# Supplementary material
Source: MDPI journal article supplement (https://www.mdpi.com/2073-445X/13/2/145)
Supplement: s1 [file s1]

| xerophilic species of open land (x); df: 5, 74                       |                |       |        |        |
|----------------------------------------------------------------------|----------------|-------|--------|--------|
| Model overview                                                       | R <sup>2</sup> | SE    | F      | p      |
| Statistics <sub>HAC</sub>                                            | 0.344          | 3.060 | 18.140 | <0.001 |
| Coefficients <sub>HAC</sub>                                          | B              | SE    | t      | p      |
| Shade [%]                                                            | -0.101         | 0.038 | -2.675 | 0.092  |
| Herb [%]                                                             | 0.090          | 0.111 | 0.811  | 0.420  |
| Grass [%]                                                            | -0.067         | 0.051 | -1.318 | 0.192  |
| Litter [%]                                                           | 0.010          | 0.044 | 0.222  | 0.825  |
| Open ground [%]                                                      | 0.082          | 0.071 | 1.158  | 0.251  |
| hygrophilic species of open land (h); df: 5, 74                      |                |       |        |        |
| Model overview                                                       | R <sup>2</sup> | SE    | F      | p      |
| Statistics <sub>HAC</sub>                                            | 0.401          | 2.935 | 33.792 | <0.001 |
| Coefficients <sub>HAC</sub>                                          | B              | SE    | t      | p      |
| Shade [%]                                                            | -0.063         | 0.029 | -2.195 | 0.013  |
| Herb [%]                                                             | -0.184         | 0.109 | -1.691 | 0.095  |
| Grass [%]                                                            | 0.012          | 0.038 | 0.313  | 0.756  |
| Litter [%]                                                           | -0.119         | 0.033 | -3.580 | 0.001  |
| Open ground [%]                                                      | -0.132         | 0.025 | -5.231 | <0.001 |
| eurytopic species of open land (eu); df: 5, 74                       |                |       |        |        |
| Model overview                                                       | R <sup>2</sup> | SE    | F      | p      |
| Statistics <sub>HAC</sub>                                            | 0.323          | 3.000 | 12.236 | <0.001 |
| Coefficients <sub>HAC</sub>                                          | B              | SE    | t      | p      |
| Shade [%]                                                            | -0.079         | 0.017 | -4.529 | <0.001 |
| Herb [%]                                                             | 0.091          | 0.064 | 1.416  | 0.161  |
| Grass [%]                                                            | 0.071          | 0.051 | 1.397  | 0.167  |
| Litter [%]                                                           | 0.060          | 0.041 | 1.462  | 0.148  |
| Open ground [%]                                                      | 0.124          | 0.030 | 4.101  | <0.001 |
| slightly hygrophilic forest species ((h)f) <sup>1)</sup> ; df: 5, 72 |                |       |        |        |
| Model overview                                                       | R <sup>2</sup> | SE    | F      | p      |
| Statistics <sub>HAC</sub>                                            | 0.413          | 3.596 | 18.662 | <0.001 |
| Coefficients <sub>HAC</sub>                                          | B              | SE    | t      | p      |
| Shade [%]                                                            | 0.146          | 0.017 | 8.755  | <0.001 |
| Herb [%]                                                             | 0.002          | 0.082 | 0.025  | 0.981  |
| Grass [%]                                                            | -0.101         | 0.042 | -4.424 | 0.018  |
| Litter [%]                                                           | -0.055         | 0.025 | -2.179 | 0.033  |
| Open ground [%]                                                      | -0.142         | 0.032 | -4.385 | <0.001 |
| eurytopic forest species (f); df: 5, 74                              |                |       |        |        |
| Model overview                                                       | R <sup>2</sup> | SE    | F      | p      |
| Statistics <sub>HAC</sub>                                            | 0.487          | 4.042 | 73.986 | <0.001 |
| Coefficients <sub>HAC</sub>                                          | B              | SE    | t      | p      |
| Shade [%]                                                            | 0.094          | 0.030 | 3.105  | 0.003  |
| Herb [%]                                                             | 0.069          | 0.100 | 0.692  | 0.491  |
| Grass [%]                                                            | 0.167          | 0.063 | 2.626  | 0.011  |
| Litter [%]                                                           | 0.140          | 0.050 | 2.789  | 0.007  |
| Open ground [%]                                                      | 0.093          | 0.050 | 1.878  | 0.064  |

After elimination of the outliers in SRC3 trap1 2014 and SRC3 Trap2 2014. Outlier test +/- 3 SD
