# Supplementary material
Source: MDPI journal article supplement (https://www.mdpi.com/2073-445X/13/2/145)
Supplement: s1 [file s1]

| 1st year of growth                 |             |        |        |                               |                      |
|------------------------------------|-------------|--------|--------|-------------------------------|----------------------|
| Statistics                         | Axis 1      | Axis 2 | Axis 3 | Axis 4                        |                      |
| Eigenvalues                        | 0.40        | 0.17   | 0.05   | 0.02                          |                      |
| Variance explanation (cumulative)  | 39.89       | 57.01  | 62.45  | 64.88                         |                      |
| Pseudo-canonical correlation       | 0.98        | 0.96   | 0.87   | 0.63                          |                      |
| Structure variables                | VarExpl [%] | F      | p      | p <sub>adj</sub> <sup>*</sup> | Sign <sub>adj.</sub> |
| Shade                              | 36.0        | 11.3   | <0.001 | 0.001                         | ***                  |
| Litter                             | 9.7         | 3.4    | 0.002  | 0.004                         | **                   |
| Grass                              | 9.7         | 3.4    | 0.002  | 0.004                         | **                   |
| Herb                               | 4.5         | 2.1    | 0.016  | 0.016                         | *                    |
| Open ground                        | 3.1         | 1.5    | 0.128  | 0.128                         | n.s.                 |
| Variance explanation Total [%]     | 66.3        |        |        |                               |                      |
| Total variance in the species data | 11.81       |        |        |                               |                      |
| 2nd year of growth                 |             |        |        |                               |                      |
| Statistics                         | Axis 1      | Axis 2 | Axis 3 | Axis 4                        |                      |
| Eigenvalues                        | 0.40        | 0.15   | 0.06   | 0.03                          |                      |
| Variance explanation (cumulative)  | 39.59       | 54.88  | 61.05  | 63.55                         |                      |
| Pseudo-canonical correlation       | 0.99        | 0.97   | 0.81   | 0.70                          |                      |
| Structure variables                | VarExpl [%] | F      | p      | p <sub>adj</sub> <sup>*</sup> | Sign <sub>adj.</sub> |
| Shade                              | 30.0        | 8.6    | <0.001 | 0.001                         | ***                  |
| Litter                             | 13.2        | 4.4    | <0.001 | 0.001                         | ***                  |
| Grass                              | 13.2        | 5.5    | <0.001 | 0.001                         | ***                  |
| Herb                               | 5.3         | 2.3    | 0.014  | 0.014                         | *                    |
| Open ground                        | 3.7         | 1.7    | 0.071  | 0.071                         | n.s.                 |
| Variance explanation Total [%]     | 65.4        |        |        |                               |                      |
| Total variance in the species data | 11.84       |        |        |                               |                      |
| 3rd year of growth                 |             |        |        |                               |                      |
| Statistics                         | Axis 1      | Axis 2 | Axis 3 | Axis 4                        |                      |
| Eigenvalues                        | 0.32        | 0.15   | 0.05   | 0.03                          |                      |
| Variance explanation (cumulative)  | 32.18       | 47.61  | 52.69  | 55.55                         |                      |
| Pseudo-canonical correlation       | 0.94        | 0.94   | 0.73   | 0.69                          |                      |
| Structure variables                | VarExpl [%] | F      | P      | P <sub>adj</sub> <sup>*</sup> | Sign <sub>adj.</sub> |
| Shade                              | 27.2        | 10.4   | <0.001 | 0.001                         | ***                  |
| Litter                             | 11.1        | 4.8    | <0.001 | 0.001                         | ***                  |
| Grass                              | 12.0        | 6.3    | <0.001 | 0.001                         | ***                  |
| Herb                               | 4.0         | 2.2    | 0.013  | 0.025                         | *                    |
| Open ground                        | 3.0         | 1.7    | 0.074  | 0.074                         | n.s.                 |
| Variance explanation Total [%]     | 57.3        |        |        |                               |                      |
| Total variance in the species data | 16.61       |        |        |                               |                      |
| 4th year of growth                 |             |        |        |                               |                      |
| Statistics                         | Axis 1      | Axis 2 | Axis 3 | Axis 4                        |                      |
| Eigenvalues                        | 0.39        | 0.20   | 0.07   | 0.05                          |                      |
| Variance explanation (cumulative)  | 39.25       | 59.04  | 66.26  | 70.81                         |                      |
| Pseudo-canonical correlation       | 0.98        | 0.95   | 0.92   | 0.81                          |                      |
| Structure variables                | VarExpl [%] | F      | p      | p <sub>adj</sub> <sup>*</sup> | Sign <sub>adj.</sub> |
| Shade                              | 34.8        | 6.4    | <0.001 | 0.001                         | ***                  |
| Litter                             | 16.0        | 3.6    | 0.003  | 0.010                         | **                   |
| Grass                              | 13.3        | 3.7    | 0.003  | 0.011                         | *                    |
| Herb                               | 6.6         | 2.0    | 0.071  | 0.141                         | n.s.                 |

|                                    |      |     |       |       |      |
|------------------------------------|------|-----|-------|-------|------|
| Open ground                        | 1.2  | 0.3 | 0.934 | 0.934 | n.s. |
| Variance explanation Total [%]     | 71.8 |     |       |       |      |
| Total variance in the species data | 7.61 |     |       |       |      |
