# Supplementary material
Source: MDPI journal article supplement (https://www.mdpi.com/2073-445X/13/2/145)
Supplement: s1 [file s1]

| Arable field species (FIE) <sup>1</sup> ; df: 5, 73                  |                |        |        |        |
|----------------------------------------------------------------------|----------------|--------|--------|--------|
| Model overview                                                       | R <sup>2</sup> | SE     | F      | p      |
| Statistics <sub>HAC</sub>                                            | 0.388          | 6.456  | 7.289  | <0.001 |
| Coefficients <sub>HAC</sub>                                          | B              | SE     | t      | p      |
| Shade [%]                                                            | -0.099         | 0.033  | -3.037 | 0.003  |
| Herb [%]                                                             | -0.084         | 0.131  | -0.638 | 0.525  |
| Grass [%]                                                            | 0.075          | 0.045  | 1.682  | 0.097  |
| Litter [%]                                                           | -0.097         | 0.045  | -2.183 | 0.032  |
| Open ground [%]                                                      | 0.039          | 0.044  | 0.876  | 0.384  |
| Grassland species (GRL); df: 5, 74                                   |                |        |        |        |
| Model overview                                                       | R <sup>2</sup> | SE     | F      | p      |
| Statistics <sub>HAC</sub>                                            | 0.422          | 5.297  | 16.819 | <0.001 |
| Coefficients <sub>HAC</sub>                                          | B              | SE     | t      | p      |
| Shade [%]                                                            | -0.094         | 0.024  | -3.960 | <0.001 |
| Herb [%]                                                             | 0.077          | 0.121  | 0.636  | 0.527  |
| Grass [%]                                                            | -0.034         | 0.074  | -0.466 | 0.643  |
| Litter [%]                                                           | 0.068          | 0.056  | 1.217  | 0.228  |
| Open ground [%]                                                      | 0.134          | 0.055  | 2.423  | 0.018  |
| Ruderal species (RUD) <sup>2</sup> ; df: 5, 73                       |                |        |        |        |
| Model overview                                                       | R <sup>2</sup> | SE     | F      | p      |
| Statistics <sub>HAC</sub>                                            | 0.375          | 3.167  | 35.332 | <0.001 |
| Coefficients <sub>HAC</sub>                                          | B              | SE     | t      | p      |
| Shade [%]                                                            | 0.091          | 0.015  | 6.170  | <0.001 |
| Herb [%]                                                             | 0.076          | 0.042  | 1.808  | 0.075  |
| Grass [%]                                                            | -0.010         | 0.019  | -0.530 | 0.598  |
| Litter [%]                                                           | -0.012         | 0.027  | -0.431 | 0.668  |
| Open ground [%]                                                      | -0.051         | 0.028  | -1.815 | 0.074  |
| Forest species, in general (FOR); df: 5, 74                          |                |        |        |        |
| Model overview                                                       | R <sup>2</sup> | SE     | F      | p      |
| Statistics <sub>HAC</sub>                                            | 0.506          | 19.358 | 1.967  | 0.094  |
| Coefficients <sub>HAC</sub>                                          | B              | SE     | t      | p      |
| Shade [%]                                                            | 0.061          | 0.099  | 0.611  | 0.543  |
| Herb [%]                                                             | 0.783          | 0.284  | 2.754  | 0.007  |
| Grass [%]                                                            | 0.732          | 0.288  | 2.544  | 0.013  |
| Litter [%]                                                           | 0.724          | 0.251  | 2.886  | 0.005  |
| Open ground [%]                                                      | 0.835          | 0.309  | 2.705  | 0.009  |
| Group of species with different habitat preferences (MIX); df: 5, 74 |                |        |        |        |
| Model overview                                                       | R <sup>2</sup> | SE     | F      | p      |
| Statistics <sub>HAC</sub>                                            | 0.213          | 5.224  | 7.652  | 0.008  |
| Coefficients <sub>HAC</sub>                                          | B              | SE     | t      | p      |
| Shade [%]                                                            | -0.037         | 0.039  | -0.950 | 0.345  |
| Herb [%]                                                             | -0.150         | 0.107  | -1.404 | 0.165  |
| Grass [%]                                                            | -0.120         | 0.161  | -0.743 | 0.460  |
| Litter [%]                                                           | -0.086         | 0.083  | -1.034 | 0.305  |
| Open ground [%]                                                      | 0.063          | 0.060  | 1.060  | 0.293  |

1) After elimination of the outlier in SRC3 trap4 2011, outlier test +/- 3 SD

2) After elimination of the outlier in SRC1 trap3 2013. outlier test +/- 3 SD
