# Supplementary material
Source: MDPI journal article supplement (https://www.mdpi.com/2073-445X/13/2/145)
Supplement: s1 [file s1]

| 2011                | F    | FIE                  | FAL                 | GRO                | SRC1 (1)             | SRC2 (2)             | SRC3 (3)            | SRC4 (3)           | HEA                  | FOR                | MEA                |
|---------------------|------|----------------------|---------------------|--------------------|----------------------|----------------------|---------------------|--------------------|----------------------|--------------------|--------------------|
| Log series $\alpha$ | 20.6 | 4.3 <sup>c,d</sup>   | 5.3 <sup>b,c</sup>  | 4.1 <sup>d</sup>   | 5.9 <sup>a,b</sup>   | 5.8 <sup>a,b</sup>   | 6.7 <sup>a</sup>    | 6.0 <sup>a,b</sup> | 6.5 <sup>a</sup>     | 2.2 <sup>e</sup>   | 2.8 <sup>e</sup>   |
| Shan-Expo           | 24.3 | 8.1 <sup>b,c</sup>   | 7.2 <sup>c</sup>    | 5.6 <sup>d</sup>   | 9.0 <sup>a,b</sup>   | 8.2 <sup>b,c</sup>   | 10.1 <sup>a</sup>   | 7.9 <sup>b,c</sup> | 9.4 <sup>a</sup>     | 5.2 <sup>d,e</sup> | 4.3 <sup>e</sup>   |
| Shannon             | 27.0 | 2.1 <sup>b,c,d</sup> | 2.0 <sup>d</sup>    | 1.7 <sup>e</sup>   | 2.2 <sup>a,b,c</sup> | 2.1 <sup>b,c,d</sup> | 2.3 <sup>a</sup>    | 2.1 <sup>c,d</sup> | 2.2 <sup>a,b</sup>   | 1.6 <sup>e</sup>   | 1.4 <sup>f</sup>   |
| Evenness            | 5.9  | 0.7 <sup>b</sup>     | 0.7 <sup>b,c</sup>  | 0.6 <sup>b,c</sup> | 0.7 <sup>b,c</sup>   | 0.6 <sup>b,c</sup>   | 0.7 <sup>b</sup>    | 0.6 <sup>b,c</sup> | 0.7 <sup>b</sup>     | 0.8 <sup>a</sup>   | 0.6 <sup>c</sup>   |
| Simpson             | 15.9 | 6.1 <sup>a,b</sup>   | 4.6 <sup>c</sup>    | 3.4 <sup>d,e</sup> | 6.1 <sup>a,b</sup>   | 5.2 <sup>b,c</sup>   | 6.8 <sup>a</sup>    | 5.2 <sup>b,c</sup> | 6.7 <sup>a</sup>     | 4.4 <sup>c,d</sup> | 2.8 <sup>e</sup>   |
| 2012                | F    | FIE                  | FAL                 | GRO                | SRC1 (1)             | SRC2 (2)             | SRC3 (3)            | SRC4 (3)           | HEA                  | FOR                | MEA                |
| Log series $\alpha$ | 14.3 | 4.8 <sup>c</sup>     | 7.6 <sup>a,b</sup>  | 3.7 <sup>c</sup>   | 8.4 <sup>a,b</sup>   | 9.1 <sup>a</sup>     | 8.1 <sup>a,b</sup>  | 7.2 <sup>b</sup>   | 7.8 <sup>a,b</sup>   | 4.1 <sup>c</sup>   | 4.0 <sup>c</sup>   |
| Shan-Expo           | 30.8 | 6.0 <sup>c</sup>     | 10.4 <sup>b</sup>   | 5.9 <sup>c,d</sup> | 14.7 <sup>a</sup>    | 15.6 <sup>a</sup>    | 14.0 <sup>a</sup>   | 11.2 <sup>b</sup>  | 12.0 <sup>b</sup>    | 6.9 <sup>c</sup>   | 4.7 <sup>d</sup>   |
| Shannon             | 24.8 | 1.9 <sup>d</sup>     | 2.3 <sup>c</sup>    | 1.8 <sup>d</sup>   | 2.7 <sup>a</sup>     | 2.7 <sup>a</sup>     | 2.6 <sup>a,b</sup>  | 2.4 <sup>b,c</sup> | 2.5 <sup>a,b,c</sup> | 1.9 <sup>d</sup>   | 1.5 <sup>e</sup>   |
| Evenness            | 10.4 | 0.6 <sup>c,d</sup>   | 0.8 <sup>a</sup>    | 0.7 <sup>b,c</sup> | 0.8 <sup>a</sup>     | 0.9 <sup>a</sup>     | 0.8 <sup>a</sup>    | 0.8 <sup>a,b</sup> | 0.8 <sup>a,b</sup>   | 0.8 <sup>a</sup>   | 0.6 <sup>d</sup>   |
| Simpson             | 23.2 | 4.3 <sup>d,e</sup>   | 7.7 <sup>c</sup>    | 4.1 <sup>d,e</sup> | 10.6 <sup>a,b</sup>  | 12.0 <sup>a</sup>    | 10.0 <sup>b</sup>   | 7.8 <sup>c</sup>   | 7.8 <sup>c</sup>     | 5.6 <sup>d</sup>   | 2.7 <sup>e</sup>   |
| 2013                | F    | FIE                  | FAL                 | GRO                | SRC1 (1)             | SRC2 (2)             | SRC3 (3)            | SRC4 (3)           | HEA                  | FOR                | MEA                |
| Log series $\alpha$ | 12.0 | 5.7 <sup>c</sup>     | 10.4 <sup>a</sup>   | 3.5 <sup>d</sup>   | 7.6 <sup>b,c</sup>   | 6.5 <sup>b,c</sup>   | 8.5 <sup>a,b</sup>  | 5.8 <sup>c</sup>   | 7.2 <sup>b,c</sup>   | 2.5 <sup>d</sup>   | 3.3 <sup>d</sup>   |
| Shan-Expo           | 13.2 | 10.8 <sup>a,b</sup>  | 10.3 <sup>a,b</sup> | 6.1 <sup>c</sup>   | 11.3 <sup>a,b</sup>  | 10.3 <sup>a,b</sup>  | 11.5 <sup>a</sup>   | 9.2 <sup>b</sup>   | 11.3 <sup>a,b</sup>  | 6.4 <sup>c</sup>   | 4.5 <sup>c</sup>   |
| Shannon             | 18.5 | 2.4 <sup>a</sup>     | 2.3 <sup>a</sup>    | 1.8 <sup>b</sup>   | 2.4 <sup>a</sup>     | 2.3 <sup>a</sup>     | 2.4 <sup>a</sup>    | 2.2 <sup>a</sup>   | 2.4 <sup>a</sup>     | 1.9 <sup>b</sup>   | 1.5 <sup>c</sup>   |
| Evenness            | 18.8 | 0.8 <sup>c,d</sup>   | 0.9 <sup>a</sup>    | 0.7 <sup>e</sup>   | 0.7 <sup>d</sup>     | 0.7 <sup>d</sup>     | 0.8 <sup>b</sup>    | 0.8 <sup>b</sup>   | 0.8 <sup>c,d</sup>   | 0.8 <sup>b,c</sup> | 0.6 <sup>f</sup>   |
| Simpson             | 7.8  | 8.3 <sup>a</sup>     | 8.1 <sup>a</sup>    | 4.4 <sup>c,d</sup> | 6.9 <sup>a,b</sup>   | 7.0 <sup>a,b</sup>   | 8.1 <sup>a</sup>    | 6.7 <sup>a,b</sup> | 6.9 <sup>a,b</sup>   | 5.4 <sup>b,c</sup> | 3.2 <sup>d</sup>   |
| 2014                | F    | FIE                  | FAL                 | GRO                | SRC1 (1)             | SRC2 (2)             | SRC3 (3)            | SRC4 (3)           | HEA                  | FOR                | MEA                |
| Log series $\alpha$ | 17.5 | 5.4 <sup>b</sup>     | 6.7 <sup>a</sup>    | 3.8 <sup>c,d</sup> | 7.2 <sup>a</sup>     | 7.6 <sup>a</sup>     | 4.5 <sup>b,c</sup>  | 7.6 <sup>a</sup>   | 8.1 <sup>a</sup>     | 2.9 <sup>d</sup>   | 3.7 <sup>c,d</sup> |
| Shan-Expo           | 28.6 | 8.9 <sup>c</sup>     | 6.8 <sup>d</sup>    | 5.7 <sup>d,e</sup> | 11.7 <sup>b</sup>    | 12.6 <sup>a,b</sup>  | 5.5 <sup>d,e</sup>  | 9.4 <sup>c</sup>   | 14.2 <sup>a</sup>    | 7.0 <sup>d</sup>   | 4.4 <sup>e</sup>   |
| Shannon             | 26.6 | 2.2 <sup>b</sup>     | 1.9 <sup>c</sup>    | 1.7 <sup>c,d</sup> | 2.5 <sup>a</sup>     | 2.5 <sup>a</sup>     | 1.7 <sup>d,e</sup>  | 2.2 <sup>b</sup>   | 2.6 <sup>a</sup>     | 1.9 <sup>c</sup>   | 1.5 <sup>e</sup>   |
| Evenness            | 14.8 | 0.7 <sup>b</sup>     | 0.6 <sup>b</sup>    | 0.6 <sup>b</sup>   | 0.8 <sup>a</sup>     | 0.8 <sup>a</sup>     | 0.6 <sup>b,c</sup>  | 0.8 <sup>a</sup>   | 0.8 <sup>a</sup>     | 0.8 <sup>a</sup>   | 0.5 <sup>c</sup>   |
| Simpson             | 16.3 | 6.4 <sup>b,c</sup>   | 3.6 <sup>e</sup>    | 3.9 <sup>d,e</sup> | 7.8 <sup>b</sup>     | 8.0 <sup>b</sup>     | 3.4 <sup>e</sup>    | 6.0 <sup>c</sup>   | 10.0 <sup>a</sup>    | 5.5 <sup>c,d</sup> | 2.9 <sup>e</sup>   |
| 2011 - 2014         | F    | FIE                  | FAL                 | GRO                | SRC1 (1)             | SRC2 (2)             | SRC3 (3)            | SRC4 (3)           | HEA                  | FOR                | MEA                |
| Log series $\alpha$ | 38.1 | 6.9 <sup>c</sup>     | 8.8 <sup>a,b</sup>  | 5.0 <sup>d</sup>   | 8.0 <sup>b</sup>     | 8.0 <sup>b</sup>     | 8.8 <sup>a,b</sup>  | 8.0 <sup>b</sup>   | 9.8 <sup>a</sup>     | 3.1 <sup>e</sup>   | 4.8 <sup>d</sup>   |
| Shan-Expo           | 27.9 | 8.7 <sup>c</sup>     | 8.7 <sup>c</sup>    | 5.9 <sup>d</sup>   | 11.7 <sup>a</sup>    | 11.7 <sup>a</sup>    | 10.3 <sup>a,b</sup> | 9.4 <sup>b,c</sup> | 11.7 <sup>a</sup>    | 6.3 <sup>d</sup>   | 4.5 <sup>e</sup>   |
| Shannon             | 94.9 | 2.4 <sup>b</sup>     | 2.4 <sup>b</sup>    | 2.0 <sup>c,d</sup> | 2.7 <sup>a</sup>     | 2.7 <sup>a</sup>     | 2.7 <sup>a</sup>    | 2.5 <sup>a,b</sup> | 2.7 <sup>a</sup>     | 2.0 <sup>c</sup>   | 1.7 <sup>d</sup>   |
| Evenness            | 32.1 | 0.7 <sup>b</sup>     | 0.7 <sup>b</sup>    | 0.6 <sup>c</sup>   | 0.7 <sup>a</sup>     | 0.7 <sup>a</sup>     | 0.7 <sup>a</sup>    | 0.7 <sup>a</sup>   | 0.7 <sup>a</sup>     | 0.7 <sup>a</sup>   | 0.6 <sup>d</sup>   |
| Simpson             | 69.8 | 8.0 <sup>b</sup>     | 6.2 <sup>c</sup>    | 4.5 <sup>d</sup>   | 10.3 <sup>a</sup>    | 8.9 <sup>b</sup>     | 11.0 <sup>a</sup>   | 8.5 <sup>b</sup>   | 10.5 <sup>a</sup>    | 5.9 <sup>c</sup>   | 3.5 <sup>e</sup>   |
