# Supplementary material
Source: MDPI journal article supplement (https://www.mdpi.com/2073-445X/13/2/145)
Supplement: s1 [file s1]

| SRC1        |        |                      |                      |                      |                    | SRC2   |                    |                    |                    |                    |
|-------------|--------|----------------------|----------------------|----------------------|--------------------|--------|--------------------|--------------------|--------------------|--------------------|
|             | F      | 2011                 | 2012                 | 2013                 | 2014               | F      | 2011               | 2012               | 2013               | 2014               |
| Yog         |        | 1                    | 2                    | 3                    | 4                  |        | 2                  | 3                  | 4                  | 1                  |
| Rot         |        | 2                    | 2                    | 2                    | 2                  |        | 1                  | 1                  | 1                  | 2                  |
| Shade       | 675.49 | 7.03 <sup>d</sup>    | 46.16 <sup>c</sup>   | 52.19 <sup>b</sup>   | 69.64 <sup>a</sup> | 206.12 | 42.59 <sup>c</sup> | 58.99 <sup>b</sup> | 65.32 <sup>a</sup> | 37.90 <sup>d</sup> |
| SE          |        | 1.23                 | 1.35                 | 0.59                 | 0.69               |        | 0.74               | 0.29               | 0.23               | 1.62               |
| Herb        | 2.33   | 20.18 <sup>a</sup>   | 20.54 <sup>a,b</sup> | 16.71 <sup>a,b</sup> | 13.34 <sup>b</sup> | 8.22   | 19.48 <sup>a</sup> | 11.50 <sup>b</sup> | 16.36 <sup>a</sup> | 20.57 <sup>a</sup> |
| SE          |        | 1.95                 | 2.66                 | 2.15                 | 2.02               |        | 1.57               | 0.99               | 1.55               | 1.48               |
| Grass       | 1.63   | 5.77 <sup>a</sup>    | 9.47 <sup>a</sup>    | 8.35 <sup>a</sup>    | 6.22 <sup>a</sup>  | 0.75   | 4.62 <sup>a</sup>  | 4.32 <sup>a</sup>  | 5.77 <sup>a</sup>  | 7.40 <sup>a</sup>  |
| SE          |        | 0.55                 | 1.40                 | 1.50                 | 1.74               |        | 2.41               | 1.09               | 1.15               | 1.42               |
| Litter      | 8.74   | 26.49 <sup>b</sup>   | 26.43 <sup>b</sup>   | 40.26 <sup>a</sup>   | 39.70 <sup>a</sup> | 43.56  | 24.62 <sup>c</sup> | 29.74 <sup>b</sup> | 36.03 <sup>a</sup> | 17.25 <sup>d</sup> |
| SE          |        | 2.52                 | 0.97                 | 2.37                 | 3.88               |        | 1.42               | 1.33               | 0.93               | 1.06               |
| open ground | 20.46  | 20.92 <sup>a</sup>   | 7.01 <sup>c</sup>    | 8.51 <sup>b,c</sup>  | 11.78 <sup>b</sup> | 14.10  | 20.92 <sup>a</sup> | 23.89 <sup>a</sup> | 22.72 <sup>a</sup> | 12.45 <sup>b</sup> |
| SE          |        | 0.97                 | 0.81                 | 0.87                 | 2.29               |        | 1.43               | 1.65               | 1.49               | 0.78               |
| SRC3        |        |                      |                      |                      |                    | SRC4   |                    |                    |                    |                    |
|             | F      | 2011                 | 2012                 | 2013                 | 2014               | F      | 2011               | 2012               | 2013               | 2014               |
| Yog         |        | 3                    | 1                    | 2                    | 3                  |        | 3                  | 1                  | 2                  | 3                  |
| Rot         |        | 1                    | 2                    | 2                    | 2                  |        | 1                  | 2                  | 2                  | 2                  |
| Shade       | 203.51 | 59.35 <sup>b</sup>   | 38.21 <sup>c</sup>   | 56.40 <sup>b</sup>   | 76.25 <sup>a</sup> | 258.39 | 59.71 <sup>b</sup> | 29.00 <sup>d</sup> | 54.30 <sup>c</sup> | 78.44 <sup>a</sup> |
| SE          |        | 0.71                 | 1.05                 | 0.40                 | 1.73               |        | 2.04               | 1.11               | 0.77               | 0.66               |
| Herb        | 1.29   | 20.34 <sup>a</sup>   | 16.83 <sup>a</sup>   | 13.98 <sup>a</sup>   | 16.66 <sup>a</sup> | 40.05  | 2.15 <sup>d</sup>  | 12.14 <sup>a</sup> | 9.43 <sup>b</sup>  | 6.43 <sup>c</sup>  |
| SE          |        | 3.26                 | 1.06                 | 1.45                 | 2.68               |        | 0.48               | 0.80               | 0.74               | 0.65               |
| Grass       | 2.41   | 17.10 <sup>a,b</sup> | 17.68 <sup>a,b</sup> | 21.15 <sup>a</sup>   | 13.81 <sup>b</sup> | 17.04  | 2.60 <sup>c</sup>  | 17.57 <sup>b</sup> | 26.43 <sup>a</sup> | 8.42 <sup>c</sup>  |
| SE          |        | 2.90                 | 1.71                 | 1.11                 | 1.56               |        | 1.23               | 3.63               | 2.29               | 2.40               |
| Litter      | 24.25  | 22.98 <sup>b</sup>   | 13.21 <sup>c</sup>   | 33.43 <sup>a</sup>   | 30.35 <sup>a</sup> | 179.37 | 76.22 <sup>a</sup> | 17.29 <sup>d</sup> | 33.58 <sup>c</sup> | 58.55 <sup>b</sup> |
| SE          |        | 1.37                 | 0.84                 | 1.66                 | 2.83               |        | 2.29               | 0.88               | 1.37               | 2.71               |
| open ground | 81.95  | 32.90 <sup>a</sup>   | 19.41 <sup>b</sup>   | 5.86 <sup>d</sup>    | 10.41 <sup>c</sup> | 34.42  | 14.41 <sup>b</sup> | 21.18 <sup>a</sup> | 4.25 <sup>c</sup>  | 5.49 <sup>c</sup>  |
| SE          |        | 0.65                 | 1.12                 | 0.78                 | 2.15               |        | 1.37               | 1.93               | 1.22               | 0.53               |
