# Supplementary material
Source: MDPI journal article supplement (https://www.mdpi.com/2073-445X/13/2/145)
Supplement: s1 [file s1]

| 1st year of growth |        |        |        |        |        |        |        |        |        |
|--------------------|--------|--------|--------|--------|--------|--------|--------|--------|--------|
| StrVar             | AxeE1  | AxeE2  | AxeE3  | AxeE4  | AxeR1  | AxeR2  | AxeR3  | AxeR4  | VIF    |
| Shade              | 0.938  | -0.117 | 0.028  | 0.296  | 0.916  | -0.113 | 0.019  | 0.213  | 9.155  |
| Litter             | 0.989  | 0.045  | -0.064 | -0.122 | 0.966  | 0.044  | -0.043 | -0.088 | 17.737 |
| Grass              | -0.452 | 0.862  | -0.050 | -0.059 | -0.441 | 0.837  | -0.034 | -0.042 | 12.442 |
| Herb               | -0.418 | 0.229  | 0.694  | -0.164 | -0.408 | 0.222  | 0.466  | -0.118 | 8.071  |
| open ground        | -0.509 | -0.721 | -0.380 | 0.177  | -0.497 | -0.700 | -0.256 | 0.127  | 24.728 |
| 2nd year of growth |        |        |        |        |        |        |        |        |        |
| Shade              | 0.884  | -0.208 | -0.189 | -0.112 | 0.859  | -0.195 | -0.156 | -0.083 | 10.150 |
| Litter             | 0.999  | 0.003  | -0.011 | 0.030  | 0.970  | 0.003  | -0.009 | 0.022  | 13.437 |
| Grass              | -0.429 | 0.856  | -0.240 | -0.038 | -0.416 | 0.801  | -0.199 | -0.028 | 11.562 |
| Herb               | -0.411 | 0.060  | -0.452 | -0.190 | -0.399 | 0.056  | -0.373 | -0.141 | 6.842  |
| open ground        | -0.486 | -0.542 | 0.603  | -0.046 | -0.472 | -0.507 | 0.497  | -0.035 | 19.167 |
| 3rd year of growth |        |        |        |        |        |        |        |        |        |
| Shade              | 0.929  | -0.123 | 0.085  | -0.063 | 0.888  | -0.118 | 0.053  | -0.047 | 4.891  |
| Litter             | 0.972  | 0.072  | -0.202 | 0.063  | 0.930  | 0.069  | -0.125 | 0.048  | 13.394 |
| Grass              | -0.518 | 0.815  | 0.183  | 0.074  | -0.495 | 0.778  | 0.114  | 0.056  | 5.957  |
| Herb               | -0.399 | 0.129  | 0.674  | 0.161  | -0.381 | 0.123  | 0.419  | 0.122  | 4.127  |
| open ground        | -0.471 | -0.648 | -0.258 | 0.113  | -0.450 | -0.619 | -0.160 | 0.085  | 10.540 |
| 4th year of growth |        |        |        |        |        |        |        |        |        |
| Shade              | 0.942  | -0.075 | 0.020  | 0.322  | 0.922  | -0.070 | 0.016  | 0.306  | 7.052  |
| Litter             | 0.960  | 0.201  | -0.121 | -0.120 | 0.939  | 0.189  | -0.096 | -0.114 | 14.733 |
| Grass              | -0.625 | 0.648  | 0.335  | -0.267 | -0.612 | 0.612  | 0.267  | -0.253 | 8.532  |
| Herb               | -0.380 | 0.094  | 0.803  | -0.439 | -0.372 | 0.089  | 0.641  | -0.417 | 4.506  |
| open ground        | -0.408 | -0.635 | -0.475 | 0.444  | -0.399 | -0.599 | -0.379 | 0.421  | 13.468 |
