# Supplementary material
Source: MDPI journal article supplement (https://www.mdpi.com/2073-445X/13/2/145)
Supplement: s1 [file s1]

| 2011        | F     | FIE                | FAL                | GRO                | SRC1 (1)         | SRC2 (2)           | SRC3 (3)           | SRC4 (3)           | HEA                | FOR                | MEA                  |
|-------------|-------|--------------------|--------------------|--------------------|------------------|--------------------|--------------------|--------------------|--------------------|--------------------|----------------------|
| Alpha       | 71.8  | 1.3 <sup>c</sup>   | 1.2 <sup>c,d</sup> | 1.4 <sup>b</sup>   | 1.8 <sup>a</sup> | 1.7 <sup>a</sup>   | 1.6 <sup>a</sup>   | 1.7 <sup>a</sup>   | 1.0 <sup>e</sup>   | 0.9 <sup>e</sup>   | 1.1 <sup>d</sup>     |
| Shan-Expo   | 140.0 | 3.7 <sup>c,d</sup> | 3.7 <sup>c,d</sup> | 3.6 <sup>d</sup>   | 6.0 <sup>b</sup> | 6.6 <sup>a</sup>   | 6.2 <sup>b</sup>   | 4.0 <sup>c</sup>   | 3.6 <sup>d</sup>   | 2.5 <sup>e</sup>   | 3.5 <sup>d</sup>     |
| Shannon     | 92.7  | 1.3 <sup>b,c</sup> | 1.3 <sup>b,c</sup> | 1.3 <sup>c</sup>   | 1.8 <sup>a</sup> | 1.9 <sup>a</sup>   | 1.8 <sup>a</sup>   | 1.4 <sup>b</sup>   | 1.3 <sup>c</sup>   | 0.9 <sup>d</sup>   | 1.3 <sup>c</sup>     |
| Evenness    | 32.6  | 0.7 <sup>c,d</sup> | 0.7 <sup>b,c</sup> | 0.7 <sup>e</sup>   | 0.9 <sup>a</sup> | 0.9 <sup>a</sup>   | 0.9 <sup>a</sup>   | 0.7 <sup>d,e</sup> | 0.8 <sup>b</sup>   | 0.6 <sup>f</sup>   | 0.7 <sup>c,d</sup>   |
| Simpson     | 161.3 | 3.3 <sup>c</sup>   | 3.2 <sup>c,d</sup> | 2.9 <sup>d</sup>   | 5.1 <sup>b</sup> | 5.8 <sup>a</sup>   | 5.4 <sup>b</sup>   | 3.1 <sup>c,d</sup> | 3.1 <sup>c,d</sup> | 2.3 <sup>e</sup>   | 3.0 <sup>d</sup>     |
| 2012        | F     | FIE                | FAL                | GRO                | SRC1 (1)         | SRC2 (2)           | SRC3 (3)           | SRC4 (3)           | HEA                | FOR                | MEA                  |
| Alpha       | 33.2  | 1.1 <sup>c,d</sup> | 1.2 <sup>c</sup>   | 1.4 <sup>b</sup>   | 1.6 <sup>a</sup> | 1.6 <sup>a</sup>   | 1.6 <sup>a</sup>   | 1.7 <sup>a</sup>   | 1.0 <sup>d</sup>   | 1.4 <sup>b</sup>   | 1.4 <sup>b</sup>     |
| Shan-Expo   | 274.7 | 3.4 <sup>e</sup>   | 4.0 <sup>c</sup>   | 3.6 <sup>d,e</sup> | 5.9 <sup>b</sup> | 6.1 <sup>a,b</sup> | 6.2 <sup>a</sup>   | 6.2 <sup>a</sup>   | 3.5 <sup>e</sup>   | 2.8 <sup>f</sup>   | 3.8 <sup>c,d</sup>   |
| Shannon     | 211.2 | 1.2 <sup>c</sup>   | 1.4 <sup>b</sup>   | 1.3 <sup>c</sup>   | 1.8 <sup>a</sup> | 1.8 <sup>a</sup>   | 1.8 <sup>a</sup>   | 1.8 <sup>a</sup>   | 1.3 <sup>c</sup>   | 1.0 <sup>d</sup>   | 1.0 <sup>d</sup>     |
| Evenness    | 90.1  | 0.7 <sup>c</sup>   | 0.8 <sup>b</sup>   | 0.7 <sup>d</sup>   | 0.9 <sup>a</sup> | 0.9 <sup>a</sup>   | 0.9 <sup>a</sup>   | 0.9 <sup>a</sup>   | 0.7 <sup>b,c</sup> | 0.5 <sup>e</sup>   | 0.5 <sup>e</sup>     |
| Simpson     | 279.2 | 3.2 <sup>d</sup>   | 3.5 <sup>c</sup>   | 2.9 <sup>e</sup>   | 5.1 <sup>b</sup> | 5.3 <sup>a</sup>   | 5.3 <sup>a</sup>   | 5.3 <sup>a</sup>   | 3.0 <sup>d,e</sup> | 2.3 <sup>f</sup>   | 2.3 <sup>f</sup>     |
| 2013        | F     | FIE                | FAL                | GRO                | SRC1 (1)         | SRC2 (2)           | SRC3 (3)           | SRC4 (3)           | HEA                | FOR                | MEA                  |
| Alpha       | 23.0  | 1.2 <sup>b</sup>   | 1.0 <sup>c</sup>   | 1.0 <sup>b,c</sup> | 1.6 <sup>a</sup> | 1.6 <sup>a</sup>   | 1.6 <sup>a</sup>   | 1.5 <sup>a</sup>   | 1.0 <sup>c</sup>   | 1.0 <sup>b,c</sup> | 1.0 <sup>c</sup>     |
| Shan-Expo   | 345.1 | 3.4 <sup>e,f</sup> | 3.7 <sup>d</sup>   | 3.2 <sup>f</sup>   | 6.2 <sup>a</sup> | 6.1 <sup>a,b</sup> | 5.9 <sup>b</sup>   | 5.7 <sup>c</sup>   | 3.5 <sup>e</sup>   | 2.7 <sup>g</sup>   | 3.7 <sup>d</sup>     |
| Shannon     | 184.3 | 1.2 <sup>d,e</sup> | 1.3 <sup>c</sup>   | 1.2 <sup>e</sup>   | 1.8 <sup>a</sup> | 1.8 <sup>a</sup>   | 1.8 <sup>a,b</sup> | 1.7 <sup>b</sup>   | 1.2 <sup>d</sup>   | 1.0 <sup>f</sup>   | 1.3 <sup>c</sup>     |
| Evenness    | 18.9  | 0.7 <sup>d</sup>   | 0.8 <sup>b,c</sup> | 0.7 <sup>d</sup>   | 0.9 <sup>a</sup> | 0.9 <sup>a,b</sup> | 0.9 <sup>a,b</sup> | 0.9 <sup>a,b</sup> | 0.8 <sup>c</sup>   | 0.6 <sup>e</sup>   | 0.8 <sup>a,b,c</sup> |
| Simpson     | 364.1 | 3.1 <sup>d</sup>   | 3.3 <sup>c</sup>   | 2.7 <sup>e</sup>   | 5.3 <sup>a</sup> | 5.2 <sup>a</sup>   | 5.2 <sup>a</sup>   | 5.0 <sup>b</sup>   | 3.0 <sup>d</sup>   | 2.4 <sup>f</sup>   | 3.3 <sup>c</sup>     |
| 2014        | F     | FIE                | FAL                | GRO                | SRC1 (1)         | SRC2 (2)           | SRC3 (3)           | SRC4 (3)           | HEA                | FOR                | MEA                  |
| Alpha       | 38.3  | 1.3 <sup>c,d</sup> | 1.1 <sup>d</sup>   | 1.5 <sup>b</sup>   | 1.5 <sup>b</sup> | 2.2 <sup>a</sup>   | 1.5 <sup>b</sup>   | 1.4 <sup>b,c</sup> | 0.8 <sup>e</sup>   | 1.1 <sup>d</sup>   | 0.8 <sup>e</sup>     |
| Shan-Expo   | 225.5 | 3.1 <sup>e</sup>   | 3.5 <sup>d</sup>   | 3.6 <sup>d</sup>   | 5.2 <sup>b</sup> | 7.4 <sup>a</sup>   | 5.1 <sup>b</sup>   | 4.1 <sup>c</sup>   | 3.0 <sup>e,f</sup> | 2.8 <sup>f</sup>   | 3.0 <sup>e,f</sup>   |
| Shannon     | 144.5 | 1.1 <sup>e</sup>   | 1.2 <sup>d</sup>   | 1.3 <sup>d</sup>   | 1.7 <sup>b</sup> | 2.0 <sup>a</sup>   | 1.6 <sup>b</sup>   | 1.4 <sup>c</sup>   | 1.1 <sup>e,f</sup> | 1.0 <sup>f</sup>   | 1.1 <sup>e,f</sup>   |
| Evenness    | 66.5  | 0.7 <sup>e</sup>   | 0.8 <sup>c,d</sup> | 0.7 <sup>e</sup>   | 0.8 <sup>b</sup> | 0.9 <sup>a</sup>   | 0.8 <sup>b</sup>   | 0.7 <sup>d</sup>   | 0.8 <sup>c</sup>   | 0.6 <sup>f</sup>   | 0.8 <sup>c</sup>     |
| Simpson     | 163.0 | 2.7 <sup>d</sup>   | 3.2 <sup>c</sup>   | 2.9 <sup>d</sup>   | 4.1 <sup>b</sup> | 6.3 <sup>a</sup>   | 4.0 <sup>b</sup>   | 3.3 <sup>c</sup>   | 2.8 <sup>d</sup>   | 2.4 <sup>e</sup>   | 2.7 <sup>d</sup>     |
| 2011 - 2014 | F     | FIE                | FAL                | GRO                | SRC1 (1)         | SRC2 (2)           | SRC3 (3)           | SRC4 (3)           | HEA                | FOR                | MEA                  |
| Anzahl HP   | 58.9  | 5.9 <sup>d</sup>   | 5.6 <sup>d,e</sup> | 6.7 <sup>c</sup>   | 7.8 <sup>b</sup> | 8.3 <sup>a</sup>   | 7.8 <sup>b</sup>   | 7.6 <sup>b</sup>   | 4.9 <sup>f</sup>   | 5.7 <sup>d,e</sup> | 5.4 <sup>e</sup>     |
| Alpha       | 50.9  | 1.2 <sup>c,d</sup> | 1.1 <sup>d,e</sup> | 1.3 <sup>c</sup>   | 1.6 <sup>b</sup> | 1.8 <sup>a</sup>   | 1.6 <sup>b</sup>   | 1.6 <sup>b</sup>   | 1.0 <sup>f</sup>   | 1.1 <sup>d,e</sup> | 1.1 <sup>d,e</sup>   |
| Shan-Expo   | 152.6 | 3.4 <sup>d</sup>   | 3.7 <sup>d</sup>   | 3.5 <sup>d</sup>   | 5.8 <sup>b</sup> | 6.5 <sup>a</sup>   | 5.8 <sup>b</sup>   | 5.0 <sup>c</sup>   | 3.4 <sup>d</sup>   | 2.7 <sup>e</sup>   | 3.5 <sup>d</sup>     |
| Shannon     | 153.9 | 1.2 <sup>e</sup>   | 1.3 <sup>d</sup>   | 1.2 <sup>e</sup>   | 1.8 <sup>b</sup> | 1.9 <sup>a</sup>   | 1.8 <sup>b</sup>   | 1.6 <sup>c</sup>   | 1.2 <sup>e</sup>   | 1.0 <sup>f</sup>   | 1.2 <sup>e</sup>     |
| Evenness    | 52.7  | 0.7 <sup>c,d</sup> | 0.8 <sup>b</sup>   | 0.7 <sup>d</sup>   | 0.9 <sup>a</sup> | 0.9 <sup>a</sup>   | 0.9 <sup>a</sup>   | 0.8 <sup>b</sup>   | 0.8 <sup>b</sup>   | 0.6 <sup>e</sup>   | 0.7 <sup>c</sup>     |
| Simpson     | 108.8 | 3.1 <sup>d,e</sup> | 3.3 <sup>d</sup>   | 2.9 <sup>e</sup>   | 4.9 <sup>b</sup> | 5.7 <sup>a</sup>   | 5.0 <sup>b</sup>   | 4.2 <sup>c</sup>   | 3.0 <sup>d,e</sup> | 2.3 <sup>f</sup>   | 2.8 <sup>e</sup>     |
