# Supplementary material
Source: MDPI journal article supplement (https://www.mdpi.com/2073-445X/13/2/145)
Supplement: s1 [file s1]

| 1st year of growth                 |             |        |        |                               |                      |
|------------------------------------|-------------|--------|--------|-------------------------------|----------------------|
| Statistics                         | Axis 1      | Axis 2 | Axis 3 | Axis 4                        |                      |
| Eigenvalues                        | 0.36        | 0.16   | 0.05   | 0.02                          |                      |
| Variance explanation (cumulative)  | 35.78       | 51.43  | 56.70  | 58.45                         |                      |
| Pseudo-canonical correlation       | 0.98        | 0.97   | 0.67   | 0.72                          |                      |
| Structure variables                | VarExpl [%] | F      | p      | p <sub>adj</sub> <sup>*</sup> | Sign <sub>adj.</sub> |
| Shade                              | 31.8        | 9.3    | <0.001 | 0.001                         | ***                  |
| Litter                             | 7.2         | 2.3    | 0.023  | 0.046                         | *                    |
| Grass                              | 13.5        | 5.1    | <0.001 | 0.001                         | ***                  |
| Herb                               | 4.4         | 1.7    | 0.089  | 0.089                         | n.s.                 |
| Open ground                        | 2.6         | 1.0    | 0.407  | 0.407                         | n.s.                 |
| Variance explanation Total [%]     | 59.5        |        |        |                               |                      |
| Total variance in the species data | 11.54       |        |        |                               |                      |
| 2nd year of growth                 |             |        |        |                               |                      |
| Statistics                         | Axis 1      | Axis 2 | Axis 3 | Axis 4                        |                      |
| Eigenvalues                        | 0.33        | 0.15   | 0.10   | 0.02                          |                      |
| Variance explanation (cumulative)  | 33.12       | 47.64  | 57.46  | 59.38                         |                      |
| Pseudo-canonical correlation       | 0.97        | 0.94   | 0.83   | 0.74                          |                      |
| Structure variables                | VarExpl [%] | F      | p      | p <sub>adj</sub> <sup>*</sup> | Sign <sub>adj.</sub> |
| Shade                              | 27.1        | 7.4    | <0.001 | 0.001                         | ***                  |
| Litter                             | 11.7        | 3.6    | <0.001 | 0.002                         | **                   |
| Grass                              | 12.5        | 4.6    | <0.001 | 0.001                         | ***                  |
| Herb                               | 5.7         | 2.2    | 0.037  | 0.037                         | *                    |
| Open ground                        | 3.7         | 1.5    | 0.148  | 0.148                         | n.s.                 |
| Variance explanation Total [%]     | 60.7        |        |        |                               |                      |
| Total variance in the species data | 12.00       |        |        |                               |                      |
| 3rd year of growth                 |             |        |        |                               |                      |
| Statistics                         | Axis 1      | Axis 2 | Axis 3 | Axis 4                        |                      |
| Eigenvalues                        | 0.31        | 0.14   | 0.05   | 0.02                          |                      |
| Variance explanation (cumulative)  | 30.92       | 45.26  | 50.47  | 52.90                         |                      |
| Pseudo-canonical correlation       | 0.96        | 0.95   | 0.62   | 0.76                          |                      |
| Structure variables                | VarExpl [%] | F      | p      | p <sub>adj</sub> <sup>*</sup> | Sign <sub>adj.</sub> |
| Shade                              | 27.2        | 10.4   | <0.001 | 0.001                         | ***                  |
| Litter                             | 7.8         | 3.2    | 0.001  | 0.002                         | **                   |
| Grass                              | 12.6        | 6.2    | <0.001 | 0.001                         | ***                  |
| Herb                               | 4.9         | 2.6    | 0.011  | 0.022                         | *                    |
| Open ground                        | 2.5         | 1.3    | 0.205  | 0.205                         | n.s.                 |
| Variance explanation Total [%]     | 54.9        |        |        |                               |                      |
| Total variance in the species data | 16.48       |        |        |                               |                      |
| 4th year of growth                 |             |        |        |                               |                      |
| Statistics                         | Axis 1      | Axis 2 | Axis 3 | Axis 4                        |                      |
| Eigenvalues                        | 0.38        | 0.17   | 0.08   | 0.05                          |                      |
| Variance explanation (cumulative)  | 37.79       | 54.53  | 62.21  | 67.41                         |                      |
| Pseudo-canonical correlation       | 0.98        | 0.94   | 0.80   | 0.95                          |                      |
| Structure variables                | VarExpl [%] | F      | p      | p <sub>adj</sub> <sup>*</sup> | Sign <sub>adj.</sub> |
| Shade                              | 34.2        | 6.2    | <0.001 | 0.001                         | ***                  |
| Litter                             | 11.2        | 2.3    | 0.024  | 0.048                         | *                    |
| Grass                              | 12.1        | 2.8    | 0.01   | 0.038                         | *                    |

|                                    |      |     |       |       |      |
|------------------------------------|------|-----|-------|-------|------|
| Herb                               | 9.4  | 2.6 | 0.025 | 0.073 | n.s. |
| Open ground                        | 2.0  | 0.5 | 0.847 | 0.847 | n.s. |
| Variance explanation Total [%]     | 68.9 |     |       |       |      |
| Total variance in the species data | 7.60 |     |       |       |      |
