# Supplementary material
Source: MDPI journal article supplement (https://www.mdpi.com/2073-445X/13/2/145)
Supplement: s1 [file s1]

| 2011          | F    | FIE                   | FAL                  | GRO                  | SRC1 (1)             | SRC2 (2)             | SRC3 (3)             | SRC4 (3)             | HEA                  | FOR                | MEA                  |
|---------------|------|-----------------------|----------------------|----------------------|----------------------|----------------------|----------------------|----------------------|----------------------|--------------------|----------------------|
| Species a     |      | 36                    | 34                   | 26                   | 45                   | 42                   | 47                   | 40                   | 43                   | 10                 | 21                   |
| Species m     | 47.8 | 21.4 <sup>c</sup>     | 20.8 <sup>c</sup>    | 16.2 <sup>d</sup>    | 28.0 <sup>a,b</sup>  | 29.0 <sup>a</sup>    | 27.4 <sup>a,b</sup>  | 24.8 <sup>b</sup>    | 27.4 <sup>a,b</sup>  | 7.8 <sup>f</sup>   | 11.0 <sup>e</sup>    |
| SE            |      | 0.98                  | 1.20                 | 1.11                 | 0.71                 | 1.38                 | 1.12                 | 0.58                 | 1.94                 | 0.20               | 0.55                 |
| Individuals a |      | 3136                  | 1364                 | 1046                 | 3484                 | 4243                 | 2020                 | 1945                 | 2230                 | 391                | 721                  |
| Individuals m | 48.8 | 627.2 <sup>b</sup>    | 272.8 <sup>d</sup>   | 209.2 <sup>d,e</sup> | 696.8 <sup>b</sup>   | 848.6 <sup>a</sup>   | 404.0 <sup>c</sup>   | 389.0 <sup>c</sup>   | 446.0 <sup>c</sup>   | 78.2 <sup>f</sup>  | 144.2 <sup>d,e</sup> |
| SE            |      | 64.73                 | 16.45                | 18.74                | 29.89                | 64.98                | 37.08                | 26.72                | 22.14                | 5.46               | 17.19                |
| 2012          | F    | FIE                   | FAL                  | GRO                  | SRC1 (2)             | SRC2 (3)             | SRC3 (1)             | SRC4 (1)             | HEA                  | FOR                | MEA                  |
| Species a     |      | 34                    | 33                   | 22                   | 37                   | 39                   | 42                   | 34                   | 36                   | 16                 | 21                   |
| Species m     | 24.4 | 20.6 <sup>b</sup>     | 16.6 <sup>c</sup>    | 12.4 <sup>d</sup>    | 26.2 <sup>a</sup>    | 22.8 <sup>a,b</sup>  | 24.2 <sup>a,b</sup>  | 21.4 <sup>b</sup>    | 23.2 <sup>a,b</sup>  | 9.8 <sup>d</sup>   | 12.4 <sup>d</sup>    |
| SE            |      | 1.69                  | 0.81                 | 1.17                 | 1.07                 | 0.74                 | 1.36                 | 1.29                 | 1.32                 | 0.92               | 0.93                 |
| Individuals a |      | 1757                  | 313                  | 543                  | 973                  | 518                  | 781                  | 671                  | 748                  | 228                | 476                  |
| Individuals m | 18.4 | 351.4 <sup>a</sup>    | 62.6 <sup>d</sup>    | 108.6 <sup>c,d</sup> | 194.6 <sup>b</sup>   | 103.6 <sup>c,d</sup> | 156.2 <sup>b,c</sup> | 134.2 <sup>b,c</sup> | 149.6 <sup>b,c</sup> | 45.6 <sup>d</sup>  | 95.2 <sup>c,d</sup>  |
| SE            |      | 49.80                 | 5.58                 | 9.22                 | 28.74                | 3.28                 | 10.69                | 9.87                 | 13.52                | 6.00               | 14.30                |
| 2013          | F    | FIE                   | FAL                  | GRO                  | SRC1 (3)             | SRC2 (4)             | SRC3 (2)             | SRC4 (2)             | HEA                  | FOR                | MEA                  |
| Species a     |      | 37                    | 29                   | 26                   | 38                   | 39                   | 34                   | 26                   | 37                   | 14                 | 22                   |
| Species m     | 23.3 | 21.8 <sup>a,b</sup>   | 13.4 <sup>c</sup>    | 13.8 <sup>c</sup>    | 24.8 <sup>a</sup>    | 22.4 <sup>a</sup>    | 18.8 <sup>b</sup>    | 14.2 <sup>c</sup>    | 23.0 <sup>a</sup>    | 9.4 <sup>d</sup>   | 11.8 <sup>c,d</sup>  |
| SE            |      | 0.80                  | 1.17                 | 0.97                 | 1.32                 | 1.03                 | 1.32                 | 0.58                 | 1.92                 | 0.51               | 0.97                 |
| Individuals a |      | 1319                  | 149                  | 914                  | 994                  | 1037                 | 406                  | 319                  | 865                  | 610                | 600                  |
| Individuals m | 17.6 | 263.8 <sup>a</sup>    | 29.8 <sup>d</sup>    | 182.8 <sup>b</sup>   | 198.8 <sup>b</sup>   | 207.4 <sup>b</sup>   | 81.2 <sup>c,d</sup>  | 63.8 <sup>d</sup>    | 173.0 <sup>b</sup>   | 122.0 <sup>c</sup> | 119.8 <sup>c</sup>   |
| SE            |      | 15.78                 | 4.90                 | 21.61                | 27.55                | 21.94                | 16.02                | 8.65                 | 22.02                | 14.25              | 6.61                 |
| 2014          | F    | FIE                   | FAL                  | GRO                  | SRC1 (4)             | SRC2 (1)             | SRC3 (3)             | SRC4 (3)             | HEA                  | FOR                | MEA                  |
| Species a     |      | 41                    | 42                   | 25                   | 36                   | 40                   | 28                   | 30                   | 43                   | 15                 | 26                   |
| Species m     | 29.4 | 26.2 <sup>a</sup>     | 22.0 <sup>b</sup>    | 15.4 <sup>c,d</sup>  | 24.2 <sup>a,b</sup>  | 26.2 <sup>a</sup>    | 16.4 <sup>c</sup>    | 17.4 <sup>c</sup>    | 27.0 <sup>a</sup>    | 11.4 <sup>d</sup>  | 14.6 <sup>c,d</sup>  |
| SE            |      | 0.74                  | 1.27                 | 0.81                 | 1.07                 | 0.58                 | 1.17                 | 1.44                 | 0.55                 | 0.75               | 1.57                 |
| Individuals a |      | 3438                  | 883                  | 1146                 | 1033                 | 1221                 | 893                  | 367                  | 1148                 | 723                | 964                  |
| Individuals m | 62.0 | 687.6 <sup>a</sup>    | 176.6 <sup>a,b</sup> | 229.2 <sup>b</sup>   | 206.6 <sup>a,b</sup> | 244.2 <sup>b</sup>   | 178.6 <sup>a,b</sup> | 73.4 <sup>d</sup>    | 229.6 <sup>b</sup>   | 144.6 <sup>c</sup> | 192.8 <sup>a,b</sup> |
| SE            |      | 29.79                 | 13.36                | 22.71                | 26.18                | 28.77                | 24.97                | 10.76                | 23.11                | 7.84               | 4.93                 |
| 2011 - 2014   | F    | FIE                   | FAL                  | GRO                  | SRC1                 | SRC2                 | SRC3                 | SRC4                 | HEA                  | FOR                | MEA                  |
| Species a     |      | 58                    | 56                   | 40                   | 58                   | 58                   | 61                   | 53                   | 65                   | 24                 | 37                   |
| Species m     | 62.3 | 38.8 <sup>b,c,d</sup> | 36.4 <sup>c,d</sup>  | 25.0 <sup>e</sup>    | 40.8 <sup>b</sup>    | 41.0 <sup>b</sup>    | 39.8 <sup>b,c</sup>  | 35.2 <sup>d</sup>    | 45.2 <sup>a</sup>    | 14.8 <sup>f</sup>  | 22.8 <sup>e</sup>    |
| SE            |      | 1.24                  | 1.54                 | 0.95                 | 0.37                 | 0.71                 | 1.32                 | 1.11                 | 1.91                 | 1.16               | 1.39                 |
| Individuals a |      | 9650                  | 2709                 | 3649                 | 6484                 | 7019                 | 4100                 | 3302                 | 4991                 | 1952               | 2761                 |
| Individuals m | 61.1 | 1930.0 <sup>a</sup>   | 541.8 <sup>e,f</sup> | 729.8 <sup>d,e</sup> | 1296.8 <sup>b</sup>  | 1403.8 <sup>b</sup>  | 820.0 <sup>d</sup>   | 660.4 <sup>d,e</sup> | 998.2 <sup>c</sup>   | 390.4 <sup>f</sup> | 552.0 <sup>e,f</sup> |
| SE            |      | 101.44                | 21.99                | 53.67                | 71.09                | 107.41               | 61.35                | 27.48                | 42.24                | 23.75              | 23.80                |
