# Supplementary material
Source: MDPI journal article supplement (https://www.mdpi.com/2073-445X/13/2/145)
Supplement: s1 [file s1]

|       |         | 2011                      | 2012              | 2013                | 2014              |
|-------|---------|---------------------------|-------------------|---------------------|-------------------|
| Plots | F-value | stenotopic forest species |                   |                     |                   |
| SRC1  | 29,00   | 1,23 <sup>c</sup>         | 1,56 <sup>b</sup> | 1,51 <sup>b</sup>   | 2,08 <sup>a</sup> |
| SRC2  | 4,24    | 1,39 <sup>b</sup>         | 1,31 <sup>b</sup> | 1,39 <sup>b</sup>   | 1,61 <sup>a</sup> |
| SRC3  | 21,41   | 1,63 <sup>b</sup>         | 1,24 <sup>c</sup> | 1,50 <sup>b</sup>   | 1,87 <sup>a</sup> |
| SRC4  | 21,55   | 1,89 <sup>a</sup>         | 0,85 <sup>c</sup> | 1,01 <sup>b,c</sup> | 1,23 <sup>b</sup> |
| Plots | F-value | eurytopic forest species  |                   |                     |                   |
| SRC1  | 16,90   | 1,77 <sup>a</sup>         | 1,66 <sup>a</sup> | 1,40 <sup>b</sup>   | 1,29 <sup>b</sup> |
| SRC2  | 51,80   | 1,99 <sup>a</sup>         | 1,46 <sup>b</sup> | 1,13 <sup>c</sup>   | 1,57 <sup>b</sup> |
| SRC3  | 2,99    | 1,54 <sup>a</sup>         | 1,60 <sup>a</sup> | 1,54 <sup>a</sup>   | 1,31 <sup>b</sup> |
| SRC4  | 132,89  | 1,92 <sup>a</sup>         | 1,75 <sup>b</sup> | 1,82 <sup>b</sup>   | 1,12 <sup>c</sup> |
