# Supplementary material
Source: MDPI journal article supplement (https://www.mdpi.com/2073-445X/13/2/145)
Supplement: s1 [file s1]

| 2011                | F     | FIE                  | FAL                  | GRO                  | SRC1 (1)              | SRC2 (2)             | SRC3 (3)              | SRC4 (3)             | HEA                  | FOR                   | MEA                |
|---------------------|-------|----------------------|----------------------|----------------------|-----------------------|----------------------|-----------------------|----------------------|----------------------|-----------------------|--------------------|
| Log series $\alpha$ | 4.9   | 5.9 <sup>b</sup>     | 9.0 <sup>a</sup>     | 9.0 <sup>a</sup>     | 9.4 <sup>a</sup>      | 8.3 <sup>a</sup>     | 8.6 <sup>a</sup>      | 8.4 <sup>a</sup>     | 5.4 <sup>b</sup>     | 9.9 <sup>a</sup>      | 5.4 <sup>b</sup>   |
| Shan-Expo           | 15.9  | 3.6 <sup>d</sup>     | 10.6 <sup>b</sup>    | 11.4 <sup>b</sup>    | 14.4 <sup>a</sup>     | 11.3 <sup>b</sup>    | 12.4 <sup>a,b</sup>   | 10.2 <sup>b</sup>    | 7.5 <sup>c</sup>     | 10.2 <sup>b</sup>     | 6.3 <sup>c</sup>   |
| Shannon             | 40.1  | 1.4 <sup>e</sup>     | 2.4 <sup>b</sup>     | 2.5 <sup>b</sup>     | 2.7 <sup>a</sup>      | 2.5 <sup>a,b</sup>   | 2.6 <sup>a,b</sup>    | 2.4 <sup>b</sup>     | 2.1 <sup>c</sup>     | 2.4 <sup>b</sup>      | 1.9 <sup>d</sup>   |
| Evenness            | 91.9  | 0.4 <sup>f</sup>     | 0.7 <sup>c,d</sup>   | 0.8 <sup>b</sup>     | 0.8 <sup>b</sup>      | 0.7 <sup>c</sup>     | 0.8 <sup>b</sup>      | 0.7 <sup>c</sup>     | 0.7 <sup>d</sup>     | 0.9 <sup>a</sup>      | 0.6 <sup>e</sup>   |
| Simpson             | 18.0  | 2.0 <sup>g</sup>     | 6.4 <sup>d,e</sup>   | 8.2 <sup>b,c,d</sup> | 10.4 <sup>a</sup>     | 8.7 <sup>a,b,c</sup> | 9.2 <sup>a,b</sup>    | 7.0 <sup>c,d</sup>   | 5.1 <sup>e,f</sup>   | 8.9 <sup>a,b,c</sup>  | 3.8 <sup>f</sup>   |
| 2012                | F     | FIE                  | FAL                  | GRO                  | SRC1 (1)              | SRC2 (2)             | SRC3 (3)              | SRC4 (3)             | HEA                  | FOR                   | MEA                |
| Log series $\alpha$ | 9.1   | 5.4 <sup>e,f</sup>   | 10.2 <sup>a</sup>    | 8.3 <sup>b,c,d</sup> | 8.9 <sup>a,b,c</sup>  | 9.5 <sup>a,b</sup>   | 7.5 <sup>c,d</sup>    | 6.6 <sup>d,e,f</sup> | 4.8 <sup>f</sup>     | 7.2 <sup>c,d,e</sup>  | 5.4 <sup>e,f</sup> |
| Shan-Expo           | 18.1  | 5.2 <sup>c</sup>     | 12.2 <sup>a</sup>    | 9.0 <sup>b</sup>     | 14.2 <sup>a</sup>     | 13.6 <sup>a</sup>    | 13.1 <sup>a</sup>     | 9.8 <sup>b</sup>     | 7.9 <sup>b</sup>     | 8.4 <sup>b</sup>      | 5.1 <sup>c</sup>   |
| Shannon             | 26.0  | 1.7 <sup>d</sup>     | 2.6 <sup>a</sup>     | 2.2 <sup>b</sup>     | 2.6 <sup>a</sup>      | 2.6 <sup>a</sup>     | 2.5 <sup>a</sup>      | 2.3 <sup>b</sup>     | 2.0 <sup>c</sup>     | 2.3 <sup>b</sup>      | 1.7 <sup>d</sup>   |
| Evenness            | 23.5  | 0.5 <sup>c</sup>     | 0.8 <sup>a</sup>     | 0.8 <sup>a</sup>     | 0.8 <sup>a</sup>      | 0.8 <sup>a</sup>     | 0.8 <sup>a</sup>      | 0.7 <sup>a</sup>     | 0.7 <sup>b</sup>     | 0.8 <sup>a</sup>      | 0.5 <sup>c</sup>   |
| Simpson             | 15.7  | 2.8 <sup>e</sup>     | 8.2 <sup>a,b,c</sup> | 6.7 <sup>c,d</sup>   | 9.6 <sup>a</sup>      | 9.9 <sup>a</sup>     | 8.9 <sup>a,b</sup>    | 6.7 <sup>c,d</sup>   | 5.0 <sup>d</sup>     | 7.2 <sup>b,c</sup>    | 2.8 <sup>e</sup>   |
| 2013                | F     | FIE                  | FAL                  | GRO                  | SRC1 (1)              | SRC2 (2)             | SRC3 (3)              | SRC4 (3)             | HEA                  | FOR                   | MEA                |
| Log series $\alpha$ | 7.8   | 5.5 <sup>b,c</sup>   | 6.9 <sup>b,c</sup>   | 7.2 <sup>b</sup>     | 9.5 <sup>a</sup>      | 10.3 <sup>a</sup>    | 6.6 <sup>b,c</sup>    | 7.0 <sup>b,c</sup>   | 5.7 <sup>b,c</sup>   | 5.1 <sup>c</sup>      | 5.2 <sup>b,c</sup> |
| Shan-Expo           | 15.0  | 8.1 <sup>b,c,d</sup> | 8.2 <sup>b,c,d</sup> | 9.0 <sup>b,c</sup>   | 13.4 <sup>a</sup>     | 14.3 <sup>a</sup>    | 10.6 <sup>b</sup>     | 6.4 <sup>d,e</sup>   | 6.7 <sup>c,d,e</sup> | 5.7 <sup>d,e</sup>    | 5.2 <sup>e</sup>   |
| Shannon             | 11.3  | 2.1 <sup>c,d,e</sup> | 2.2 <sup>c,d</sup>   | 2.3 <sup>b,c</sup>   | 2.6 <sup>a,b</sup>    | 2.7 <sup>a</sup>     | 2.4 <sup>b,c</sup>    | 1.9 <sup>d,e,f</sup> | 1.9 <sup>e,f</sup>   | 1.9 <sup>d,e,f</sup>  | 1.7 <sup>f</sup>   |
| Evenness            | 15.1  | 0.7 <sup>c,d</sup>   | 0.8 <sup>b,c</sup>   | 0.8 <sup>b,c</sup>   | 0.8 <sup>a,b</sup>    | 0.9 <sup>a</sup>     | 0.8 <sup>a,b</sup>    | 0.7 <sup>d,e</sup>   | 0.6 <sup>e,f</sup>   | 0.8 <sup>b,c</sup>    | 0.6 <sup>f</sup>   |
| Simpson             | 12.6  | 5.63 <sup>c,d</sup>  | 6.2 <sup>b,c</sup>   | 6.9 <sup>b,c</sup>   | 8.3 <sup>b</sup>      | 11.3 <sup>a</sup>    | 7.3 <sup>b,c</sup>    | 3.5 <sup>d,e</sup>   | 3.7 <sup>d,e</sup>   | 5.2 <sup>c,d,e</sup>  | 3.2 <sup>e</sup>   |
| 2014                | F     | FIE                  | FAL                  | GRO                  | SRC1 (1)              | SRC2 (2)             | SRC3 (3)              | SRC4 (3)             | HEA                  | FOR                   | MEA                |
| Log series $\alpha$ | 6.8   | 7.2 <sup>c,d,e</sup> | 13.2 <sup>a</sup>    | 6.5 <sup>d,e</sup>   | 10.2 <sup>b</sup>     | 9.5 <sup>b,c</sup>   | 8.7 <sup>b,c,d</sup>  | 9.4 <sup>b,c</sup>   | 9.0 <sup>b,c,d</sup> | 8.0 <sup>b,c,d</sup>  | 5.1 <sup>e</sup>   |
| Shan-Expo           | 6.6   | 9.2 <sup>c,d</sup>   | 16.5 <sup>a</sup>    | 8.4 <sup>d,e</sup>   | 13.0 <sup>a,b,c</sup> | 14.8 <sup>a,b</sup>  | 11.7 <sup>b,c,d</sup> | 10.2 <sup>c,d</sup>  | 7.8 <sup>d,e</sup>   | 11.0 <sup>b,c,d</sup> | 5.1 <sup>e</sup>   |
| Shannon             | 32.3  | 2.0 <sup>d</sup>     | 2.9 <sup>a</sup>     | 2.1 <sup>d</sup>     | 2.5 <sup>b,c</sup>    | 2.6 <sup>b</sup>     | 2.5 <sup>b,c</sup>    | 2.3 <sup>c</sup>     | 1.9 <sup>d</sup>     | 2.4 <sup>b,c</sup>    | 1.6 <sup>e</sup>   |
| Evenness            | 39.9  | 0.6 <sup>c</sup>     | 0.8 <sup>a</sup>     | 0.7 <sup>c</sup>     | 0.8 <sup>b</sup>      | 0.8 <sup>b</sup>     | 0.8 <sup>a,b</sup>    | 0.8 <sup>a</sup>     | 0.5 <sup>d</sup>     | 0.8 <sup>a,b</sup>    | 0.5 <sup>d</sup>   |
| Simpson             | 31.0  | 4.2 <sup>c,d</sup>   | 12.3 <sup>a</sup>    | 5.6 <sup>c</sup>     | 7.9 <sup>b</sup>      | 8.9 <sup>b</sup>     | 8.4 <sup>b</sup>      | 7.2 <sup>b</sup>     | 3.1 <sup>d</sup>     | 7.7 <sup>b</sup>      | 2.6 <sup>d</sup>   |
| 2011 - 2014         | F     | FIE                  | FAL                  | GRO                  | SRC1 (1)              | SRC2 (2)             | SRC3 (3)              | SRC4 (3)             | HEA                  | FOR                   | MEA                |
| Log series $\alpha$ | 17.6  | 8.1 <sup>d</sup>     | 14.4 <sup>a</sup>    | 11.3 <sup>c</sup>    | 14.1 <sup>a</sup>     | 13.2 <sup>a,b</sup>  | 11.4 <sup>c</sup>     | 11.2 <sup>c</sup>    | 8.7 <sup>d</sup>     | 11.8 <sup>b,c</sup>   | 7.0 <sup>d</sup>   |
| Shan-Expo           | 25.5  | 6.5 <sup>e,f</sup>   | 11.9 <sup>b</sup>    | 9.4 <sup>c</sup>     | 13.7 <sup>a</sup>     | 13.5 <sup>a,b</sup>  | 11.9 <sup>b</sup>     | 9.2 <sup>c</sup>     | 7.4 <sup>d,e</sup>   | 8.8 <sup>c,d</sup>    | 5.4 <sup>f</sup>   |
| Shannon             | 222.9 | 1.9 <sup>f</sup>     | 2.9 <sup>c</sup>     | 2.5 <sup>d</sup>     | 3.1 <sup>a</sup>      | 3.0 <sup>b</sup>     | 3.0 <sup>b</sup>      | 2.8 <sup>c</sup>     | 2.3 <sup>e</sup>     | 2.8 <sup>c</sup>      | 1.8 <sup>g</sup>   |
| Evenness            | 136.5 | 0.5 <sup>f</sup>     | 0.7 <sup>c</sup>     | 0.7 <sup>d</sup>     | 0.8 <sup>a</sup>      | 0.7 <sup>b</sup>     | 0.8 <sup>a</sup>      | 0.7 <sup>b</sup>     | 0.6 <sup>e</sup>     | 0.8 <sup>a,b</sup>    | 0.5 <sup>f</sup>   |
| Simpson             | 86.9  | 3.0 <sup>g</sup>     | 9.5 <sup>d</sup>     | 7.3 <sup>e</sup>     | 14.9 <sup>a</sup>     | 13.6 <sup>a,b</sup>  | 13.3 <sup>b</sup>     | 9.4 <sup>d</sup>     | 5.2 <sup>f</sup>     | 10.9 <sup>c</sup>     | 3.0 <sup>g</sup>   |
