# Supplementary material
Source: MDPI journal article supplement (https://www.mdpi.com/2073-445X/13/2/145)
Supplement: s1 [file s1]

|       | 2011 |      |       |      | 2012 |      |       |     | 2013 |      |       |      | 2014 |      |       |      |
|-------|------|------|-------|------|------|------|-------|-----|------|------|-------|------|------|------|-------|------|
|       | eury |      | steno |      | eury |      | steno |     | eury |      | steno |      | eury |      | steno |      |
|       | Ind  | Dom  | Ind   | Dom  | Ind  | Dom  | Ind   | Dom | Ind  | Dom  | Ind   | Dom  | Ind  | Dom  | Ind   | Dom  |
| Plots |      |      |       |      |      |      |       |     |      |      |       |      |      |      |       |      |
| SRC1  | 417  | 100  | 0     | 0,0  | 141  | 96,6 | 5     | 3,4 | 264  | 95,7 | 12    | 4,4  | 297  | 76,0 | 94    | 24,0 |
| SRC2  | 292  | 98,7 | 4     | 1,4  | 154  | 93,3 | 11    | 6,7 | 512  | 83,1 | 104   | 16,9 | 127  | 63,2 | 74    | 36,8 |
| SRC3  | 542  | 97,7 | 13    | 2,3  | 136  | 94,4 | 8     | 5,6 | 138  | 77,1 | 41    | 22,9 | 179  | 27,3 | 477   | 72,7 |
| SRC4  | 745  | 82,4 | 159   | 17,6 | 72   | 92,3 | 6     | 7,7 | 121  | 96,8 | 4     | 3,2  | 170  | 97,1 | 5     | 2,9  |
