# Supplementary material
Source: MDPI journal article supplement (https://www.mdpi.com/2073-445X/13/2/145)
Supplement: s1 [file s1]

| Arable field species (FIE); df: 5, 74                                               |                |       |         |        |
|-------------------------------------------------------------------------------------|----------------|-------|---------|--------|
| Model overview                                                                      | R <sup>2</sup> | SE    | F       | p      |
| Statistics <sub>HAC</sub>                                                           | 0.652          | 6.091 | 5.540   | <0.001 |
| Coefficients <sub>HAC</sub>                                                         | B              | SE    | t       | p      |
| Shade [%]                                                                           | -0.401         | 0.124 | -3.234  | 0.002  |
| Herb [%]                                                                            | 0.489          | 0.170 | 2.873   | 0.005  |
| Grass [%]                                                                           | -0.016         | 0.065 | -0.251  | 0.803  |
| Litter [%]                                                                          | 0.304          | 0.111 | 2.745   | 0.008  |
| Open ground [%]                                                                     | 0.150          | 0.059 | 2.538   | 0.013  |
| Grassland species (GRL); df: 5, 74                                                  |                |       |         |        |
| Model overview                                                                      | R <sup>2</sup> | SE    | F       | p      |
| Statistics <sub>HAC</sub>                                                           | 0.491          | 4.212 | 25.381  | <0.001 |
| Coefficients <sub>HAC</sub>                                                         | B              | SE    | t       | p      |
| Shade [%]                                                                           | -0.131         | 0.036 | -3.671  | <0.001 |
| Herb [%]                                                                            | -0.036         | 0.121 | -0.299  | 0.766  |
| Grass [%]                                                                           | 0.180          | 0.043 | 4.206   | <0.001 |
| Litter [%]                                                                          | 0.022          | 0.050 | 0.446   | 0.657  |
| Open ground [%]                                                                     | 0.063          | 0.034 | 1.821   | 0.073  |
| Species of open, dry habitats (DRY) <sup>1)</sup> ; df: 5, 72                       |                |       |         |        |
| Model overview                                                                      | R <sup>2</sup> | SE    | F       | p      |
| Statistics <sub>HAC</sub>                                                           | 0.332          | 2.901 | 25.445  | <0.001 |
| Coefficients <sub>HAC</sub>                                                         | B              | SE    | t       | p      |
| Shade [%]                                                                           | -0.043         | 0.021 | -1.986  | 0.051  |
| Herb [%]                                                                            | -0.008         | 0.076 | -0.105  | 0.917  |
| Grass [%]                                                                           | -0.125         | 0.037 | -3.407  | 0.001  |
| Litter [%]                                                                          | -0.067         | 0.027 | -2.510  | 0.014  |
| Open ground [%]                                                                     | 0.013          | 0.034 | 0.375   | 0.709  |
| Forest species, in general (FOR); df: 5, 74                                         |                |       |         |        |
| Model overview                                                                      | R <sup>2</sup> | SE    | F       | p      |
| Statistics <sub>HAC</sub>                                                           | 0.223          | 6.923 | 15.054  | <0.001 |
| Coefficients <sub>HAC</sub>                                                         | B              | SE    | t       | p      |
| Shade [%]                                                                           | 0.060          | 0.104 | 0.574   | 0.567  |
| Herb [%]                                                                            | 0.238          | 0.164 | 1.448   | 0.152  |
| Grass [%]                                                                           | 0.163          | 0.068 | 2.381   | 0.020  |
| Litter [%]                                                                          | 0.189          | 0.075 | 2.504   | 0.015  |
| Open ground [%]                                                                     | 0.077          | 0.072 | 1.067   | 0.290  |
| Group of species with different habitat preferences (MIX) <sup>2)</sup> ; df: 5, 72 |                |       |         |        |
| Model overview                                                                      | R <sup>2</sup> | SE    | F       | p      |
| Statistics <sub>HAC</sub>                                                           | 0.515          | 1.687 | 134.144 | <0.001 |
| Coefficients <sub>HAC</sub>                                                         | B              | SE    | t       | p      |
| Shade [%]                                                                           | 0.086          | 0.011 | 7.944   | <0.001 |
| Herb [%]                                                                            | -0.214         | 0.026 | -8.245  | <0.001 |
| Grass [%]                                                                           | -0.087         | 0.039 | -2.239  | 0.028  |
| Litter [%]                                                                          | -0.193         | 0.012 | -16.676 | <0.001 |
| Open ground [%]                                                                     | -0.167         | 0.020 | -8.492  | <0.001 |

1) After elimination of the outlier in SRC2 trap2 2011. outlier test +/- 3 SD

2) After elimination of the outlier in SRC4 trap4 2013. outlier test +/- 3 SD
