# Supplementary material
Source: MDPI journal article supplement (https://www.mdpi.com/2073-445X/13/2/145)
Supplement: s1 [file s1]

| Species                               | Author                        | Ind  | ET   | HP  |
|---------------------------------------|-------------------------------|------|------|-----|
| <i>Abax ovalis</i>                    | (Duftschmid, 1812)            | 371  | (h)f | MFO |
| <i>Abax parallelepipedus</i>          | (Piller & Mitterpacher, 1783) | 1725 | (f)  | FOR |
| <i>Abax parallelus</i>                | (Duftschmid, 1812)            | 2    | (h)f | LMF |
| <i>Acupalpus meridianus</i>           | (Linnaeus, 1760)              | 6    | (h)  | FIE |
| <i>Agonum emarginatum</i>             | (Gyllenhal, 1827)             | 1    | h(f) | VRB |
| <i>Agonum fuliginosum</i>             | (Panzer, 1809)                | 2    | h(f) | REE |
| <i>Agonum muelleri</i>                | (Herbst, 1784)                | 259  | (h)  | LOB |
| <i>Agonum sexpunctatum</i>            | (Linnaeus, 1758)              | 119  | (h)  | RSO |
| <i>Agonum viduum</i>                  | (Panzer, 1796)                | 2    | h    | REE |
| <i>Amara aenea</i>                    | (De Geer, 1774)               | 100  | x(f) | ODH |
| <i>Amara apricaria</i>                | (Paykull, 1790)               | 147  | (h)  | PIO |
| <i>Amara aulica</i>                   | (Panzer, 1796)                | 80   | (x)  | VYA |
| <i>Amara bifrons</i>                  | (Gyllenhal, 1810)             | 4    | (x)  | FIE |
| <i>Amara communis</i>                 | (Panzer, 1797)                | 337  | h    | WME |
| <i>Amara consularis</i>               | (Duftschmid, 1812)            | 269  | (x)  | GRL |
| <i>Amara convexior</i>                | Stephens, 1828                | 28   | x    | CGL |
| <i>Amara eurynota</i>                 | (Panzer, 1796)                | 1    | x    | CGL |
| <i>Amara familiaris</i>               | (Duftschmid, 1812)            | 18   | (x)  | GRL |
| <i>Amara littorea</i>                 | C.G. Thomson, 1857            | 33   | (h)  | FIE |
| <i>Amara lunicollis</i>               | Schiödte, 1837                | 954  | (h)  | GRL |
| <i>Amara ovata</i>                    | (Fabricius, 1792)             | 36   | (h)  | GRL |
| <i>Amara plebeja</i>                  | (Gyllenhal, 1810)             | 10   | h    | WME |
| <i>Amara similata</i>                 | (Gyllenhal, 1810)             | 91   | (h)  | PAS |
| <i>Anchomenus dorsalis</i>            | (Pontoppidan, 1763)           | 1897 | (h)  | FIE |
| <i>Anisodactylus binotatus</i>        | (Fabricius, 1787)             | 25   | eu   | NHP |
| <i>Asaphidion flavipes</i>            | (Linnaeus, 1760)              | 21   | (h)  | SBA |
| <i>Asaphidion pallipes</i>            | (Duftschmid, 1812)            | 3    | (h)  | SBA |
| <i>Badister bullatus</i>              | (Schränk, 1798)               | 21   | x    | CGL |
| <i>Badister lacertosus</i>            | Sturm, 1815                   | 19   | h(f) | WFO |
| <i>Bembidion guttula</i>              | (Fabricius, 1792)             | 2    | h    | WME |
| <i>Bembidion lampros</i>              | (Herbst, 1784)                | 3168 | (x)  | FIE |
| <i>Bembidion obtusum</i>              | Audinet-Serville, 1821        | 1844 | (h)  | GRL |
| <i>Bembidion properans</i>            | (Stephens, 1828)              | 83   | (x)  | FIE |
| <i>Bembidion quadrimaculatum</i>      | (Linnaeus, 1760)              | 61   | (x)  | FIE |
| <i>Bembidion tetracolum</i>           | Say, 1823                     | 1    | eu   | FIE |
| <i>Brachinus crepitans</i>            | (Linnaeus, 1758)              | 869  | x    | CGL |
| <i>Bradycellus csikii</i>             | Laczó, 1912                   | 29   | (x)  | FAL |
| <i>Calathus ambiguus</i>              | (Paykull, 1790)               | 2    | x    | DGL |
| <i>Calathus cinctus</i>               | Motschulsky, 1850             | 1    | x    | DGL |
| <i>Calathus fuscipes</i>              | (Goeze, 1777)                 | 254  | x    | ODH |
| <i>Calathus melanocephalus</i>        | (Linnaeus, 1758)              | 253  | x    | ODH |
| <i>Calathus micropterus</i>           | (Duftschmid, 1812)            | 1    | (x)f | AFO |
| <i>Calathus rotundicollis</i>         | Dejean, 1828                  | 560  | f    | FOR |
| <i>Calosoma inquisitor</i>            | (Linnaeus, 1758)              | 3    | (h)f | MFO |
| <i>Carabus auratus</i>                | (Linnaeus, 1760)              | 140  | (x)  | GRL |
| <i>Carabus auronitens</i>             | Fabricius, 1792               | 2    | (h)f | LMF |
| <i>Carabus cancellatus</i>            | Illiger, 1798                 | 6    | (h)  | FIE |
| <i>Carabus granulatus</i>             | Linnaeus, 1758                | 15   | h(f) | OWH |
| <i>Carabus nemoralis</i>              | O.F. Müller, 1764             | 132  | (f)  | FOR |
| <i>Carabus problematicus</i>          | Herbst, 1768                  | 138  | f    | FOR |
| <i>Carabus violaceus purpurascens</i> | Fabricius, 1787               | 757  | f    | FOR |
| <i>Chlaenius nigricornis</i>          | (Fabricius, 1787)             | 1    | h    | WME |
| <i>Cicindela campestris</i>           | Linnaeus, 1758                | 4    | (x)  | RSO |

|                                       |                    |      |      |     |
|---------------------------------------|--------------------|------|------|-----|
| <i>Clivina collaris</i>               | (Herbst, 1784)     | 8    | (h)  | SBA |
| <i>Clivina fossor</i>                 | (Linnaeus, 1758)   | 606  | eu   | OHA |
| <i>Demetrias atricapillus</i>         | (Linnaeus, 1758)   | 3    | (h)  | FIE |
| <i>Diachromus germanus</i>            | (Linnaeus, 1758)   | 1    | (h)  | GRL |
| <i>Dyschirius globosus</i>            | (Herbst, 1784)     | 3    | eu   | NHP |
| <i>Harpalus affinis</i>               | (Schränk, 1781)    | 1023 | x    | ODH |
| <i>Harpalus calceatus</i>             | (Duftschmid, 1812) | 4    | x    | DGL |
| <i>Harpalus distinguendus</i>         | (Duftschmid, 1812) | 53   | (x)  | FIE |
| <i>Harpalus griseus</i>               | (Panzer, 1796)     | 1    | x    | DGL |
| <i>Harpalus laevipes</i>              | Zetterstedt, 1828  | 1    | f    | FOR |
| <i>Harpalus latus</i>                 | (Linnaeus, 1758)   | 161  | eu   | OHA |
| <i>Harpalus luteicornis</i>           | (Duftschmid, 1812) | 61   | (h)  | PAS |
| <i>Harpalus rubripes</i>              | (Duftschmid, 1812) | 60   | x    | ODH |
| <i>Harpalus rufipalpis</i>            | Sturm 1818         | 1    | x    | DGL |
| <i>Harpalus rufipes</i>               | (De Geer, 1774)    | 5081 | (x)  | FIE |
| <i>Harpalus signaticornis</i>         | (Duftschmid, 1812) | 1    | x    | CGL |
| <i>Harpalus smaragdinus</i>           | (Duftschmid, 1812) | 9    | x    | DGL |
| <i>Harpalus solitarius</i>            | Dejean, 1829       | 1    | (x)f | PFO |
| <i>Harpalus tardus</i>                | (Panzer, 1796)     | 2    | x    | ODH |
| <i>Leistus ferrugineus</i>            | (Linnaeus, 1758)   | 21   | (f)  | FOR |
| <i>Leistus rufomarginatus</i>         | (Duftschmid, 1812) | 19   | f    | FOR |
| <i>Limodromus assimilis</i>           | (Paykull, 1790)    | 1034 | hf   | WFO |
| <i>Loricera pilicornis</i>            | (Fabricius, 1775)  | 550  | eu   | OHA |
| <i>Microlestes minutulus</i>          | (Goeze, 1777)      | 2    | (x)  | RSO |
| <i>Nebria brevicollis</i>             | (Fabricius, 1792)  | 3580 | (f)  | FOR |
| <i>Notiophilus aestuans</i>           | Dejean, 1826       | 1    | (h)  | RSO |
| <i>Notiophilus aquaticus</i>          | (Linnaeus, 1758)   | 1    | x    | CGL |
| <i>Notiophilus biguttatus</i>         | (Fabricius, 1779)  | 563  | f    | FOR |
| <i>Notiophilus palustris</i>          | (Duftschmid, 1812) | 40   | x    | CGL |
| <i>Olisthopus rotundatus</i>          | (Paykull, 1790)    | 3    | x    | DGL |
| <i>Ophonus rufibarbis</i>             | (Fabricius, 1792)  | 3    | (x)  | GRL |
| <i>Oxytelus obscurus</i>              | (Herbst, 1784)     | 71   | h(f) | REE |
| <i>Panagaeus bipustulatus</i>         | (Fabricius, 1775)  | 6    | x    | ODH |
| <i>Paradromius linearis</i>           | (Olivier, 1795)    | 1    | x    | CGL |
| <i>Poecilus cupreus</i>               | (Linnaeus, 1758)   | 3767 | (x)  | GRL |
| <i>Poecilus versicolor</i>            | (Sturm, 1824)      | 3994 | (h)  | PAS |
| <i>Pterostichus burmeisteri burm.</i> | Heer, 1838         | 513  | (h)f | MFO |
| <i>Pterostichus melanarius</i>        | (Illiger, 1798)    | 6382 | eu   | FIE |
| <i>Pterostichus niger</i>             | (Schaller, 1783)   | 1898 | f    | FOR |
| <i>Pterostichus nigrata</i>           | (Paykull, 1790)    | 1    | h(f) | VRB |
| <i>Pterostichus oblongopunctatus</i>  | (Fabricius, 1787)  | 728  | f    | FOR |
| <i>Pterostichus strenuus</i>          | (Panzer, 1796)     | 443  | h(f) | VRB |
| <i>Pterostichus vernalis</i>          | (Panzer, 1796)     | 292  | h    | WME |
| <i>Stomis pumicatus</i>               | (Panzer, 1796)     | 99   | h    | WME |
| <i>Synuchus vivalis</i>               | (Illiger, 1798)    | 126  | h    | WME |
| <i>Trechoblemus micros</i>            | (Herbst, 1784)     | 3    | h    | FEN |
| <i>Trechus obtusus</i>                | Erichson, 1837     | 22   | h    | VRB |
| <i>Trechus quadristriatus</i>         | (Schränk, 1781)    | 458  | eu   | FIE |
| <i>Trichotichnus laevicollis</i>      | (Duftschmid, 1812) | 7    | (h)f | LMF |
| <i>Trichotichnus nitens</i>           | (Heer, 1837)       | 2    | f    | FOR |
