# Supplementary material
Source: MDPI journal article supplement (https://www.mdpi.com/2073-445X/13/2/145)
Supplement: s1 [file s1]

| xerophilic species of open land (x); df: 5, 74                 |                |       |        |        |
|----------------------------------------------------------------|----------------|-------|--------|--------|
| Model overview                                                 | R <sup>2</sup> | SE    | F      | p      |
| Statistics <sub>HAC</sub>                                      | 0.496          | 2.171 | 99.579 | <0.001 |
| Coefficients <sub>HAC</sub>                                    | B              | SE    | t      | p      |
| Shade [%]                                                      | -0.111         | 0.023 | -4.761 | <0.001 |
| Herb [%]                                                       | -0.267         | 0.076 | -3.498 | 0.001  |
| Grass [%]                                                      | -0.196         | 0.052 | -3.789 | <0.001 |
| Litter [%]                                                     | -0.151         | 0.046 | -3.306 | 0.002  |
| Open ground [%]                                                | -0.051         | 0.057 | 0.890  | 0.377  |
| hygrophilic species of open land (h) <sup>1)</sup> ; df: 5, 73 |                |       |        |        |
| Model overview                                                 | R <sup>2</sup> | SE    | F      | p      |
| Statistics <sub>HAC</sub>                                      | 0.320          | 3.586 | 27.810 | <0.001 |
| Coefficients <sub>HAC</sub>                                    | B              | SE    | t      | p      |
| Shade [%]                                                      | -0.003         | 0.019 | -0.131 | 0.896  |
| Herb [%]                                                       | -0.110         | 0.079 | -1.404 | 0.165  |
| Grass [%]                                                      | -0.056         | 0.044 | -1.267 | 0.209  |
| Litter [%]                                                     | -0.127         | 0.032 | -3.932 | <0.001 |
| Open ground [%]                                                | 0.013          | 0.024 | -0.556 | 0.580  |
| eurytopic species of open land (eu) <sup>2)</sup> ; df: 5, 73  |                |       |        |        |
| Model overview                                                 | R <sup>2</sup> | SE    | F      | p      |
| Statistics <sub>HAC</sub>                                      | 0.396          | 1.964 | 7.460  | <0.001 |
| Coefficients <sub>HAC</sub>                                    | B              | SE    | t      | p      |
| Shade [%]                                                      | -0.021         | 0.010 | -2.185 | 0.032  |
| Herb [%]                                                       | -0.008         | 0.035 | -0.239 | 0.812  |
| Grass [%]                                                      | -0.115         | 0.037 | -3.100 | 0.003  |
| Litter [%]                                                     | -0.089         | 0.023 | -3.826 | <0.001 |
| Open ground [%]                                                | -0.065         | 0.029 | -2.230 | 0.030  |
| hygrophilic forest species (hf); df: 5, 74                     |                |       |        |        |
| Model overview                                                 | R <sup>2</sup> | SE    | F      | p      |
| Statistics <sub>HAC</sub>                                      | 0.447          | 2.803 | 26.838 | <0.001 |
| Coefficients <sub>HAC</sub>                                    | B              | SE    | t      | p      |
| Shade [%]                                                      | -0.084         | 0.026 | -3.207 | 0.002  |
| Herb [%]                                                       | -0.196         | 0.068 | -2.898 | 0.005  |
| Grass [%]                                                      | 0.157          | 0.106 | 1.476  | 0.144  |
| Litter [%]                                                     | -0.030         | 0.045 | -0.657 | 0.513  |
| Open ground [%]                                                | -0.149         | 0.043 | -3.447 | 0.001  |
| slightly hygrophilic forest species ((h)f); df: 5, 74          |                |       |        |        |
| Model overview                                                 | R <sup>2</sup> | SE    | F      | p      |
| Statistics <sub>HAC</sub>                                      | 0.518          | 4.779 | 24.270 | <0.001 |
| Coefficients <sub>HAC</sub>                                    | B              | SE    | t      | p      |
| Shade [%]                                                      | 0.144          | 0.049 | 2.968  | 0.004  |
| Herb [%]                                                       | 0.342          | 0.092 | 3.732  | <0.001 |
| Grass [%]                                                      | 0.091          | 0.154 | 0.587  | 0.559  |
| Litter [%]                                                     | 0.210          | 0.092 | 2.297  | 0.025  |
| Open ground [%]                                                | 0.077          | 0.071 | 1.077  | 0.285  |
| slightly xerophilic forest species ((x)f); df: 5, 74           |                |       |        |        |
| Model overview                                                 | R <sup>2</sup> | SE    | F      | p      |
| Statistics <sub>HAC</sub>                                      | 0.358          | 2.837 | 30.715 | <0.001 |
| Coefficients <sub>HAC</sub>                                    | B              | SE    | t      | p      |
| Shade [%]                                                      | -0.037         | 0.018 | -2.045 | 0.044  |
| Herb [%]                                                       | 0.195          | 0.081 | 2.416  | 0.018  |
| Grass [%]                                                      | 0.031          | 0.030 | 1.032  | 0.306  |
| Litter [%]                                                     | 0.097          | 0.033 | 2.892  | 0.005  |
| Open ground [%]                                                | 0.194          | 0.045 | 4.339  | <0.001 |

1) After elimination of the outlier in SRC1 trap3 2013. outlier test +/- 3 SD

2) After elimination of the outlier in SRC4 trap4 2014. outlier test +/- 3 SD
