# Supplementary material
Source: MDPI journal article supplement (https://www.mdpi.com/2073-445X/13/2/145)
Supplement: s1 [file s1]

| 2011        | F    | FIE                 | FAL                 | GRO                | SRC1 (1)               | SRC2 (2)               | SRC3 (3)            | SRC4 (3)             | HEA                  | FOR                  | MEA                  |
|-------------|------|---------------------|---------------------|--------------------|------------------------|------------------------|---------------------|----------------------|----------------------|----------------------|----------------------|
| No. HP      | 21.2 | 9.4 <sup>b,c</sup>  | 10.6 <sup>a,b</sup> | 7.8 <sup>c,d</sup> | 10.6 <sup>a,b</sup>    | 12.0 <sup>a</sup>      | 12.0 <sup>a</sup>   | 11.0 <sup>a,b</sup>  | 9.6 <sup>b,c</sup>   | 2.6 <sup>e</sup>     | 6.4 <sup>d</sup>     |
| Alpha       | 13.7 | 1.6 <sup>d,e</sup>  | 2.2 <sup>a,b</sup>  | 1.6 <sup>d,e</sup> | 1.8 <sup>b,c,d,e</sup> | 2.0 <sup>a,b,c,d</sup> | 2.3 <sup>a</sup>    | 2.1 <sup>a,b,c</sup> | 1.7 <sup>c,d,e</sup> | 0.5 <sup>f</sup>     | 1.4 <sup>e</sup>     |
| Shan-Expo   | 35.7 | 2.9 <sup>c</sup>    | 4.6 <sup>a</sup>    | 1.9 <sup>d</sup>   | 3.9 <sup>b</sup>       | 4.2 <sup>a,b</sup>     | 4.5 <sup>a</sup>    | 4.3 <sup>a,b</sup>   | 4.4 <sup>a</sup>     | 2.0 <sup>d</sup>     | 3.3 <sup>c</sup>     |
| Shannon     | 51.1 | 1.1 <sup>c</sup>    | 1.5 <sup>a</sup>    | 0.6 <sup>d</sup>   | 1.4 <sup>b</sup>       | 1.4 <sup>a,b</sup>     | 1.5 <sup>a</sup>    | 1.5 <sup>a,b</sup>   | 1.5 <sup>a,b</sup>   | 0.7 <sup>d</sup>     | 1.2 <sup>c</sup>     |
| Evenness    | 13.1 | 0.5 <sup>c</sup>    | 0.6 <sup>b</sup>    | 0.3 <sup>d</sup>   | 0.6 <sup>b,c</sup>     | 0.6 <sup>b,c</sup>     | 0.6 <sup>b</sup>    | 0.6 <sup>b</sup>     | 0.7 <sup>b</sup>     | 0.8 <sup>a</sup>     | 0.6 <sup>b</sup>     |
| Simpson     | 15.3 | 2.1 <sup>c</sup>    | 3.3 <sup>a</sup>    | 1.4 <sup>d</sup>   | 2.7 <sup>b</sup>       | 2.7 <sup>b</sup>       | 3.4 <sup>a</sup>    | 3.3 <sup>a</sup>     | 3.5 <sup>a</sup>     | 2.0 <sup>c</sup>     | 2.5 <sup>b,c</sup>   |
| 2012        | F    | FIE                 | FAL                 | GRO                | SRC1 (1)               | SRC2 (2)               | SRC3 (3)            | SRC4 (3)             | HEA                  | FOR                  | MEA                  |
| No. HP      | 23.7 | 8.4 <sup>d,e</sup>  | 9.2 <sup>c,d</sup>  | 6.2 <sup>f</sup>   | 12.8 <sup>a</sup>      | 10.8 <sup>b,c</sup>    | 11.4 <sup>a,b</sup> | 10.8 <sup>b,c</sup>  | 10.8 <sup>b,c</sup>  | 3.8 <sup>g</sup>     | 7.4 <sup>e,f</sup>   |
| Alpha       | 14.1 | 1.6 <sup>b,c</sup>  | 3.1 <sup>a</sup>    | 1.4 <sup>b,c</sup> | 3.2 <sup>a</sup>       | 3.1 <sup>a</sup>       | 2.8 <sup>a</sup>    | 2.8 <sup>a</sup>     | 2.7 <sup>a</sup>     | 1.0 <sup>c</sup>     | 1.9 <sup>b</sup>     |
| Shan-Expo   | 39.4 | 3.5 <sup>c</sup>    | 6.1 <sup>a</sup>    | 1.8 <sup>d</sup>   | 6.5 <sup>a</sup>       | 6.1 <sup>a</sup>       | 6.4 <sup>a</sup>    | 5.8 <sup>a</sup>     | 5.0 <sup>b</sup>     | 2.3 <sup>d</sup>     | 3.7 <sup>c</sup>     |
| Shannon     | 49.1 | 1.2 <sup>c</sup>    | 1.8 <sup>a,b</sup>  | 0.6 <sup>e</sup>   | 1.9 <sup>a</sup>       | 1.8 <sup>a,b</sup>     | 1.9 <sup>a</sup>    | 1.8 <sup>a,b</sup>   | 1.6 <sup>b</sup>     | 0.8 <sup>d</sup>     | 1.3 <sup>c</sup>     |
| Shannon     | 49.1 | 1.2 <sup>c</sup>    | 1.8 <sup>a,b</sup>  | 0.6 <sup>e</sup>   | 1.9 <sup>a</sup>       | 1.8 <sup>a,b</sup>     | 1.9 <sup>a</sup>    | 1.8 <sup>a,b</sup>   | 1.6 <sup>b</sup>     | 0.8 <sup>d</sup>     | 1.3 <sup>c</sup>     |
| Evenness    | 18.5 | 0.6 <sup>d</sup>    | 0.8 <sup>a</sup>    | 0.3 <sup>e</sup>   | 0.7 <sup>a,b,c</sup>   | 0.8 <sup>a,b</sup>     | 0.8 <sup>a,b</sup>  | 0.7 <sup>a,b</sup>   | 0.7 <sup>b,c,d</sup> | 0.6 <sup>d</sup>     | 0.6 <sup>c,d</sup>   |
| Simpson     | 26.8 | 2.7 <sup>b,c</sup>  | 4.9 <sup>a</sup>    | 1.4 <sup>e</sup>   | 4.6 <sup>a</sup>       | 4.6 <sup>a</sup>       | 4.9 <sup>a</sup>    | 4.4 <sup>a</sup>     | 3.3 <sup>b</sup>     | 1.9 <sup>d,e</sup>   | 2.5 <sup>c,d</sup>   |
| 2013        | F    | FIE                 | FAL                 | GRO                | SRC1 (1)               | SRC2 (2)               | SRC3 (3)            | SRC4 (3)             | HEA                  | FOR                  | MEA                  |
| No. HP      | 18.5 | 10.0 <sup>a</sup>   | 6.8 <sup>b</sup>    | 5.0 <sup>c</sup>   | 10.6 <sup>a</sup>      | 10.2 <sup>a</sup>      | 9.4 <sup>a</sup>    | 7.0 <sup>b</sup>     | 10.4 <sup>a</sup>    | 2.8 <sup>d</sup>     | 7.2 <sup>b</sup>     |
| Alpha       | 13.9 | 2.1 <sup>b,c</sup>  | 2.9 <sup>a</sup>    | 1.0 <sup>d</sup>   | 2.4 <sup>a,b</sup>     | 2.3 <sup>a,b,c</sup>   | 2.9 <sup>a</sup>    | 2.0 <sup>b,c</sup>   | 2.5 <sup>a,b</sup>   | 0.5 <sup>d</sup>     | 1.7 <sup>c</sup>     |
| Shan-Expo   | 20.9 | 3.9 <sup>c</sup>    | 5.2 <sup>a,b</sup>  | 1.8 <sup>d</sup>   | 4.6 <sup>b,c</sup>     | 4.3 <sup>b,c</sup>     | 5.8 <sup>a</sup>    | 4.5 <sup>b,c</sup>   | 4.2 <sup>c</sup>     | 2.0 <sup>d</sup>     | 3.8 <sup>c</sup>     |
| Shannon     | 30.5 | 1.3 <sup>c</sup>    | 1.6 <sup>a,b</sup>  | 0.6 <sup>d</sup>   | 1.5 <sup>b,c</sup>     | 1.5 <sup>b,c</sup>     | 1.8 <sup>a</sup>    | 1.5 <sup>b,c</sup>   | 1.4 <sup>b,c</sup>   | 0.7 <sup>d</sup>     | 1.3 <sup>c</sup>     |
| Evenness    | 9.2  | 0.6 <sup>d</sup>    | 0.9 <sup>a</sup>    | 0.4 <sup>e</sup>   | 0.6 <sup>c,d</sup>     | 0.6 <sup>c,d</sup>     | 0.8 <sup>a,b</sup>  | 0.8 <sup>a,b</sup>   | 0.6 <sup>c,d</sup>   | 0.8 <sup>a,b,c</sup> | 0.7 <sup>b,c,d</sup> |
| Simpson     | 16.7 | 2.8 <sup>d</sup>    | 4.4 <sup>a,b</sup>  | 1.4 <sup>f</sup>   | 3.2 <sup>c,d</sup>     | 3.1 <sup>c,d</sup>     | 4.7 <sup>a</sup>    | 3.8 <sup>b,c</sup>   | 2.6 <sup>d,e</sup>   | 1.9 <sup>e,f</sup>   | 3.0 <sup>d</sup>     |
| 2014        | F    | FIE                 | FAL                 | GRO                | SRC1 (1)               | SRC2 (2)               | SRC3 (3)            | SRC4 (3)             | HEA                  | FOR                  | MEA                  |
| No. HP      | 26.2 | 11.4 <sup>a,b</sup> | 10.0 <sup>b,c</sup> | 6.4 <sup>e</sup>   | 10.2 <sup>b,c</sup>    | 12.4 <sup>a</sup>      | 8.6 <sup>c,d</sup>  | 9.0 <sup>c,d</sup>   | 12.8 <sup>a</sup>    | 4.2 <sup>f</sup>     | 8.2 <sup>d</sup>     |
| Alpha       | 26.2 | 1.9 <sup>c</sup>    | 2.3 <sup>b,c</sup>  | 1.2 <sup>d,e</sup> | 2.3 <sup>b,c</sup>     | 2.8 <sup>a,b</sup>     | 1.9 <sup>c</sup>    | 2.8 <sup>a,b</sup>   | 3.0 <sup>a</sup>     | 0.8 <sup>e</sup>     | 1.7 <sup>c,d</sup>   |
| Shan-Expo   | 24.6 | 3.1 <sup>c</sup>    | 4.5 <sup>b</sup>    | 1.6 <sup>e</sup>   | 5.9 <sup>a</sup>       | 5.7 <sup>a</sup>       | 4.0 <sup>b,c</sup>  | 4.2 <sup>b</sup>     | 6.3 <sup>a</sup>     | 2.0 <sup>d</sup>     | 3.5 <sup>b,c</sup>   |
| Shannon     | 30.5 | 1.3 <sup>c</sup>    | 1.6 <sup>a,b</sup>  | 0.6 <sup>d</sup>   | 1.5 <sup>b,c</sup>     | 1.5 <sup>b,c</sup>     | 1.8 <sup>a</sup>    | 1.5 <sup>b,c</sup>   | 1.4 <sup>b,c</sup>   | 0.7 <sup>d</sup>     | 1.3 <sup>c</sup>     |
| Evenness    | 42.8 | 0.5 <sup>e</sup>    | 0.7 <sup>b,c</sup>  | 0.2 <sup>f</sup>   | 0.8 <sup>a</sup>       | 0.7 <sup>a,b,c</sup>   | 0.6 <sup>b,c</sup>  | 0.6 <sup>b,c</sup>   | 0.7 <sup>a,b</sup>   | 0.5 <sup>d,e</sup>   | 0.6 <sup>c,d</sup>   |
| Simpson     | 13.3 | 2.5 <sup>c,d</sup>  | 3.1 <sup>b,c</sup>  | 1.2 <sup>e</sup>   | 4.5 <sup>a</sup>       | 3.5 <sup>b</sup>       | 3.0 <sup>b,c</sup>  | 3.1 <sup>b,c</sup>   | 4.4 <sup>a</sup>     | 1.7 <sup>d,e</sup>   | 2.7 <sup>b,c</sup>   |
| 2011 - 2014 | F    | FIE                 | FAL                 | GRO                | SRC1 (1)               | SRC2 (2)               | SRC3 (3)            | SRC4 (3)             | HEA                  | FOR                  | MEA                  |
| No. HP      | 46.0 | 9.8 <sup>b,c</sup>  | 9.2 <sup>c</sup>    | 6.4 <sup>d</sup>   | 11.1 <sup>a</sup>      | 11.4 <sup>a</sup>      | 10.4 <sup>a,b</sup> | 9.5 <sup>b,c</sup>   | 10.9 <sup>a</sup>    | 3.4 <sup>e</sup>     | 7.3 <sup>d</sup>     |
| Alpha       | 29.5 | 1.8 <sup>b</sup>    | 2.6 <sup>a</sup>    | 1.3 <sup>c</sup>   | 2.4 <sup>a</sup>       | 2.5 <sup>a</sup>       | 2.5 <sup>a</sup>    | 2.4 <sup>a</sup>     | 2.5 <sup>a</sup>     | 0.7 <sup>d</sup>     | 1.7 <sup>b,c</sup>   |
| Shan-Expo   | 45.2 | 3.3 <sup>b</sup>    | 5.1 <sup>a</sup>    | 1.8 <sup>c</sup>   | 5.2 <sup>a</sup>       | 5.1 <sup>a</sup>       | 5.2 <sup>a</sup>    | 4.7 <sup>a</sup>     | 5.0 <sup>a</sup>     | 2.1 <sup>c</sup>     | 3.6 <sup>b</sup>     |
| Shannon     | 85.0 | 1.2 <sup>b</sup>    | 1.6 <sup>a</sup>    | 0.6 <sup>d</sup>   | 1.6 <sup>a</sup>       | 1.6 <sup>a</sup>       | 1.6 <sup>a</sup>    | 1.5 <sup>a</sup>     | 1.6 <sup>a</sup>     | 0.7 <sup>c</sup>     | 1.3 <sup>b</sup>     |
| Evenness    | 27.1 | 0.5 <sup>c</sup>    | 0.7 <sup>a</sup>    | 0.3 <sup>d</sup>   | 0.7 <sup>a,b</sup>     | 0.7 <sup>a,b</sup>     | 0.7 <sup>a,b</sup>  | 0.7 <sup>a,b</sup>   | 0.7 <sup>a,b</sup>   | 0.7 <sup>a,b</sup>   | 0.6 <sup>b</sup>     |
| Simpson     | 28.9 | 2.5 <sup>c</sup>    | 3.9 <sup>a,b</sup>  | 1.4 <sup>e</sup>   | 3.7 <sup>a,b</sup>     | 3.5 <sup>a,b</sup>     | 4.0 <sup>a</sup>    | 3.6 <sup>a,b</sup>   | 3.4 <sup>b</sup>     | 1.9 <sup>d</sup>     | 2.7 <sup>c</sup>     |
