# Supplementary material
Source: MDPI journal article supplement (https://www.mdpi.com/2073-445X/13/2/145)
Supplement: s1 [file s1]

| Differentiated habitat preferences                                      | Symbol | Meaning                                                     |
|-------------------------------------------------------------------------|--------|-------------------------------------------------------------|
| FIE                                                                     | FIE    | Fields                                                      |
| GRL, WME, VYA, PAS, MEA                                                 | GRL    | Wet to moderately dry grassland, cultivated land in general |
| BOG, WHE, FEN, OHA, NHP, OWH,<br>PIO, RSO, REE, SAB, MUD, LOB, BMH, VRB | MIX    | Group of species with various habitat preferences           |
| FAL                                                                     | FAL    | Ruderal grassland, fallows                                  |
| LGL, ODH, DGL, DRY                                                      | DRY    | Open dry habitats                                           |
| MFO, LMF, WFO, AFO, PFO, FOR                                            | FOR    | Forests                                                     |
