# Supplementary material
Source: MDPI journal article supplement (https://www.mdpi.com/2073-445X/13/2/145)
Supplement: s1 [file s1]

| DiffHP | Meaning                                   |
|--------|-------------------------------------------|
| AFO    | Forests on acid soils                     |
| BMH    | Banks and moist habitats in general       |
| BOG    | bogs                                      |
| CGL    | calcareous grassland                      |
| DGL    | Dry sandy grassland including dunes       |
| DRY    | Open dry habitats                         |
| FAL    | Perennial ruderal grassland/fallows       |
| FEN    | Fens and open swamps                      |
| FIE    | Fields on sandy or other soils            |
| FOR    | Forests, in general                       |
| GRL    | grassland                                 |
| LMF    | Low mountain forests                      |
| LOB    | Banks on loam, silt or clay               |
| MFO    | moist deciduous- and spruce forests       |
| MUD    | Mud                                       |
| NHP    | without (recognizable) habitat preference |
| OHA    | open habitats                             |
| OWH    | Open wet habitats                         |
| PAS    | Meadows and moderately dry pastures       |
| PFO    | Preliminary forests                       |
| PIO    | Pioneer habitats, ephemeral fallows       |
| REE    | Reeds                                     |
| RSO    | Raw soils                                 |
| SAB    | Sandy banks                               |
| VRB    | Banks with rich vegetation                |
| VYA    | vineyards                                 |
| WFO    | Wet forests including riparian forests    |
| WHE    | Wet heaths                                |
| WME    | Wet meadows and pastures                  |
