# Supplementary material
Source: MDPI journal article supplement (https://www.mdpi.com/2073-445X/13/2/145)
Supplement: s1 [file s1]

| 2011        | F    | FIE                | FAL                    | GRO                  | SRC1 (1)             | SRC2 (2)             | SRC3 (3)             | SRC4 (3)             | HEA                  | FOR                    | MEA                    |
|-------------|------|--------------------|------------------------|----------------------|----------------------|----------------------|----------------------|----------------------|----------------------|------------------------|------------------------|
| No. HP      | 8.3  | 7.6 <sup>b,c</sup> | 8.2 <sup>a,b</sup>     | 7.4 <sup>b,c</sup>   | 8.8 <sup>a,b</sup>   | 9.4 <sup>a</sup>     | 6.6 <sup>c</sup>     | 8.4 <sup>a,b</sup>   | 6.4 <sup>c</sup>     | 5.0 <sup>d</sup>       | 8.8 <sup>a,b</sup>     |
| Alpha       | 3.0  | 1.3 <sup>c,d</sup> | 1.6 <sup>a,b,c,d</sup> | 2.0 <sup>a</sup>     | 1.8 <sup>a,b</sup>   | 1.8 <sup>a,b,c</sup> | 1.5 <sup>b,c,d</sup> | 1.7 <sup>a,b,c</sup> | 1.2 <sup>d</sup>     | 1.6 <sup>a,b,c,d</sup> | 1.6 <sup>a,b,c,d</sup> |
| Shan-Expo   | 52.7 | 2.0 <sup>h</sup>   | 4.4 <sup>c,d</sup>     | 2.6 <sup>g</sup>     | 5.1 <sup>a,b</sup>   | 5.4 <sup>a</sup>     | 4.8 <sup>b,c</sup>   | 4.1 <sup>d,e</sup>   | 3.7 <sup>e,f</sup>   | 3.3 <sup>f</sup>       | 3.8 <sup>e,f</sup>     |
| Shannon     | 66.3 | 0.7 <sup>h</sup>   | 1.5 <sup>c,d</sup>     | 0.9 <sup>g</sup>     | 1.6 <sup>a,b</sup>   | 1.7 <sup>a</sup>     | 1.6 <sup>b,c</sup>   | 1.4 <sup>d,e</sup>   | 1.3 <sup>e,f</sup>   | 1.2 <sup>f</sup>       | 1.3 <sup>e,f</sup>     |
| Evenness    | 55.8 | 0.3 <sup>f</sup>   | 0.7 <sup>b,c</sup>     | 0.5 <sup>e</sup>     | 0.7 <sup>b</sup>     | 0.8 <sup>b</sup>     | 0.8 <sup>a</sup>     | 0.7 <sup>c</sup>     | 0.7 <sup>b,c</sup>   | 0.8 <sup>b</sup>       | 0.6 <sup>d</sup>       |
| Simpson     | 46.7 | 1.5 <sup>f</sup>   | 3.5 <sup>c</sup>       | 1.8 <sup>f</sup>     | 4.2 <sup>b</sup>     | 4.7 <sup>a</sup>     | 4.1 <sup>b</sup>     | 3.4 <sup>c,d</sup>   | 2.9 <sup>e</sup>     | 2.8 <sup>e</sup>       | 3.0 <sup>d,e</sup>     |
| 2012        | F    | FIE                | FAL                    | GRO                  | SRC1 (1)             | SRC2 (2)             | SRC3 (3)             | SRC4 (3)             | HEA                  | FOR                    | MEA                    |
| No. HP      | 6.5  | 6.0 <sup>c,d</sup> | 9.6 <sup>a</sup>       | 6.0 <sup>c,d</sup>   | 7.4 <sup>b,c</sup>   | 8.4 <sup>a,b</sup>   | 7.0 <sup>b,c</sup>   | 8.2 <sup>a,b</sup>   | 7.6 <sup>b,c</sup>   | 4.8 <sup>d</sup>       | 8.0 <sup>a,b</sup>     |
| Alpha       | 4.8  | 1.0 <sup>d</sup>   | 2.2 <sup>a</sup>       | 1.6 <sup>b,c,d</sup> | 1.5 <sup>b,c,d</sup> | 2.0 <sup>a,b</sup>   | 1.6 <sup>b,c,d</sup> | 1.8 <sup>a,b,c</sup> | 1.3 <sup>c,d</sup>   | 1.2 <sup>c,d</sup>     | 1.3 <sup>c,d</sup>     |
| Shan-Expo   | 23.4 | 2.0 <sup>e</sup>   | 4.8 <sup>b,c</sup>     | 2.1 <sup>e</sup>     | 5.4 <sup>a,b</sup>   | 5.7 <sup>a</sup>     | 5.4 <sup>a,b</sup>   | 4.4 <sup>c</sup>     | 4.2 <sup>c,d</sup>   | 2.3 <sup>e</sup>       | 3.4 <sup>d</sup>       |
| Shannon     | 20.7 | 0.7 <sup>c</sup>   | 1.6 <sup>a</sup>       | 0.7 <sup>c</sup>     | 1.7 <sup>a</sup>     | 1.7 <sup>a</sup>     | 1.7 <sup>a</sup>     | 1.5 <sup>a,b</sup>   | 1.4 <sup>a,b</sup>   | 0.7 <sup>c</sup>       | 1.2 <sup>b</sup>       |
| Evenness    | 19.1 | 0.4 <sup>d</sup>   | 0.7 <sup>c</sup>       | 0.4 <sup>d</sup>     | 0.8 <sup>a</sup>     | 0.8 <sup>a,b</sup>   | 0.9 <sup>a</sup>     | 0.7 <sup>b,c</sup>   | 0.7 <sup>b,c</sup>   | 0.4 <sup>d</sup>       | 0.6 <sup>c</sup>       |
| Simpson     | 31.6 | 1.5 <sup>d</sup>   | 3.8 <sup>b</sup>       | 1.6 <sup>d</sup>     | 4.8 <sup>a</sup>     | 5.1 <sup>a</sup>     | 4.7 <sup>a</sup>     | 3.5 <sup>b</sup>     | 3.5 <sup>b</sup>     | 1.8 <sup>c,d</sup>     | 2.5 <sup>c</sup>       |
| 2013        | F    | FIE                | FAL                    | GRO                  | SRC1 (1)             | SRC2 (2)             | SRC3 (3)             | SRC4 (3)             | HEA                  | FOR                    | MEA                    |
| No. HP      | 3.3  | 6.8 <sup>a</sup>   | 7.2 <sup>a</sup>       | 6.6 <sup>a</sup>     | 7.6 <sup>a</sup>     | 7.0 <sup>a</sup>     | 6.6 <sup>a</sup>     | 6.8 <sup>a</sup>     | 7.6 <sup>a</sup>     | 4.4 <sup>b</sup>       | 7.8 <sup>a</sup>       |
| Alpha       | 1.6  | 1.4 <sup>a,b</sup> | 2.0 <sup>a</sup>       | 1.6 <sup>a,b</sup>   | 1.9 <sup>a</sup>     | 1.9 <sup>a,b</sup>   | 1.5 <sup>a,b</sup>   | 1.6 <sup>a,b</sup>   | 1.5 <sup>a,b</sup>   | 1.3 <sup>b</sup>       | 1.5 <sup>a,b</sup>     |
| Shan-Expo   | 23.5 | 2.6 <sup>c</sup>   | 3.9 <sup>b</sup>       | 2.6 <sup>c</sup>     | 5.1 <sup>a</sup>     | 5.4 <sup>a</sup>     | 4.9 <sup>a</sup>     | 3.7 <sup>b</sup>     | 3.8 <sup>b</sup>     | 2.0 <sup>c</sup>       | 3.6 <sup>b</sup>       |
| Shannon     | 18.4 | 0.9 <sup>d</sup>   | 1.4 <sup>b,c</sup>     | 0.9 <sup>d</sup>     | 1.6 <sup>a</sup>     | 1.7 <sup>a</sup>     | 1.6 <sup>a,b</sup>   | 1.3 <sup>c</sup>     | 1.3 <sup>c</sup>     | 0.6 <sup>e</sup>       | 1.3 <sup>c</sup>       |
| Evenness    | 12.6 | 0.5 <sup>d</sup>   | 0.7 <sup>b,c</sup>     | 0.5 <sup>d</sup>     | 0.8 <sup>a,b</sup>   | 0.9 <sup>a</sup>     | 0.8 <sup>a</sup>     | 0.7 <sup>b,c</sup>   | 0.7 <sup>c</sup>     | 0.4 <sup>d</sup>       | 0.6 <sup>c</sup>       |
| Simpson     | 29.3 | 1.8 <sup>e</sup>   | 3.3 <sup>c</sup>       | 1.8 <sup>e</sup>     | 4.2 <sup>a,b</sup>   | 4.8 <sup>a</sup>     | 4.1 <sup>b</sup>     | 2.6 <sup>d</sup>     | 2.8 <sup>c,d</sup>   | 1.5 <sup>e</sup>       | 2.7 <sup>c,d</sup>     |
| 2014        | F    | FIE                | FAL                    | GRO                  | SRC1 (1)             | SRC2 (2)             | SRC3 (3)             | SRC4 (3)             | HEA                  | FOR                    | MEA                    |
| No. HP      | 3.8  | 7.0 <sup>c</sup>   | 10.8 <sup>a</sup>      | 8.8 <sup>b,c</sup>   | 8.6 <sup>b,c</sup>   | 7.6 <sup>b,c</sup>   | 7.0 <sup>c</sup>     | 6.8 <sup>c</sup>     | 9.2 <sup>a,b</sup>   | 8.0 <sup>b,c</sup>     | 8.6 <sup>b,c</sup>     |
| Alpha       | 3.3  | 1.5 <sup>c</sup>   | 2.5 <sup>a</sup>       | 1.8 <sup>b,c</sup>   | 1.9 <sup>b,c</sup>   | 1.5 <sup>c</sup>     | 1.6 <sup>b,c</sup>   | 2.2 <sup>a,b</sup>   | 1.8 <sup>b,c</sup>   | 1.9 <sup>b,c</sup>     | 1.5 <sup>c</sup>       |
| Shan-Expo   | 35.7 | 2.3 <sup>e</sup>   | 5.6 <sup>a</sup>       | 1.6 <sup>f</sup>     | 3.0 <sup>d</sup>     | 4.9 <sup>b</sup>     | 3.3 <sup>c,d</sup>   | 4.8 <sup>b</sup>     | 3.7 <sup>c</sup>     | 2.3 <sup>e</sup>       | 3.0 <sup>d</sup>       |
| Shannon     | 43.4 | 0.8 <sup>e</sup>   | 1.7 <sup>a</sup>       | 0.5 <sup>f</sup>     | 1.1 <sup>d</sup>     | 1.6 <sup>a,b</sup>   | 1.2 <sup>c,d</sup>   | 1.5 <sup>b</sup>     | 1.3 <sup>c</sup>     | 0.8 <sup>e</sup>       | 1.1 <sup>d</sup>       |
| Evenness    | 50.7 | 0.4 <sup>f</sup>   | 0.7 <sup>b</sup>       | 0.2 <sup>g</sup>     | 0.5 <sup>d,e</sup>   | 0.8 <sup>a,b</sup>   | 0.6 <sup>c</sup>     | 0.8 <sup>a</sup>     | 0.6 <sup>c,d</sup>   | 0.4 <sup>f</sup>       | 0.5 <sup>e</sup>       |
| Simpson     | 38.5 | 1.6 <sup>e</sup>   | 4.7 <sup>a</sup>       | 1.2 <sup>e</sup>     | 2.1 <sup>c,d</sup>   | 4.2 <sup>a,b</sup>   | 2.4 <sup>c</sup>     | 4.0 <sup>b</sup>     | 2.6 <sup>c</sup>     | 1.6 <sup>d,e</sup>     | 2.3 <sup>c</sup>       |
| 2011 - 2014 | F    | FIE                | FAL                    | GRO                  | SRC1 (1)             | SRC2 (2)             | SRC3 (3)             | SRC4 (3)             | HEA                  | FOR                    | MEA                    |
| No. HP      | 8.6  | 6.9 <sup>d</sup>   | 9.0 <sup>a</sup>       | 7.2 <sup>c,d</sup>   | 8.1 <sup>a,b,c</sup> | 8.1 <sup>a,b,c</sup> | 6.8 <sup>d</sup>     | 7.6 <sup>b,c,d</sup> | 7.7 <sup>b,c,d</sup> | 5.6 <sup>e</sup>       | 8.3 <sup>a,b</sup>     |
| Alpha       | 6.7  | 1.3 <sup>d</sup>   | 2.1 <sup>a</sup>       | 1.7 <sup>b,c</sup>   | 1.8 <sup>b</sup>     | 1.8 <sup>b</sup>     | 1.5 <sup>b,c,d</sup> | 1.8 <sup>b</sup>     | 1.4 <sup>d</sup>     | 1.5 <sup>c,d</sup>     | 1.5 <sup>d</sup>       |
| Shan-Expo   | 51.3 | 2.2 <sup>e</sup>   | 4.7 <sup>b</sup>       | 2.2 <sup>e</sup>     | 4.6 <sup>b</sup>     | 5.4 <sup>a</sup>     | 4.6 <sup>b</sup>     | 4.3 <sup>b,c</sup>   | 3.9 <sup>c,d</sup>   | 2.5 <sup>e</sup>       | 3.4 <sup>d</sup>       |
| Shannon     | 53.2 | 0.8 <sup>e</sup>   | 1.5 <sup>b</sup>       | 0.8 <sup>e</sup>     | 1.5 <sup>b</sup>     | 1.7 <sup>a</sup>     | 1.5 <sup>b</sup>     | 1.4 <sup>b,c</sup>   | 1.3 <sup>c,d</sup>   | 0.8 <sup>e</sup>       | 1.2 <sup>d</sup>       |
| Evenness    | 36.9 | 0.4 <sup>f</sup>   | 0.7 <sup>c</sup>       | 0.4 <sup>f</sup>     | 0.7 <sup>b,c</sup>   | 0.8 <sup>a</sup>     | 0.8 <sup>a,b</sup>   | 0.7 <sup>b,c</sup>   | 0.7 <sup>c</sup>     | 0.5 <sup>e</sup>       | 0.6 <sup>d</sup>       |
| Simpson     | 48.0 | 1.6 <sup>d</sup>   | 3.8 <sup>b</sup>       | 1.6 <sup>d</sup>     | 3.8 <sup>b</sup>     | 4.7 <sup>a</sup>     | 3.8 <sup>b</sup>     | 3.4 <sup>b</sup>     | 3.0 <sup>c</sup>     | 1.9 <sup>d</sup>       | 2.6 <sup>c</sup>       |
