# Supplementary material
Source: MDPI journal article supplement (https://www.mdpi.com/2073-445X/13/2/145)
Supplement: s1 [file s1]

| FIE         |        |                      |                      |                      |                      | FAL   |                    |                    |                      |                     |
|-------------|--------|----------------------|----------------------|----------------------|----------------------|-------|--------------------|--------------------|----------------------|---------------------|
|             | F      | 2011                 | 2012                 | 2013                 | 2014                 | F     | 2011               | 2012               | 2013                 | 2014                |
| Shade       | 0.00   | 0.00                 | 0.00                 | 0.00                 | 0.00                 | 1.00  | 0.00 <sup>a</sup>  | 0.00 <sup>a</sup>  | 0.00 <sup>a</sup>    | 0.04 <sup>a</sup>   |
| SE          |        | 0.00                 | 0.00                 | 0.00                 | 0.00                 |       | 0.00               | 0.00               | 0.00                 | 0.03                |
| Herb        | 107.75 | 2.36 <sup>a</sup>    | 0.63 <sup>c</sup>    | 0.13 <sup>d</sup>    | 1.43 <sup>b</sup>    | 1.21  | 40.79 <sup>a</sup> | 39.45 <sup>a</sup> | 35.96 <sup>a</sup>   | 30.91 <sup>a</sup>  |
| SE          |        | 0.02                 | 0.06                 | 0.05                 | 0.13                 |       | 4.46               | 3.99               | 5.19                 | 1.26                |
| Grass       | 93.06  | 0.01 <sup>b</sup>    | 0.00 <sup>b</sup>    | 0.02 <sup>b</sup>    | 3.55 <sup>a</sup>    | 2.06  | 42.97 <sup>a</sup> | 32.82 <sup>a</sup> | 40.50 <sup>a</sup>   | 34.26 <sup>a</sup>  |
| SE          |        | 0.01                 | 0.00                 | 0.02                 | 0.37                 |       | 4.56               | 2.79               | 3.21                 | 2.69                |
| Litter      | 20.29  | 4.70 <sup>a</sup>    | 0.95 <sup>c</sup>    | 3.21 <sup>b</sup>    | 6.14 <sup>a</sup>    | 11.87 | 14.22 <sup>c</sup> | 23.99 <sup>b</sup> | 22.60 <sup>b</sup>   | 32.24 <sup>a</sup>  |
| SE          |        | 0.12                 | 0.07                 | 0.10                 | 0.97                 |       | 1.24               | 2.96               | 2.47                 | 1.39                |
| open ground | 70.55  | 40.38 <sup>b</sup>   | 47.53 <sup>a</sup>   | 34.27 <sup>c</sup>   | 47.42 <sup>a</sup>   | 6.51  | 0.82 <sup>b</sup>  | 0.26 <sup>b</sup>  | 0.12 <sup>b</sup>    | 2.19 <sup>a</sup>   |
| SE          |        | 0.83                 | 0.70                 | 0.65                 | 0.83                 |       | 0.29               | 0.07               | 0.10                 | 0.67                |
| GRO         |        |                      |                      |                      |                      | HEA   |                    |                    |                      |                     |
|             | F      | 2011                 | 2012                 | 2013                 | 2014                 | F     | 2011               | 2012               | 2013                 | 2014                |
| Shade       | 38.10  | 92.95 <sup>a</sup>   | 77.05 <sup>c</sup>   | 77.38 <sup>c</sup>   | 87.12 <sup>b</sup>   |       | 0.00               | 0.00               | 0.00                 | 0.00                |
| SE          |        | 1.49                 | 1.02                 | 0.87                 | 1.53                 |       | 0.00               | 0.00               | 0.00                 | 0.00                |
| Herb        | 0.53   | 9.96 <sup>a</sup>    | 9.73 <sup>a</sup>    | 11.93 <sup>a</sup>   | 12.57 <sup>a</sup>   | 8.33  | 61.95 <sup>a</sup> | 61.66 <sup>a</sup> | 55.29 <sup>a</sup>   | 30.93 <sup>b</sup>  |
| SE          |        | 1.89                 | 2.08                 | 1.97                 | 1.81                 |       | 6.17               | 4.20               | 4.90                 | 4.87                |
| Grass       | 10.38  | 4.72 <sup>a</sup>    | 0.40 <sup>b</sup>    | 0.42 <sup>b</sup>    | 1.73 <sup>b</sup>    | 12.22 | 9.34 <sup>c</sup>  | 21.96 <sup>b</sup> | 29.68 <sup>a,b</sup> | 40.19 <sup>a</sup>  |
| SE          |        | 0.24                 | 0.30                 | 0.40                 | 1.14                 |       | 3.79               | 3.23               | 4.26                 | 3.51                |
| Litter      | 3.40   | 76.34 <sup>a,b</sup> | 78.54 <sup>a,b</sup> | 83.23 <sup>a</sup>   | 69.91 <sup>b</sup>   | 12.28 | 12.70 <sup>b</sup> | 14.52 <sup>b</sup> | 13.37 <sup>b</sup>   | 28.88 <sup>a</sup>  |
| SE          |        | 3.25                 | 3.81                 | 2.23                 | 2.45                 |       | 1.59               | 1.13               | 1.77                 | 3.53                |
| open ground | 3.47   | 1.30 <sup>b</sup>    | 4.83 <sup>a</sup>    | 1.43 <sup>b</sup>    | 0.46 <sup>b</sup>    | 58.99 | 13.74 <sup>a</sup> | 1.76 <sup>b</sup>  | 1.30 <sup>b</sup>    | 0.07 <sup>b</sup>   |
| SE          |        | 0.53                 | 1.82                 | 0.79                 | 0.34                 |       | 1.61               | 0.20               | 0.37                 | 0.03                |
| FOR         |        |                      |                      |                      |                      | MEA   |                    |                    |                      |                     |
|             | F      | 2011                 | 2012                 | 2013                 | 2014                 | F     | 2011               | 2012               | 2013                 | 2014                |
| Shade       | 4.42   | 87.89 <sup>a</sup>   | 64.75 <sup>b</sup>   | 75.64 <sup>a,b</sup> | 74.75 <sup>a,b</sup> | 0.00  | 0.00               | 0.00               | 0.00                 | 0.00                |
| SE          |        | 2.25                 | 6.33                 | 3.73                 | 4.72                 |       | 0.00               | 0.00               | 0.00                 | 0.00                |
| Herb        | 12.21  | 0.00 <sup>b</sup>    | 1.50 <sup>b</sup>    | 5.29 <sup>a</sup>    | 0.26 <sup>b</sup>    | 0.48  | 20.87 <sup>a</sup> | 25.27 <sup>a</sup> | 21.69 <sup>a</sup>   | 22.40 <sup>a</sup>  |
| SE          |        | 0.00                 | 0.62                 | 1.23                 | 0.24                 |       | 1.66               | 1.33               | 1.39                 | 4.92                |
| Grass       | 1.88   | 0.05 <sup>b</sup>    | 0.84 <sup>a</sup>    | 0.45 <sup>a,b</sup>  | 0.44 <sup>a,b</sup>  | 2.49  | 62.11 <sup>a</sup> | 51.94 <sup>a</sup> | 52.11 <sup>a</sup>   | 51.73 <sup>a</sup>  |
| SE          |        | 0.05                 | 0.34                 | 0.19                 | 0.27                 |       | 1.52               | 1.71               | 1.46                 | 5.86                |
| Litter      | 0.83   | 89.00 <sup>a</sup>   | 89.26 <sup>a</sup>   | 92.04 <sup>a</sup>   | 86.53 <sup>a</sup>   | 16.93 | 15.28 <sup>b</sup> | 23.26 <sup>a</sup> | 25.06 <sup>a</sup>   | 25.46 <sup>a</sup>  |
| SE          |        | 3.69                 | 0.49                 | 1.25                 | 2.99                 |       | 0.90               | 0.74               | 1.34                 | 1.48                |
| open ground | 4.22   | 1.31 <sup>a</sup>    | 0.23 <sup>b</sup>    | 0.05 <sup>b</sup>    | 0.00 <sup>b</sup>    | 3.17  | 1.43 <sup>a</sup>  | 0.28 <sup>b</sup>  | 1.30 <sup>a</sup>    | 0.66 <sup>a,b</sup> |
| SE          |        | 0.57                 | 0.18                 | 0.05                 | 0.00                 |       | 0.46               | 0.12               | 0.22                 | 0.30                |
