# Supplementary material
Source: MDPI journal article supplement (https://www.mdpi.com/2073-445X/13/2/145)
Supplement: s1 [file s1]

|       |         | 2011                      | 2012                | 2013              | 2014              |
|-------|---------|---------------------------|---------------------|-------------------|-------------------|
| Plots | F-value | stenotopic forest species |                     |                   |                   |
| SRC1  | 11,72   | 0,00 <sup>c</sup>         | 0,28 <sup>b,c</sup> | 0,46 <sup>b</sup> | 1,12 <sup>a</sup> |
| SRC2  | 51,16   | 0,19 <sup>c</sup>         | 0,49 <sup>b</sup>   | 1,31 <sup>a</sup> | 1,20 <sup>a</sup> |
| SRC3  | 27,47   | 0,50 <sup>b,c</sup>       | 0,38 <sup>c</sup>   | 0,89 <sup>b</sup> | 1,92 <sup>a</sup> |
| SRC4  | 39,16   | 1,49 <sup>a</sup>         | 0,27 <sup>b</sup>   | 0,19 <sup>b</sup> | 0,28 <sup>b</sup> |
| Plots | F-value | eurytopic forest species  |                     |                   |                   |
| SRC1  | 10,85   | 1,89 <sup>a</sup>         | 1,46 <sup>b</sup>   | 1,73 <sup>a</sup> | 1,77 <sup>a</sup> |
| SRC2  | 21,96   | 1,76 <sup>b</sup>         | 1,50 <sup>c</sup>   | 2,00 <sup>a</sup> | 1,39 <sup>c</sup> |
| SRC3  | 14,88   | 2,01 <sup>a</sup>         | 1,45 <sup>b</sup>   | 1,39 <sup>b</sup> | 1,54 <sup>b</sup> |
| SRC4  | 39,03   | 2,17 <sup>a</sup>         | 1,16 <sup>c</sup>   | 1,39 <sup>b</sup> | 1,50 <sup>b</sup> |
