# Supplementary material
Source: MDPI journal article supplement (https://www.mdpi.com/2073-445X/13/2/145)
Supplement: s1 [file s1]

| 2011          | F    | FIE                   | FAL                  | GRO                 | SRC1 (1)             | SRC2 (2)               | SRC3 (3)             | SRC4 (3)              | HEA                  | FOR                  | MEA                 |
|---------------|------|-----------------------|----------------------|---------------------|----------------------|------------------------|----------------------|-----------------------|----------------------|----------------------|---------------------|
| Species a     |      | 43                    | 58                   | 42                  | 51                   | 48                     | 43                   | 52                    | 38                   | 34                   | 41                  |
| Species m     | 9.1  | 25.4 <sup>b,c,d</sup> | 31.2 <sup>a</sup>    | 20.8 <sup>d</sup>   | 30.0 <sup>a,b</sup>  | 31.6 <sup>a</sup>      | 24.4 <sup>c,d</sup>  | 28.2 <sup>a,b,c</sup> | 21.2 <sup>d</sup>    | 15.4 <sup>e</sup>    | 24.0 <sup>c,d</sup> |
| SE            |      | 0.60                  | 2.52                 | 1.36                | 1.48                 | 1.75                   | 2.58                 | 1.46                  | 1.69                 | 0.98                 | 1.79                |
| Individuals a |      | 2169                  | 1423                 | 463                 | 1139                 | 1872                   | 688                  | 1165                  | 1401                 | 188                  | 2268                |
| Individuals m | 42.7 | 433.8 <sup>a,b</sup>  | 284.6 <sup>c</sup>   | 92.6 <sup>d,e</sup> | 227.8 <sup>c</sup>   | 374.4 <sup>b</sup>     | 137.6 <sup>d</sup>   | 233.0 <sup>c</sup>    | 280.2 <sup>c</sup>   | 37.6 <sup>e</sup>    | 453.6 <sup>a</sup>  |
| SE            |      | 24.81                 | 8.64                 | 12.95               | 17.24                | 11.36                  | 14.75                | 13.59                 | 20.60                | 2.54                 | 49.56               |
| 2012          | F    | FIE                   | FAL                  | GRO                 | SRC1 (2)             | SRC2 (3)               | SRC3 (1)             | SRC4 (1)              | HEA                  | FOR                  | MEA                 |
| Species a     |      | 37                    | 55                   | 43                  | 43                   | 48                     | 41                   | 41                    | 37                   | 40                   | 43                  |
| Species m     | 8.2  | 22.2 <sup>c,d</sup>   | 29.2 <sup>a</sup>    | 18.6 <sup>d,e</sup> | 27.4 <sup>a,b</sup>  | 25.6 <sup>a,b,c</sup>  | 22.2 <sup>c,d</sup>  | 22.2 <sup>c,d</sup>   | 21.8 <sup>c,d</sup>  | 16.4 <sup>e</sup>    | 25.0 <sup>b,c</sup> |
| SE            |      | 1.42                  | 1.20                 | 1.99                | 1.75                 | 1.60                   | 0.66                 | 1.39                  | 1.02                 | 0.81                 | 1.05                |
| Individuals a |      | 1681                  | 883                  | 395                 | 965                  | 656                    | 696                  | 934                   | 2219                 | 342                  | 2761                |
| Individuals m | 58.0 | 336.2 <sup>c</sup>    | 176.8 <sup>d</sup>   | 79.0 <sup>e,f</sup> | 193.0 <sup>d</sup>   | 131.2 <sup>d,e,f</sup> | 139.2 <sup>d,e</sup> | 186.8 <sup>d</sup>    | 443.8 <sup>b</sup>   | 68.4 <sup>f</sup>    | 552.2 <sup>a</sup>  |
| SE            |      | 8.49                  | 22.78                | 16.93               | 12.66                | 7.27                   | 8.94                 | 10.07                 | 28.64                | 10.67                | 47.66               |
| 2013          | F    | FIE                   | FAL                  | GRO                 | SRC1 (3)             | SRC2 (4)               | SRC3 (2)             | SRC4 (2)              | HEA                  | FOR                  | MEA                 |
| Species a     |      | 36                    | 36                   | 37                  | 46                   | 42                     | 35                   | 32                    | 39                   | 26                   | 40                  |
| Species m     | 4.9  | 19.6 <sup>a,b</sup>   | 17.6 <sup>b</sup>    | 18.6 <sup>b</sup>   | 23.8 <sup>a</sup>    | 22.4 <sup>a,b</sup>    | 18.8 <sup>a,b</sup>  | 19.6 <sup>a,b</sup>   | 21.8 <sup>a,b</sup>  | 11.4 <sup>c</sup>    | 21.0 <sup>a,b</sup> |
| SE            |      | 0.68                  | 1.29                 | 2.32                | 1.32                 | 1.03                   | 0.20                 | 1.33                  | 1.20                 | 1.17                 | 2.97                |
| Individuals a |      | 966                   | 419                  | 461                 | 547                  | 419                    | 562                  | 558                   | 1290                 | 238                  | 1647                |
| Individuals m | 6.9  | 193.2 <sup>b,c</sup>  | 83.8 <sup>c,d</sup>  | 92.2 <sup>c,d</sup> | 109.4 <sup>c,d</sup> | 83.8 <sup>c,d</sup>    | 112.4 <sup>c,d</sup> | 111.6 <sup>c,d</sup>  | 258.0 <sup>a,b</sup> | 47.6 <sup>d</sup>    | 329.4 <sup>a</sup>  |
| SE            |      | 16.77                 | 11.71                | 11.31               | 8.81                 | 9.26                   | 9.55                 | 8.52                  | 23.29                | 5.54                 | 100.74              |
| 2014          | F    | FIE                   | FAL                  | GRO                 | SRC1 (4)             | SRC2 (1)               | SRC3 (3)             | SRC4 (3)              | HEA                  | FOR                  | MEA                 |
| Species a     |      | 45                    | 70                   | 49                  | 51                   | 47                     | 43                   | 40                    | 54                   | 52                   | 40                  |
| Species m     | 12.4 | 22.8 <sup>c</sup>     | 35.0 <sup>a</sup>    | 24.0 <sup>c</sup>   | 29.8 <sup>b</sup>    | 30.4 <sup>a,b</sup>    | 23.4 <sup>c</sup>    | 17.0 <sup>d</sup>     | 32.2 <sup>a,b</sup>  | 23.0 <sup>c</sup>    | 23.6 <sup>c</sup>   |
| SE            |      | 1.32                  | 2.55                 | 1.45                | 1.77                 | 0.93                   | 1.12                 | 2.15                  | 1.16                 | 1.38                 | 0.87                |
| Individuals a |      | 836                   | 901                  | 1312                | 912                  | 1134                   | 631                  | 252                   | 1614                 | 680                  | 2565                |
| Individuals m | 64.2 | 167.2 <sup>e,f</sup>  | 180.2 <sup>d,e</sup> | 262.40 <sup>c</sup> | 182.4 <sup>d,e</sup> | 226.8 <sup>c,d</sup>   | 126.2 <sup>f</sup>   | 50.4 <sup>g</sup>     | 322.8 <sup>b</sup>   | 136.0 <sup>e,f</sup> | 513.0 <sup>a</sup>  |
| SE            |      | 8.19                  | 20.14                | 20.54               | 15.93                | 16.28                  | 15.31                | 4.86                  | 23.63                | 12.72                | 13.37               |
| 2011 - 2014   | F    | FIE                   | FAL                  | GRO                 | SRC1                 | SRC2                   | SRC3                 | SRC4                  | HEA                  | FOR                  | MEA                 |
| Species a     |      | 62                    | 102                  | 82                  | 90                   | 83                     | 72                   | 78                    | 69                   | 80                   | 67                  |
| Species m     | 12.2 | 40.2 <sup>b</sup>     | 56.6 <sup>a</sup>    | 43.4 <sup>b</sup>   | 55.2 <sup>a</sup>    | 54.6 <sup>a</sup>      | 43.6 <sup>b</sup>    | 44.2 <sup>b</sup>     | 43.8 <sup>b</sup>    | 38.0 <sup>b</sup>    | 38.8 <sup>b</sup>   |
| SE            |      | 0.97                  | 3.97                 | 2.29                | 2.65                 | 1.29                   | 0.87                 | 0.97                  | 0.58                 | 1.23                 | 2.44                |
| Individuals a |      | 5652                  | 3626                 | 2631                | 3563                 | 4081                   | 2577                 | 2909                  | 6524                 | 1448                 | 9241                |
| Individuals m | 64.7 | 1130.4 <sup>c</sup>   | 725.4 <sup>d,e</sup> | 526.2 <sup>f</sup>  | 712.6 <sup>d,e</sup> | 816.2 <sup>d</sup>     | 515.4 <sup>f</sup>   | 581.8 <sup>e,f</sup>  | 1304.8 <sup>b</sup>  | 289.6 <sup>g</sup>   | 1848.2 <sup>a</sup> |
| SE            |      | 28.61                 | 46.64                | 45.48               | 28.26                | 36.05                  | 18.57                | 22.31                 | 13.80                | 24.14                | 155.54              |
