# Supplementary material
Source: MDPI journal article supplement (https://www.mdpi.com/2073-445X/13/2/145)
Supplement: s1 [file s1]

| 1st year of growth |        |        |        |        |        |        |        |        |        |
|--------------------|--------|--------|--------|--------|--------|--------|--------|--------|--------|
| StrVar             | AxeE1  | AxeE2  | AxeE3  | AxeE4  | AxeR1  | AxeR2  | AxeR3  | AxeR4  | VIF    |
| Shade              | 0.944  | -0.118 | -0.148 | -0.172 | 0.927  | -0.113 | -0.130 | -0.109 | 9.155  |
| Litter             | 0.977  | 0.139  | -0.068 | 0.144  | 0.960  | 0.133  | -0.060 | 0.091  | 17.737 |
| Grass              | -0.517 | 0.849  | -0.052 | -0.088 | -0.508 | 0.817  | -0.045 | -0.055 | 12.442 |
| Herb               | -0.516 | 0.176  | -0.645 | -0.037 | -0.507 | 0.169  | -0.564 | -0.023 | 8.071  |
| open ground        | -0.390 | -0.712 | 0.561  | -0.095 | -0.383 | -0.685 | 0.490  | -0.060 | 24.728 |
| 2nd year of growth |        |        |        |        |        |        |        |        |        |
| Shade              | 0.855  | -0.140 | -0.274 | -0.156 | 0.847  | -0.136 | -0.223 | -0.109 | 10.150 |
| Litter             | 0.982  | 0.057  | -0.173 | 0.022  | 0.972  | 0.055  | -0.141 | 0.015  | 13.437 |
| Grass              | -0.489 | 0.863  | -0.045 | -0.043 | -0.485 | 0.837  | -0.037 | -0.030 | 11.562 |
| Herb               | -0.511 | 0.126  | -0.522 | -0.149 | -0.507 | 0.123  | -0.425 | -0.105 | 6.842  |
| open ground        | -0.348 | -0.664 | 0.640  | -0.031 | -0.344 | -0.644 | 0.521  | -0.022 | 19.167 |
| 3rd year of growth |        |        |        |        |        |        |        |        |        |
| Shade              | 0.907  | -0.127 | 0.236  | 0.059  | 0.850  | -0.120 | 0.173  | 0.040  | 4.891  |
| Litter             | 0.983  | 0.165  | -0.032 | -0.072 | 0.922  | 0.155  | -0.024 | -0.049 | 13.394 |
| Grass              | -0.608 | 0.781  | 0.107  | -0.098 | -0.570 | 0.734  | 0.078  | -0.067 | 5.957  |
| Herb               | -0.528 | 0.160  | 0.530  | -0.501 | -0.495 | 0.151  | 0.389  | -0.343 | 4.127  |
| open ground        | -0.361 | -0.742 | -0.422 | 0.133  | -0.338 | -0.697 | -0.310 | 0.091  | 10.540 |
| 4th year of growth |        |        |        |        |        |        |        |        |        |
| Shade              | 0.922  | -0.181 | 0.327  | -0.102 | 0.900  | -0.172 | 0.303  | -0.083 | 7.059  |
| Litter             | 0.975  | 0.177  | 0.001  | 0.129  | 0.952  | 0.168  | 0.001  | 0.105  | 14.733 |
| Grass              | -0.644 | 0.729  | 0.104  | 0.206  | -0.629 | 0.691  | 0.096  | 0.168  | 8.532  |
| Herb               | -0.529 | 0.223  | 0.355  | 0.737  | -0.517 | 0.212  | 0.328  | 0.600  | 4.506  |
| open ground        | -0.328 | -0.697 | -0.228 | -0.548 | -0.321 | -0.661 | -0.211 | -0.446 | 13.468 |
