# Supplementary material
Source: MDPI journal article supplement (https://www.mdpi.com/2073-445X/13/2/145)
Supplement: s1 [file s1]

| Species                            | Author                  | Ind  | ET     | HP  |
|------------------------------------|-------------------------|------|--------|-----|
| <i>Aculepeira ceropegia</i>        | (Walckenaer, 1802)      | 1    | (x)    | FIE |
| <i>Agroeca proxima</i>             | (O. P.-Cambridge, 1871) | 2    | x      | OTH |
| <i>Agyneta affinis</i>             | (Kulczynski, 1898)      | 1    | (h)    | OHA |
| <i>Agyneta decora</i>              | (O. P.-Cambridge, 1871) | 20   | h      | FAL |
| <i>Agyneta rurestris</i>           | (C.L. Koch, 1836)       | 172  | (x)    | FIE |
| <i>Allomengea vidua</i>            | (L. Koch, 1879)         | 1    | h      | WME |
| <i>Alopecosa cuneata</i>           | (Clerck, 1757)          | 912  | (x)    | PAS |
| <i>Alopecosa pulverulenta</i>      | (Clerck, 1757)          | 496  | (x)    | OHA |
| <i>Alopecosa taeniata</i>          | (C.L. Koch, 1835)       | 1    | (h)f   | LMF |
| <i>Amaurobius fenestralis</i>      | (Ström, 1768)           | 4    | (h)f   | MFO |
| <i>Anelasmacephalus cambridgei</i> | (Westwood, 1874)        | 31   | (h)f   | MFO |
| <i>Anguliphantes angulipalpis</i>  | (Westring, 1851)        | 1    | (x)f   | AFO |
| <i>Anyphaena accentuata</i>        | (Walckenaer, 1802)      | 7    | (h)f   | MFO |
| <i>Araeoncus humilis</i>           | (Blackwall, 1841)       | 14   | (x)    | FIE |
| <i>Araneus diadematus</i>          | Clerck, 1757            | 1    | (x)(f) | AFO |
| <i>Araneus quadratus</i>           | Clerck, 1757            | 4    | (h)    | GRL |
| <i>Araneus triguttatus</i>         | (Fabricius, 1793)       | 1    | (h)f   | MFO |
| <i>Aulonia albimana</i>            | (Walckenaer, 1805)      | 9    | x      | ODH |
| <i>Bathyphantes gracilis</i>       | (Blackwall, 1841)       | 247  | (x)    | FIE |
| <i>Bathyphantes parvulus</i>       | (Westring, 1851)        | 52   | eu     | FAL |
| <i>Centromerita bicolor</i>        | (Blackwall, 1833)       | 1070 | (x)(f) | PFO |
| <i>Centromerus brevipalpus</i>     | (Menge, 1866)           | 5    | h(f)   | MFO |
| <i>Centromerus dilutus</i>         | (O. P.-Cambridge, 1875) | 3    | (h)f   | MFO |
| <i>Centromerus incilium</i>        | (L. Koch, 1881)         | 1    | (h)(f) | PFO |
| <i>Centromerus sylvaticus</i>      | (Blackwall, 1841)       | 418  | (h)(f) | PFO |
| <i>Ceratinella brevis</i>          | (Wider, 1834)           | 15   | (h)f   | MFO |
| <i>Cheiracanthium erraticum</i>    | (Walckenaer, 1802)      | 2    | eu     | OHA |
| <i>Cicurina cicur</i>              | (Fabricius, 1793)       | 3    | (h)(f) | PFO |
| <i>Clubiona compta</i>             | C.L. Koch, 1839         | 8    | (x)f   | AFO |
| <i>Clubiona diversa</i>            | O. P.-Cambridge, 1862   | 8    | (h)    | OHA |
| <i>Clubiona pallidula</i>          | (Clerck, 1757)          | 2    | (h)(f) | FOR |
| <i>Clubiona reclusa</i>            | O. P.-Cambridge, 1863   | 115  | (x)    | FAL |
| <i>Clubiona terrestris</i>         | Westring, 1851          | 21   | (x)f   | AFO |
| <i>Cnephalocotes obscurus</i>      | (Blackwall, 1834)       | 35   | (h)    | FAL |
| <i>Coelotes terrestris</i>         | (Wider, 1834)           | 311  | (h)f   | MFO |
| <i>Collinsia inerrans</i>          | (O. P.-Cambridge, 1885) | 129  | (h)    | FIE |
| <i>Cryptachaea riparia</i>         | (Blackwall, 1834)       | 1    | (x)    | FAL |
| <i>Cyclosa conica</i>              | (Pallas, 1772)          | 3    | (x)f   | AFO |
| <i>Diaea dorsata</i>               | (Fabricius, 1777)       | 1    | (h)f   | MFO |
| <i>Dicymbium brevisetosum</i>      | Locket, 1962            | 515  | eu     | FAL |
| <i>Diplocephalus latifrons</i>     | (O. P.-Cambridge, 1863) | 66   | (h)f   | MFO |
| <i>Diplocephalus picinus</i>       | (Blackwall, 1841)       | 677  | (h)f   | MFO |
| <i>Diplostyla concolor</i>         | (Wider, 1834)           | 247  | (h)(f) | PFO |
| <i>Drassodes lapidosus</i>         | (Walckenaer, 1802)      | 2    | eu     | ODH |
| <i>Drassodes pubescens</i>         | (Thorell, 1856)         | 5    | x      | FAL |
| <i>Drassyllus lutetianus</i>       | (L. Koch, 1866)         | 130  | (h)(f) | FAL |
| <i>Drassyllus pusillus</i>         | (C.L. Koch, 1833)       | 166  | (x)(f) | OHA |
| <i>Enoplognatha ovata</i>          | (Clerck, 1757)          | 14   | (x)(f) | PFO |
| <i>Enoplognatha thoracica</i>      | (Hahn, 1833)            | 45   | (x)    | PAS |
| <i>Episinus angulatus</i>          | (Blackwall, 1836)       | 1    | (h)(f) | FOR |
| <i>Eratigena picta</i>             | (Simon, 1870)           | 6    | (x)(f) | MFO |
| <i>Erigone atra</i>                | Blackwall, 1833         | 2108 | (h)    | FIE |
| <i>Erigone dentipalpis</i>         | (Wider, 1834)           | 1412 | (x)    | FIE |

|                                 |                         |      |        |     |
|---------------------------------|-------------------------|------|--------|-----|
| <i>Erigonella hiemalis</i>      | (Blackwall, 1841)       | 128  | (h)    | FAL |
| <i>Ero furcata</i>              | (Villers, 1789)         | 3    | (x)(f) | AFO |
| <i>Evarcha arcuata</i>          | (Clerck, 1757)          | 2    | eu     | OHA |
| <i>Evarcha falcata</i>          | (Clerck, 1757)          | 1    | (x)(f) | AFO |
| <i>Floronia bucculenta</i>      | (Clerck, 1757)          | 4    | (h)f   | MFO |
| <i>Gongyliellum latebricola</i> | (O. P.-Cambridge, 1871) | 3    | (h)f   | FOR |
| <i>Gongyliellum vivum</i>       | (O. P.-Cambridge, 1875) | 1    | h      | BOG |
| <i>Hahnia helveola</i>          | Simon, 1875             | 4    | (h)f   | MFO |
| <i>Hahnia nava</i>              | (Blackwall, 1841)       | 3    | (x)(f) | NHP |
| <i>Haplodrassus signifer</i>    | (C.L. Koch, 1839)       | 38   | x      | OTH |
| <i>Haplodrassus silvestris</i>  | (Blackwall, 1833)       | 14   | (x)f   | AFO |
| <i>Histoipona torpida</i>       | (C.L. Koch, 1837)       | 33   | (h)f   | LMF |
| <i>Inermocoelotes inermis</i>   | (L. Koch, 1855)         | 80   | (h)f   | LMF |
| <i>Labulla thoracica</i>        | (Wider, 1834)           | 1    | (h)f   | LMF |
| <i>Lacinius dentiger</i>        | (C.L. Koch, 1847)       | 134  | (h)f   | MFO |
| <i>Lacinius ephippiatus</i>     | (C.L. Koch, 1835)       | 1833 | (h)f   | MFO |
| <i>Larinioides cornutus</i>     | (Clerck, 1757)          | 2    | h      | REE |
| <i>Leiobunum blackwalli</i>     | Meade, 1861             | 3    | (h)(f) | MFO |
| <i>Leiobunum rotundum</i>       | (Latreille, 1798)       | 1    | f      | AFO |
| <i>Lepthyphantes minutus</i>    | (Blackwall, 1833)       | 4    | (x)f   | AFO |
| <i>Linyphia hortensis</i>       | Sundevall, 1830         | 8    | (h)f   | MFO |
| <i>Linyphia triangularis</i>    | (Clerck, 1757)          | 2    | (x)(f) | NHP |
| <i>Lophopilio palpalis</i>      | (Herbst, 1799)          | 133  | (h)f   | MFO |
| <i>Mangora acalypha</i>         | (Walckenaer, 1802)      | 4    | eu     | NHP |
| <i>Maso sundevalli</i>          | (Westring, 1851)        | 6    | (h)f   | MFO |
| <i>Mermessus trilobatus</i>     | (Emerton, 1882)         | 56   | eu     | NHP |
| <i>Metellina segmentata</i>     | (Clerck, 1757)          | 4    | (f)    | MFO |
| <i>Micaria pulicaria</i>        | (Sundevall, 1831)       | 12   | eu     | OHA |
| <i>Micrargus herbigradus</i>    | (Blackwall, 1854)       | 10   | (x)f   | FOR |
| <i>Microlinyphia pusilla</i>    | (Sundevall, 1830)       | 4    | (h)    | OHA |
| <i>Microneta viaria</i>         | (Blackwall, 1841)       | 210  | (h)f   | MFO |
| <i>Mioxena blanda</i>           | (Simon, 1884)           | 4    | x      | OHA |
| <i>Mitostoma chrysomelas</i>    | (Hermann, 1804)         | 4    | (h)(f) | FAL |
| <i>Monocephalus fuscipes</i>    | (Blackwall, 1836)       | 6    | (h)f   | LMF |
| <i>Nemastoma lugubre</i>        | (O.F. Müller, 1776)     | 362  | (h)f   | MFO |
| <i>Meom reticulatus</i>         | (Blackwall, 1853)       | 1    | (h)f   | MFO |
| <i>Neottiura bimaculata</i>     | (Linnaeus, 1767)        | 7    | (h)    | OHA |
| <i>Neriere clathrata</i>        | (Sundevall, 1830)       | 10   | (h)(f) | PFO |
| <i>Oedothorax apicatus</i>      | (Blackwall, 1850)       | 5532 | (x)    | FIE |
| <i>Oedothorax fuscus</i>        | (Blackwall, 1834)       | 22   | (h)    | WME |
| <i>Oedothorax gibbosus</i>      | (Blackwall, 1841)       | 5    | h      | BOG |
| <i>Oedothorax retusus</i>       | (Westring, 1851)        | 23   | h      | PAS |
| <i>Oligolophus tridens</i>      | (C.L. Koch, 1836)       | 3195 | (h)(f) | MFO |
| <i>Opilio canestrinii</i>       | (Thorell, 1876)         | 6    | (h)f   | MFO |
| <i>Ostearius melanopygius</i>   | (O. P.-Cambridge, 1879) | 2    | (x)    | PIO |
| <i>Ozyptila praticola</i>       | (C.L. Koch, 1837)       | 28   | (x)f   | MFO |
| <i>Pachygnatha clercki</i>      | Sundevall, 1823         | 478  | h      | OHA |
| <i>Pachygnatha degeeri</i>      | Sundevall, 1830         | 1701 | eu     | OHA |
| <i>Pachygnatha listeri</i>      | Sundevall, 1830         | 2    | (h)f   | MFO |
| <i>Palliduphantes pallidus</i>  | (O. P.-Cambridge, 1871) | 21   | (h)f   | MFO |
| <i>Pardosa agrestis</i>         | (Westring, 1861)        | 49   | (x)    | FIE |
| <i>Pardosa amentata</i>         | (Clerck, 1757)          | 4380 | h (f)  | PFO |
| <i>Pardosa lugubris</i>         | (Walckenaer, 1802)      | 266  | (h)(f) | PFO |
| <i>Pardosa nigriceps</i>        | (Thorell, 1856)         | 2    | x      | DGL |

|                                 |                           |      |        |     |
|---------------------------------|---------------------------|------|--------|-----|
| <i>Pardosa palustris</i>        | (Linnaeus, 1758)          | 6203 | eu     | GRL |
| <i>Pardosa pullata</i>          | (Clerck, 1757)            | 2359 | (h)    | OHA |
| <i>Pardosa saltans</i>          | Töpfer-Hofmann, 2000      | 127  | (h)(f) | PFO |
| <i>Paroligolophus agrestis</i>  | (Meade, 1855)             | 5    | (h)(f) | PFO |
| <i>Pelecopsis parallela</i>     | (Wider, 1834)             | 1    | (h)    | OHA |
| <i>Phalangium opilio</i>        | Linnaeus, 1758            | 87   | (x)    | FIE |
| <i>Philodromus aureolus</i>     | (Clerck, 1757)            | 1    | (x)f   | AFO |
| <i>Philodromus cespitum</i>     | (Walckenaer, 1802)        | 1    | (x)f   | AFO |
| <i>Pholcomma gibbum</i>         | (Westring, 1851)          | 1    | (x)(f) | AFO |
| <i>Phrurolithus festivus</i>    | (C.L. Koch, 1835)         | 1    | (x)    | DRY |
| <i>Phrurolithus minimus</i>     | C.L. Koch, 1839           | 3    | x      | DGL |
| <i>Phylloneta impressa</i>      | (L. Koch, 1881)           | 1    | (x)    | FAL |
| <i>Piratula hygrophila</i>      | (Thorell, 1872)           | 1    | h(f)   | WFO |
| <i>Piratula latitans</i>        | (Blackwall, 1841)         | 13   | h      | OWH |
| <i>Piratula uliginosa</i>       | (Thorell, 1856)           | 274  | h      | FAL |
| <i>Pisaura mirabilis</i>        | (Clerck, 1757)            | 12   | (h)    | OHA |
| <i>Platybunus bucephalus</i>    | (C.L. Koch, 1835)         | 35   | (h)f   | LMF |
| <i>Pocadicnemis juncea</i>      | Locket & Millidge, 1953   | 3    | h      | OHA |
| <i>Pocadicnemis pumila</i>      | (Blackwall, 1841)         | 7    | (h)(f) | FOR |
| <i>Porrhomma errans</i>         | (Blackwall, 1841)         | 70   | (h)(f) | PFO |
| <i>Porrhomma microphthalmum</i> | (O. P.-Cambridge, 1871)   | 35   | (x)    | FIE |
| <i>Porrhomma oblitum</i>        | (O. P.-Cambridge, 1871)   | 8    | h      | VRB |
| <i>Porrhomma pygmaeum</i>       | (Blackwall, 1834)         | 1    | h(f)   | WFO |
| <i>Pseudophrys erratica</i>     | (Walckenaer, 1826)        | 1    | (x)f   | AFO |
| <i>Rilaena triangularis</i>     | (Herbst, 1799)            | 800  | (h)(f) | GRL |
| <i>Robertus arundineti</i>      | (O. P.-Cambridge, 1871)   | 6    | eu     | OHA |
| <i>Robertus lividus</i>         | (Blackwall, 1836)         | 20   | (x)f   | MFO |
| <i>Robertus neglectus</i>       | (O. P.-Cambridge, 1871)   | 51   | (h)f   | MFO |
| <i>Segestria senoculata</i>     | (Linnaeus, 1758)          | 3    | (x)f   | AFO |
| <i>Stemonyphantes lineatus</i>  | (Linnaeus, 1758)          | 6    | (x)f   | PFO |
| <i>Styloctetor compar</i>       | (Westring, 1861)          | 1    | h      | WME |
| <i>Talavera aequipes</i>        | (O. P.-Cambridge, 1871)   | 1    | x      | DGL |
| <i>Tallusia experta</i>         | (O. P.-Cambridge, 1871)   | 31   | h(f)   | FAL |
| <i>Tapinocyba insecta</i>       | (L. Koch, 1869)           | 50   | (h)f   | MFO |
| <i>Tapinocyba praecox</i>       | (O. P.-Cambridge, 1873)   | 2    | x      | FAL |
| <i>Tapinopa longidens</i>       | (Wider, 1834)             | 1    | (x)f   | AFO |
| <i>Tenuiphantes cristatus</i>   | (Menge, 1866)             | 1    | (h)f   | MFO |
| <i>Tenuiphantes flavipes</i>    | (Blackwall, 1854)         | 371  | (h)f   | MFO |
| <i>Tenuiphantes mengei</i>      | (Kulczynski, 1887)        | 9    | h(f)   | FOR |
| <i>Tenuiphantes tenebricola</i> | (Wider, 1834)             | 61   | (h)f   | MFO |
| <i>Tenuiphantes tenuis</i>      | (Blackwall, 1852)         | 256  | (x)    | GRL |
| <i>Tenuiphantes zimmermanni</i> | (Bertkau, 1890)           | 108  | (h)f   | MFO |
| <i>Tetragnatha montana</i>      | Simon, 1874               | 1    | h(f)   | WFO |
| <i>Tetragnatha nigrita</i>      | Lendl, 1886               | 1    | h(f)   | VRB |
| <i>Tetragnatha obtusa</i>       | C.L. Koch, 1837           | 1    | (x)f   | AFO |
| <i>Tetragnatha pinicola</i>     | L. Koch, 1870             | 3    | (x)    | FIE |
| <i>Theridion varians</i>        | Hahn, 1833                | 1    | (x)    | ODH |
| <i>Thyreosthenius biovatus</i>  | (O. P.-Cambridge, 1875)   | 1    | x      | DGL |
| <i>Tiso vagans</i>              | (Blackwall, 1834)         | 94   | (h)    | PAS |
| <i>Trochosa ruricola</i>        | (De Geer, 1778)           | 1324 | eu     | GRL |
| <i>Trochosa spinipalpis</i>     | (F.O. P.-Cambridge, 1895) | 1    | h      | WME |
| <i>Trochosa terricola</i>       | Thorell, 1856             | 782  | (h)    | FAL |
| <i>Troxochrus scabriculus</i>   | (Westring, 1851)          | 3    | x      | DGL |
| <i>Walckenaeria acuminata</i>   | Blackwall, 1833           | 1    | (h)f   | MFO |

|                                  |                         |     |        |     |
|----------------------------------|-------------------------|-----|--------|-----|
| <i>Walckenaeria alticeps</i>     | (Denis, 1952)           | 4   | hf     | WFO |
| <i>Walckenaeria antica</i>       | (Wider, 1834)           | 1   | (x)(f) | PFO |
| <i>Walckenaeria atrotibialis</i> | (O. P.-Cambridge, 1878) | 52  | (h)f   | MFO |
| <i>Walckenaeria corniculans</i>  | (O. P.-Cambridge, 1875) | 5   | (h)f   | MFO |
| <i>Walckenaeria cucullata</i>    | (C.L. Koch, 1836)       | 3   | (h)f   | MFO |
| <i>Walckenaeria cuspidata</i>    | Blackwall, 1833         | 2   | hf     | WFO |
| <i>Walckenaeria dysderoides</i>  | (Wider, 1834)           | 31  | (x)f   | MFO |
| <i>Walckenaeria nudipalpis</i>   | (Westring, 1851)        | 56  | h(f)   | OWH |
| <i>Walckenaeria obtusa</i>       | Blackwall, 1836         | 15  | (h)f   | MFO |
| <i>Walckenaeria unicornis</i>    | O. P.-Cambridge, 1861   | 4   | h(f)   | OWH |
| <i>Walckenaeria vigilax</i>      | (Blackwall, 1853)       | 98  | h      | FIE |
| <i>Xysticus bifasciatus</i>      | C.L. Koch, 1837         | 9   | x      | FAL |
| <i>Xysticus cristatus</i>        | (Clerck, 1757)          | 138 | (x)    | GRL |
| <i>Xysticus kochi</i>            | Thorell, 1872           | 138 | (x)    | OHA |
| <i>Xysticus lanio</i>            | C.L. Koch, 1835         | 7   | (h)f   | MFO |
| <i>Xysticus ulmi</i>             | (Hahn, 1831)            | 44  | (h)    | OHA |
| <i>Zelotes clivicola</i>         | (L. Koch, 1870)         | 3   | (x)f   | AFO |
| <i>Zelotes latreillei</i>        | (Simon, 1878)           | 14  | (x)    | ODH |
| <i>Zelotes subterraneus</i>      | (C.L. Koch, 1833)       | 6   | (x)(f) | MFO |
| <i>Zora spinimana</i>            | (Sundevall, 1833)       | 12  | eu     | NHP |

---
