# Supplementary material
Source: MDPI journal article supplement (https://www.mdpi.com/2073-445X/13/2/145)
Supplement: s1 [file s1]

| Ground beetles |      |                     |                     |                     |                     |
|----------------|------|---------------------|---------------------|---------------------|---------------------|
| SRC1           |      |                     |                     |                     |                     |
| HP             | F    | 2011                | 2012                | 2013                | 2014                |
| FIE            | 3.3  | 19.7 <sup>a</sup>   | 16.1 <sup>a,b</sup> | 17.7 <sup>a,b</sup> | 14.6 <sup>b</sup>   |
| GRL            | 9.1  | 12.5 <sup>a</sup>   | 12.7 <sup>a</sup>   | 8.5 <sup>b</sup>    | 7.6 <sup>b</sup>    |
| DRY            | 5.2  | 6.2 <sup>b</sup>    | 9.3 <sup>a</sup>    | 6.5 <sup>a,b</sup>  | 4.0 <sup>b</sup>    |
| FOR            | 13.0 | 8.7 <sup>b</sup>    | 9.9 <sup>b</sup>    | 13.6 <sup>a</sup>   | 15.7 <sup>a</sup>   |
| MIX            | 61.1 | 3.2 <sup>c</sup>    | 6.6 <sup>b</sup>    | 6.0 <sup>b</sup>    | 10.9 <sup>a</sup>   |
| SRC2           |      |                     |                     |                     |                     |
| HP             | F    | 2011                | 2012                | 2013                | 2014                |
| FIE            | 16.1 | 19.6 <sup>a</sup>   | 14.6 <sup>b</sup>   | 12.8 <sup>b</sup>   | 18.4 <sup>a</sup>   |
| GRL            | 7.1  | 9.1 <sup>a</sup>    | 9.5 <sup>a</sup>    | 5.8 <sup>b</sup>    | 9.4 <sup>a</sup>    |
| DRY            | 32.8 | 11.9 <sup>a</sup>   | 8.4 <sup>b</sup>    | 3.5 <sup>c</sup>    | 4.8 <sup>c</sup>    |
| FOR            | 53.2 | 6.7 <sup>d</sup>    | 14.6 <sup>b</sup>   | 20.0 <sup>a</sup>   | 10.4 <sup>c</sup>   |
| MIX            | 13.9 | 3.7 <sup>c</sup>    | 8.7 <sup>a,b</sup>  | 7.2 <sup>b</sup>    | 10.1 <sup>a</sup>   |
| SRC3           |      |                     |                     |                     |                     |
| HP             | F    | 2011                | 2012                | 2013                | 2014                |
| FIE            | 9.7  | 16.9 <sup>a</sup>   | 15.0 <sup>a</sup>   | 11.4 <sup>b</sup>   | 8.8 <sup>b</sup>    |
| GRL            | 26.4 | 11.8 <sup>a,b</sup> | 13.4 <sup>a</sup>   | 9.0 <sup>b</sup>    | 2.6 <sup>b</sup>    |
| DRY            | 10.2 | 5.4 <sup>a,b</sup>  | 7.5 <sup>a</sup>    | 4.1 <sup>b</sup>    | 1.5 <sup>c</sup>    |
| FOR            | 7.7  | 13.4 <sup>b,c</sup> | 11.0 <sup>c</sup>   | 16.7 <sup>b</sup>   | 22.2 <sup>a</sup>   |
| MIX            | 19.7 | 4.7 <sup>c</sup>    | 8.7 <sup>b</sup>    | 10.9 <sup>a</sup>   | 9.0 <sup>b</sup>    |
| SRC4           |      |                     |                     |                     |                     |
| HP             | F    | 2011                | 2012                | 2013                | 2014                |
| FIE            | 2.6  | 15.5 <sup>a</sup>   | 15.5 <sup>a</sup>   | 12.6 <sup>b</sup>   | 14.9 <sup>a,b</sup> |
| GRL            | 16.3 | 9.6 <sup>b</sup>    | 16.1 <sup>a</sup>   | 14.1 <sup>a</sup>   | 7.2 <sup>b</sup>    |
| DRY            | 3.3  | 3.5 <sup>a,b</sup>  | 5.7 <sup>a</sup>    | 2.9 <sup>b</sup>    | 2.3 <sup>b</sup>    |
| FOR            | 11.8 | 17.7 <sup>a</sup>   | 8.6 <sup>b</sup>    | 16.1 <sup>a</sup>   | 17.6 <sup>a</sup>   |
| MIX            | 7.4  | 2.7 <sup>b</sup>    | 7.3 <sup>a</sup>    | 4.6 <sup>b</sup>    | 7.6 <sup>a</sup>    |

| Arachnids |       |                     |                     |                     |                     |
|-----------|-------|---------------------|---------------------|---------------------|---------------------|
| SRC1      |       |                     |                     |                     |                     |
| HP        | F     | 2011                | 2012                | 2013                | 2014                |
| FIE       | 16.9  | 13.6 <sup>a</sup>   | 12.4 <sup>a,b</sup> | 9.0 <sup>b</sup>    | 3.0 <sup>c</sup>    |
| GRL       | 19.3  | 12.4 <sup>a</sup>   | 10.2 <sup>b</sup>   | 6.2 <sup>c</sup>    | 5.9 <sup>c</sup>    |
| RUD       | 9.2   | 4.6 <sup>b</sup>    | 5.7 <sup>b</sup>    | 11.8 <sup>a</sup>   | 9.6 <sup>a</sup>    |
| FOR       | 14.8  | 15.0 <sup>c</sup>   | 17.1 <sup>b,c</sup> | 18.8 <sup>b</sup>   | 23.0 <sup>a</sup>   |
| MIX       | 17.7  | 8.1 <sup>a</sup>    | 8.6 <sup>a</sup>    | 5.9 <sup>b</sup>    | 3.3 <sup>c</sup>    |
| SRC2      |       |                     |                     |                     |                     |
| HP        | F     | 2011                | 2012                | 2013                | 2014                |
| FIE       | 2.2   | 10.1 <sup>b</sup>   | 10.8 <sup>a,b</sup> | 11.2 <sup>a,b</sup> | 13.8 <sup>a</sup>   |
| GRL       | 12.4  | 11.5 <sup>a</sup>   | 8.2 <sup>b</sup>    | 7.1 <sup>b</sup>    | 13.0 <sup>a</sup>   |
| RUD       | 25.8  | 5.1 <sup>b</sup>    | 5.9 <sup>b</sup>    | 11.8 <sup>a</sup>   | 5.0 <sup>b</sup>    |
| FOR       | 2.0   | 14.9 <sup>b</sup>   | 15.7 <sup>a,b</sup> | 17.2 <sup>a</sup>   | 15.4 <sup>a,b</sup> |
| MIX       | 157.8 | 13.5 <sup>a</sup>   | 14.0 <sup>a</sup>   | 6.7 <sup>b</sup>    | 5.6 <sup>c</sup>    |
| SRC3      |       |                     |                     |                     |                     |
| HP        | F     | 2011                | 2012                | 2013                | 2014                |
| FIE       | 7.7   | 6.8 <sup>b,c</sup>  | 12.8 <sup>a</sup>   | 8.3 <sup>b</sup>    | 3.7 <sup>c</sup>    |
| GRL       | 38.9  | 12.0 <sup>a</sup>   | 10.0 <sup>b</sup>   | 5.2 <sup>c</sup>    | 4.4 <sup>c</sup>    |
| RUD       | 8.7   | 5.7 <sup>b</sup>    | 6.5 <sup>b</sup>    | 9.3 <sup>a</sup>    | 9.2 <sup>a</sup>    |
| FOR       | 5.4   | 19.5 <sup>a,b</sup> | 16.4 <sup>b</sup>   | 20.3 <sup>a</sup>   | 23.1 <sup>a</sup>   |
| MIX       | 5.5   | 6.9 <sup>a</sup>    | 8.9 <sup>a</sup>    | 8.0 <sup>a</sup>    | 4.0 <sup>b</sup>    |
| SRC4      |       |                     |                     |                     |                     |
| HP        | F     | 2011                | 2012                | 2013                | 2014                |
| FIE       | 37.2  | 2.8 <sup>c</sup>    | 16.4 <sup>a</sup>   | 8.3 <sup>b</sup>    | 7.3 <sup>b</sup>    |
| GRL       | 5.7   | 11.5 <sup>a</sup>   | 10.0 <sup>a</sup>   | 5.5 <sup>b</sup>    | 9.0 <sup>a</sup>    |
| RUD       | 10.9  | 4.3 <sup>c</sup>    | 3.7 <sup>c</sup>    | 6.4 <sup>b</sup>    | 8.6 <sup>a</sup>    |
| FOR       | 8.4   | 22.0 <sup>a</sup>   | 15.1 <sup>b</sup>   | 21.4 <sup>a</sup>   | 19.9 <sup>a</sup>   |
| MIX       | 1.9   | 6.1 <sup>a</sup>    | 7.1 <sup>a</sup>    | 8.1 <sup>a</sup>    | 3.4 <sup>a</sup>    |
