# Supplementary material
Source: MDPI journal article supplement (https://www.mdpi.com/2073-445X/13/2/145)
Supplement: s1 [file s1]

| SRC1     |     |      |           |          |     |      |           |          |     |      |           |          |     |      |           |      |
|----------|-----|------|-----------|----------|-----|------|-----------|----------|-----|------|-----------|----------|-----|------|-----------|------|
| 2011 (1) |     |      |           | 2012 (2) |     |      |           | 2013 (3) |     |      |           | 2014 (4) |     |      |           |      |
| HP       | Ind | Dom  | $\bar{x}$ | SE       | Ind | Dom  | $\bar{x}$ | SE       | Ind | Dom  | $\bar{x}$ | SE       | Ind | Dom  | $\bar{x}$ | SE   |
| FIE      | 329 | 28,9 | 65,8      | 12,0     | 235 | 24,4 | 47,0      | 11,5     | 70  | 12,8 | 14,0      | 2,8      | 14  | 1,5  | 2,8       | 0,8  |
| GRL      | 265 | 23,3 | 53,0      | 4,8      | 152 | 15,8 | 30,4      | 3,4      | 36  | 6,6  | 7,2       | 2,7      | 50  | 5,5  | 10,0      | 1,6  |
| RUD      | 37  | 3,2  | 7,4       | 0,7      | 49  | 5,1  | 9,8       | 1,7      | 128 | 23,4 | 25,6      | 9,7      | 128 | 14,0 | 25,6      | 2,7  |
| FOR      | 391 | 34,3 | 78,2      | 11,2     | 421 | 43,6 | 84,2      | 7,3      | 284 | 51,9 | 56,8      | 1,9      | 703 | 77,1 | 140,6     | 12,6 |
| MIX      | 117 | 10,3 | 23,4      | 4,6      | 108 | 11,2 | 21,6      | 1,9      | 29  | 5,3  | 5,8       | 0,9      | 17  | 1,9  | 3,4       | 1,0  |

  

| SRC2     |     |      |           |          |     |      |           |          |     |      |           |          |     |      |           |      |
|----------|-----|------|-----------|----------|-----|------|-----------|----------|-----|------|-----------|----------|-----|------|-----------|------|
| 2011 (2) |     |      |           | 2012 (3) |     |      |           | 2013 (4) |     |      |           | 2014 (1) |     |      |           |      |
| HP       | Ind | Dom  | $\bar{x}$ | SE       | Ind | Dom  | $\bar{x}$ | SE       | Ind | Dom  | $\bar{x}$ | SE       | Ind | Dom  | $\bar{x}$ | SE   |
| FIE      | 290 | 15,5 | 58,0      | 2,3      | 119 | 18,1 | 23,8      | 4,0      | 85  | 20,3 | 17,0      | 5,0      | 330 | 29,1 | 66,0      | 10,1 |
| GRL      | 373 | 19,9 | 74,6      | 4,9      | 68  | 10,4 | 13,6      | 2,0      | 32  | 7,6  | 6,4       | 0,7      | 300 | 26,5 | 60,0      | 11,8 |
| RUD      | 76  | 4,1  | 15,2      | 2,5      | 37  | 5,6  | 7,4       | 1,9      | 88  | 21,0 | 17,6      | 1,7      | 46  | 4,1  | 9,2       | 2,3  |
| FOR      | 623 | 33,3 | 124,6     | 10,1     | 240 | 36,6 | 48,0      | 2,6      | 185 | 44,2 | 37,0      | 3,1      | 404 | 35,6 | 80,8      | 9,7  |
| MIX      | 510 | 27,2 | 102,0     | 4,5      | 192 | 29,3 | 38,4      | 1,9      | 29  | 6,9  | 5,8       | 0,7      | 54  | 4,8  | 10,8      | 0,9  |

  

| SRC3     |     |      |           |          |     |      |           |          |     |      |           |          |     |      |           |      |
|----------|-----|------|-----------|----------|-----|------|-----------|----------|-----|------|-----------|----------|-----|------|-----------|------|
| 2011 (3) |     |      |           | 2012 (1) |     |      |           | 2013 (2) |     |      |           | 2014 (3) |     |      |           |      |
| HP       | Ind | Dom  | $\bar{x}$ | SE       | Ind | Dom  | $\bar{x}$ | SE       | Ind | Dom  | $\bar{x}$ | SE       | Ind | Dom  | $\bar{x}$ | SE   |
| FIE      | 59  | 8,6  | 11,8      | 5,5      | 182 | 26,1 | 36,4      | 8,7      | 63  | 11,2 | 12,6      | 3,1      | 14  | 2,2  | 2,8       | 0,5  |
| GRL      | 153 | 22,2 | 30,6      | 4,5      | 105 | 15,1 | 21,0      | 1,9      | 24  | 4,3  | 4,8       | 0,9      | 19  | 3,0  | 3,8       | 0,4  |
| RUD      | 35  | 5,1  | 7,0       | 0,9      | 46  | 6,6  | 9,2       | 1,9      | 75  | 13,3 | 15,0      | 1,6      | 84  | 13,3 | 16,8      | 3,0  |
| FOR      | 387 | 56,3 | 77,4      | 6,9      | 278 | 39,9 | 55,6      | 1,6      | 342 | 60,9 | 68,4      | 7,6      | 495 | 78,4 | 99,0      | 13,1 |
| MIX      | 54  | 7,8  | 10,8      | 2,7      | 85  | 12,2 | 17,0      | 2,0      | 58  | 10,3 | 11,6      | 2,6      | 19  | 3,0  | 3,8       | 1,0  |

  

| SRC4     |     |      |           |          |     |      |           |          |     |      |           |          |     |      |           |     |
|----------|-----|------|-----------|----------|-----|------|-----------|----------|-----|------|-----------|----------|-----|------|-----------|-----|
| 2011 (3) |     |      |           | 2012 (1) |     |      |           | 2013 (2) |     |      |           | 2014 (3) |     |      |           |     |
| HP       | Ind | Dom  | $\bar{x}$ | SE       | Ind | Dom  | $\bar{x}$ | SE       | Ind | Dom  | $\bar{x}$ | SE       | Ind | Dom  | $\bar{x}$ | SE  |
| FIE      | 15  | 1,3  | 3,0       | 0,6      | 375 | 40,1 | 75,0      | 6,3      | 64  | 11,5 | 12,8      | 4,1      | 22  | 8,7  | 4,4       | 1,1 |
| GRL      | 232 | 19,9 | 46,4      | 4,2      | 142 | 15,2 | 28,4      | 2,9      | 26  | 4,7  | 5,2       | 0,9      | 36  | 14,3 | 7,2       | 2,9 |
| RUD      | 33  | 2,8  | 6,6       | 0,2      | 20  | 2,1  | 4,0       | 0,7      | 36  | 6,5  | 7,2       | 1,2      | 30  | 11,9 | 6,0       | 1,5 |
| FOR      | 818 | 70,2 | 163,6     | 10,8     | 323 | 34,6 | 64,6      | 9,3      | 373 | 66,8 | 74,6      | 3,6      | 149 | 59,1 | 29,8      | 4,6 |
| MIX      | 67  | 5,8  | 13,4      | 2,1      | 74  | 7,9  | 14,8      | 2,4      | 59  | 10,6 | 11,8      | 2,8      | 15  | 6,0  | 3,0       | 2,8 |
