# Supplementary material
Source: MDPI journal article supplement (https://www.mdpi.com/2073-445X/13/2/145)
Supplement: s1 [file s1]

|       | 2011 |      |       |      | 2012 |      |       |      | 2013 |       |       |       | 2014 |       |       |      |
|-------|------|------|-------|------|------|------|-------|------|------|-------|-------|-------|------|-------|-------|------|
|       | eury |      | steno |      | eury |      | steno |      | eury |       | steno |       | eury |       | steno |      |
|       | Ind  | Dom  | Ind   | Dom  | Ind  | Dom  | Ind   | Dom  | Ind  | Dom   | Ind   | Dom   | Ind  | Dom   | Ind   | Dom  |
| Plots |      |      |       |      |      |      |       |      |      |       |       |       |      |       |       |      |
| SRC1  | 306  | 78,3 | 85    | 21,7 | 230  | 54,6 | 191   | 45,4 | 125  | 44,01 | 159   | 56,0  | 93   | 13,2  | 610   | 86,8 |
| SRC2  | 497  | 79,8 | 126   | 20,2 | 142  | 59,2 | 98    | 40,8 | 63   | 34,05 | 122   | 66,0  | 193  | 47,8  | 211   | 52,2 |
| SRC3  | 173  | 44,7 | 214   | 55,3 | 195  | 70,1 | 83    | 29,9 | 182  | 53,22 | 160   | 46,8  | 111  | 22,4  | 384   | 77,6 |
| SRC4  | 410  | 50,1 | 408   | 49,9 | 286  | 88,5 | 37    | 11,5 | 322  | 86,33 | 51    | 13,67 | 61   | 40,94 | 88    | 59,1 |
