# Supplementary material
Source: MDPI journal article supplement (https://www.mdpi.com/2073-445X/13/2/145)
Supplement: s1 [file s1]

| Symbols DiffET     | Symbol sum | Meaning                                                                                             |
|--------------------|------------|-----------------------------------------------------------------------------------------------------|
| h, (h)             | h          | hygrophilic/ slightly hygrophilic species of open land                                              |
| x, (x)             | x          | xerophilic slightly xerophilic species of open land                                                 |
| eu                 | eu         | eurytopic species of open land                                                                      |
| hf, h(f)           | hf         | hygrophilic species, in open land and/or in wet forests                                             |
| (h)f, (h)(f)       | (h)f       | slightly hygrophilic species, in open land and/or in moist forests                                  |
| (x)f, x(f), (x)(f) | (x)f       | xerophilic/ slightly xerophilic species in open land and/or in dry and/or in moderately dry forests |
| f, (f)             | f          | eurytopic/ predominantly eurytopic forest species                                                   |
