# Supplementary material
Source: MDPI journal article supplement (https://www.mdpi.com/2073-445X/13/2/145)
Supplement: s1 [file s1]

| Plots  | CaseE.1 | CaseE.2 | Case E.3 | CaseE.4 | CaseR.1 | CaseR.2 | CaseR.3 | CaseR.4 |
|--------|---------|---------|----------|---------|---------|---------|---------|---------|
| FIE11  | -0.999  | -1.186  | 1.768    | -1.206  | -0.940  | -1.119  | 1.759   | 0.416   |
| FAL11  | -0.954  | 1.044   | -0.424   | 0.723   | -0.748  | 0.617   | 0.161   | 2.856   |
| GRO11  | 1.475   | -0.119  | -0.782   | 0.234   | 1.978   | 0.128   | 0.385   | 1.070   |
| SRC111 | -0.308  | -0.634  | 1.299    | 0.126   | -0.651  | -0.610  | 0.931   | 2.475   |
| SRC211 | -0.349  | -1.060  | -0.321   | 0.061   | -0.684  | -0.638  | 0.609   | 2.026   |
| SRC311 | -0.420  | -0.726  | -0.136   | 1.845   | -0.432  | -0.738  | 0.761   | 2.630   |
| SRC411 | 1.496   | 0.083   | 1.607    | 0.575   | 0.079   | -0.764  | 0.542   | 2.715   |
| HEA11  | -0.872  | -1.355  | 0.106    | 3.057   | -0.561  | -0.795  | 0.927   | 2.853   |
| FOR11  | 1.948   | 0.114   | 0.191    | -0.260  | 2.267   | 0.524   | 1.500   | -0.791  |
| MEA11  | -0.968  | 2.474   | -0.090   | -0.581  | -0.688  | 2.713   | 0.916   | -0.853  |
| FIE12  | -1.114  | -1.308  | 2.085    | -0.841  | -0.598  | -1.221  | 2.531   | -3.204  |
| FAL12  | -0.569  | 0.717   | 0.044    | 0.738   | -0.597  | 0.836   | -1.191  | 2.154   |
| GRO12  | 1.568   | -0.194  | 0.253    | 0.493   | 1.903   | 0.137   | 0.433   | 0.535   |
| SRC112 | -0.332  | -0.659  | -1.368   | -1.015  | -0.663  | -0.456  | -0.866  | -0.906  |
| SRC212 | -0.142  | -1.014  | -0.457   | -0.102  | -0.310  | -0.903  | -1.430  | -0.028  |
| SRC312 | -0.805  | -0.466  | -0.818   | -0.610  | -0.772  | -0.290  | -0.744  | 0.167   |
| SRC412 | -0.657  | -0.235  | -0.036   | -0.723  | -0.651  | -0.195  | 0.574   | 0.693   |
| HEA12  | -0.882  | -0.496  | -0.580   | 2.304   | -0.892  | -0.438  | -0.454  | 0.920   |
| FOR12  | 1.937   | 0.367   | 1.103    | -0.276  | 2.060   | 0.293   | 0.983   | -1.409  |
| MEA12  | -0.654  | 2.009   | 0.206    | -0.128  | -0.599  | 2.358   | 0.922   | -1.223  |
| FIE13  | -1.062  | -1.105  | 1.230    | -2.173  | -0.839  | -0.997  | 1.987   | -2.197  |
| FAL13  | -0.645  | 1.174   | 0.024    | 0.542   | -0.332  | 0.652   | -1.577  | 1.528   |
| GRO13  | 1.724   | -0.107  | 0.256    | 0.640   | 1.912   | -0.265  | 0.309   | 0.994   |
| SRC113 | 0.171   | -0.450  | -0.678   | -0.460  | -0.340  | -0.734  | -1.555  | -2.115  |
| SRC213 | 0.070   | -0.952  | -0.442   | 0.735   | 0.056   | -1.018  | -1.977  | 0.022   |
| SRC313 | -0.120  | 0.151   | -1.351   | -0.961  | -0.425  | -0.204  | -2.203  | -0.629  |
| SRC413 | -0.135  | 0.565   | -1.315   | -1.427  | -0.325  | 0.222   | -1.057  | -0.730  |
| HEA13  | -0.947  | 0.027   | -0.599   | 1.786   | -0.999  | -0.505  | 0.132   | 0.635   |
| FOR13  | 2.038   | 0.226   | 0.779    | 0.303   | 2.299   | 0.340   | 0.748   | -0.962  |
| MEA13  | -0.585  | 2.109   | 0.404    | -0.286  | -0.404  | 2.530   | 0.748   | -0.130  |
| FIE14  | -0.946  | -1.028  | 2.412    | -0.338  | -0.777  | -1.326  | 2.040   | -1.929  |
| FAL14  | -0.270  | 1.097   | 0.723    | 0.575   | -0.881  | 1.577   | -0.142  | -0.281  |
| GRO14  | 1.251   | -0.392  | -1.017   | -0.089  | 1.984   | 0.010   | 0.380   | 1.648   |
| SRC114 | 0.180   | -0.716  | -1.208   | -0.497  | 0.062   | -0.980  | -2.032  | -2.382  |
| SRC214 | -0.642  | -0.934  | -1.179   | -1.082  | -0.560  | -0.998  | -0.839  | -0.629  |
| SRC314 | -0.182  | -0.600  | -2.099   | -0.542  | 0.165   | -0.587  | -3.047  | -2.649  |
| SRC414 | 0.836   | -0.109  | -0.878   | -0.672  | -0.107  | -0.433  | -1.920  | -1.031  |
| HEA14  | -0.416  | 1.377   | 0.412    | 0.364   | -0.884  | 0.260   | -0.819  | -0.874  |
| FOR14  | 1.849   | 0.221   | 0.502    | -0.562  | 2.209   | 0.239   | 0.672   | -0.822  |
| MEA14  | -0.571  | 2.090   | 0.374    | -0.269  | -0.316  | 2.779   | 0.904   | -0.566  |
