# Supplementary material
Source: MDPI journal article supplement (https://www.mdpi.com/2073-445X/13/2/145)
Supplement: s1 [file s1]

| SRC1     |      |      |           |      |          |      |           |      |          |      |           |      |          |      |           |      |
|----------|------|------|-----------|------|----------|------|-----------|------|----------|------|-----------|------|----------|------|-----------|------|
| 2011 (1) |      |      |           |      | 2012 (2) |      |           |      | 2013 (3) |      |           |      | 2014 (4) |      |           |      |
| HP       | Ind  | Dom  | $\bar{x}$ | SE   | Ind      | Dom  | $\bar{x}$ | SE   | Ind      | Dom  | $\bar{x}$ | SE   | Ind      | Dom  | $\bar{x}$ | SE   |
| FIE      | 1987 | 57,0 | 397,4     | 21,0 | 386      | 39,7 | 77,2      | 14,0 | 470      | 47,3 | 94,0      | 15,1 | 333      | 32,2 | 66,6      | 8,9  |
| GRL      | 821  | 23,6 | 164,2     | 5,8  | 242      | 24,9 | 48,4      | 8,1  | 115      | 11,6 | 23,0      | 5,3  | 95       | 9,2  | 19,0      | 4,1  |
| DRY      | 204  | 5,9  | 40,8      | 3,5  | 133      | 13,7 | 26,6      | 5,7  | 77       | 7,7  | 15,4      | 6,2  | 28       | 2,7  | 5,6       | 1,6  |
| FOR      | 417  | 12,0 | 83,4      | 16,2 | 146      | 15,0 | 29,2      | 3,0  | 276      | 27,8 | 55,2      | 3,2  | 391      | 37,9 | 78,2      | 14,0 |
| MIX      | 55   | 1,6  | 11,0      | 0,9  | 66       | 6,8  | 13,2      | 1,8  | 56       | 5,6  | 11,2      | 1,6  | 186      | 18,0 | 37,2      | 3,2  |

  

| SRC2     |      |      |           |      |          |      |           |     |          |      |           |      |          |      |           |      |
|----------|------|------|-----------|------|----------|------|-----------|-----|----------|------|-----------|------|----------|------|-----------|------|
| 2011 (2) |      |      |           |      | 2012 (3) |      |           |     | 2013 (4) |      |           |      | 2014 (1) |      |           |      |
| HP       | Ind  | Dom  | $\bar{x}$ | SE   | Ind      | Dom  | $\bar{x}$ | SE  | Ind      | Dom  | $\bar{x}$ | SE   | Ind      | Dom  | $\bar{x}$ | SE   |
| FIE      | 2387 | 56,3 | 477,4     | 24,2 | 165      | 31,9 | 33,0      | 2,3 | 258      | 24,9 | 51,6      | 5,8  | 618      | 50,6 | 123,6     | 14,0 |
| GRL      | 536  | 12,6 | 107,2     | 15,0 | 71       | 13,7 | 14,2      | 1,6 | 54       | 5,2  | 10,8      | 2,0  | 169      | 13,8 | 33,8      | 6,5  |
| DRY      | 931  | 21,9 | 186,2     | 35,1 | 56       | 10,8 | 11,2      | 1,0 | 20       | 1,9  | 4,0       | 0,5  | 45       | 3,7  | 9,0       | 2,1  |
| FOR      | 296  | 7,0  | 59,2      | 8,2  | 165      | 31,9 | 33,0      | 2,3 | 616      | 59,4 | 123,2     | 14,0 | 201      | 16,5 | 40,2      | 5,8  |
| MIX      | 93   | 2,2  | 18,6      | 3,4  | 61       | 11,8 | 12,2      | 2,0 | 89       | 8,6  | 17,8      | 5,4  | 188      | 15,4 | 37,6      | 4,0  |

  

| SRC3     |     |      |           |      |          |      |           |     |          |      |           |      |          |      |           |      |
|----------|-----|------|-----------|------|----------|------|-----------|-----|----------|------|-----------|------|----------|------|-----------|------|
| 2011 (3) |     |      |           |      | 2012 (1) |      |           |     | 2013 (2) |      |           |      | 2014 (3) |      |           |      |
| HP       | Ind | Dom  | $\bar{x}$ | SE   | Ind      | Dom  | $\bar{x}$ | SE  | Ind      | Dom  | $\bar{x}$ | SE   | Ind      | Dom  | $\bar{x}$ | SE   |
| FIE      | 874 | 43,3 | 174,8     | 24,3 | 266      | 34,1 | 53,2      | 6,4 | 84       | 20,7 | 16,8      | 3,9  | 110      | 12,3 | 22,0      | 4,8  |
| GRL      | 431 | 21,3 | 86,2      | 11,0 | 212      | 27,1 | 42,4      | 2,8 | 55       | 13,5 | 11,0      | 3,8  | 10       | 1,1  | 2,0       | 0,5  |
| DRY      | 91  | 4,5  | 18,2      | 3,0  | 69       | 8,8  | 13,8      | 2,5 | 14       | 3,4  | 2,8       | 1,0  | 5        | 0,6  | 1,0       | 0,4  |
| FOR      | 555 | 27,5 | 111,0     | 17,6 | 144      | 18,4 | 28,8      | 1,9 | 179      | 44,1 | 35,8      | 10,3 | 656      | 73,5 | 131,2     | 24,3 |
| MIX      | 69  | 3,4  | 13,8      | 0,9  | 90       | 11,5 | 18,0      | 1,9 | 74       | 18,2 | 14,8      | 2,0  | 112      | 12,5 | 22,4      | 3,5  |

  

| SRC4     |     |      |           |      |          |      |           |     |          |      |           |     |          |      |           |     |
|----------|-----|------|-----------|------|----------|------|-----------|-----|----------|------|-----------|-----|----------|------|-----------|-----|
| 2011 (3) |     |      |           |      | 2012 (1) |      |           |     | 2013 (2) |      |           |     | 2014 (3) |      |           |     |
| HP       | Ind | Dom  | $\bar{x}$ | SE   | Ind      | Dom  | $\bar{x}$ | SE  | Ind      | Dom  | $\bar{x}$ | SE  | Ind      | Dom  | $\bar{x}$ | SE  |
| FIE      | 701 | 36,0 | 140,2     | 10,3 | 240      | 35,8 | 48,0      | 4,1 | 77       | 24,1 | 15,4      | 2,2 | 124      | 33,8 | 24,8      | 3,9 |
| GRL      | 280 | 14,4 | 56,0      | 10,2 | 260      | 38,7 | 52,0      | 4,2 | 97       | 30,4 | 19,4      | 3,5 | 31       | 8,4  | 6,2       | 1,5 |
| DRY      | 38  | 2,0  | 7,6       | 1,1  | 34       | 5,1  | 6,8       | 1,1 | 7        | 2,2  | 1,4       | 0,6 | 5        | 1,4  | 1,0       | 0,4 |
| FOR      | 904 | 46,5 | 180,8     | 16,6 | 78       | 11,6 | 15,6      | 3,1 | 125      | 39,2 | 25,0      | 3,4 | 175      | 47,7 | 35,0      | 7,1 |
| MIX      | 22  | 1,1  | 4,4       | 0,7  | 59       | 8,8  | 11,8      | 3,7 | 13       | 4,1  | 2,6       | 0,7 | 32       | 8,7  | 6,4       | 0,6 |
