# Supplementary material
Source: MDPI journal article supplement (https://www.mdpi.com/2073-445X/13/2/145)
Supplement: s1 [file s1]

| Symbol                          | Meaning                                                                    |
|---------------------------------|----------------------------------------------------------------------------|
| in open habitats                |                                                                            |
| h                               | hygrophilic species of open land                                           |
| (h)                             | slightly hygrophilic species of open land                                  |
| x                               | xerophilic species of open land                                            |
| (x)                             | slightly xerophilic species of open land                                   |
| eu                              | eurytopic species of open land                                             |
| in shaded habitats              |                                                                            |
| hf                              | hygrophilic forest species                                                 |
| (h)f                            | slightly hygrophilic forest species                                        |
| (x)f                            | slightly xerophilic forest species                                         |
| f                               | eurytopic forest species                                                   |
| (f)                             | predominantly eurytopic forest species                                     |
| in open and/ or shaded habitats |                                                                            |
| h(f)                            | hygrophilic species in open land and/or wet forests                        |
| (h)(f)                          | slightly hygrophilic species in open land and/or moist forests             |
| x(f)                            | xerophilic species in open land and/ or in dry forests                     |
| (x)(f)                          | slightly xerophilic species in open land and/ or in moderately dry forests |
