# Supplementary material
Source: MDPI journal article supplement (https://www.mdpi.com/2073-445X/13/2/145)
Supplement: s1 [file s1]

| Plots  | CaseE.1 | CaseE.2 | CaseE.3 | CaseE.4 | CaseR.1 | CaseR.2 | CaseR.3 | CaseR.4 |
|--------|---------|---------|---------|---------|---------|---------|---------|---------|
| FIE11  | -1.426  | -1.349  | -1.493  | -0.792  | -1.315  | -1.311  | -2.634  | 0.264   |
| FAL11  | -0.806  | 1.022   | 0.526   | 0.458   | 0.037   | 1.016   | 1.522   | 2.759   |
| GRO11  | 1.634   | 0.009   | 0.541   | 0.242   | 1.744   | -0.109  | -0.699  | 0.128   |
| SRC111 | -0.591  | -0.958  | -1.124  | -0.156  | -0.676  | -0.947  | 0.057   | 2.051   |
| SRC211 | -0.264  | -0.954  | 0.585   | -0.036  | -0.764  | -0.136  | 0.436   | 3.857   |
| SRC311 | -0.130  | -0.485  | 1.129   | 3.369   | 0.097   | -0.478  | 1.211   | 4.439   |
| SRC411 | 1.195   | -0.247  | -1.634  | 1.211   | 0.724   | -0.311  | 1.365   | 3.015   |
| HEA11  | -0.700  | -1.730  | 0.800   | 1.896   | -0.895  | -1.523  | -0.582  | 1.445   |
| FOR11  | 1.843   | 0.037   | -0.668  | -0.217  | 1.600   | 0.119   | -2.281  | -1.599  |
| MEA11  | -0.933  | 2.623   | -0.131  | 0.290   | -1.018  | 2.651   | -1.912  | 1.139   |
| FIE12  | -1.549  | -1.472  | -1.571  | 0.029   | -1.402  | -1.520  | -2.217  | -1.048  |
| FAL12  | -0.553  | 0.524   | -0.025  | 0.126   | -0.163  | 0.898   | 1.267   | 1.512   |
| GRO12  | 1.516   | -0.327  | -0.430  | 0.462   | 1.802   | -0.143  | -1.362  | -0.595  |
| SRC112 | -0.152  | -0.396  | 1.126   | -1.829  | -0.714  | -0.580  | 0.823   | 0.741   |
| SRC212 | -0.014  | -0.781  | 0.735   | 0.280   | -0.500  | -0.870  | 1.141   | 1.685   |
| SRC312 | -0.639  | -0.157  | 0.962   | -0.416  | -0.643  | -0.133  | 1.028   | -0.717  |
| SRC412 | -0.667  | -0.080  | 0.127   | -0.369  | -0.836  | -0.200  | -0.220  | -2.415  |
| HEA12  | -0.637  | -0.737  | 1.091   | 0.946   | -1.143  | -0.661  | -0.225  | -0.457  |
| FOR12  | 1.614   | 0.029   | -1.664  | -0.456  | 1.634   | -0.037  | -1.962  | -1.373  |
| MEA12  | -0.681  | 1.983   | -0.391  | 0.289   | -1.035  | 2.514   | -2.018  | 0.664   |
| FIE13  | -1.478  | -1.171  | -1.298  | -2.233  | -1.266  | -1.212  | -1.460  | -2.459  |
| FAL13  | -0.617  | 1.053   | -0.042  | 0.299   | -0.030  | 0.884   | 1.353   | 2.148   |
| GRO13  | 1.668   | -0.290  | -0.483  | 0.451   | 1.848   | -0.120  | -0.843  | 1.741   |
| SRC113 | 0.258   | -0.326  | 0.522   | -0.859  | 0.086   | -0.656  | 1.916   | -0.341  |
| SRC213 | 0.266   | -0.759  | 0.893   | 1.269   | -0.008  | -1.051  | 1.410   | 0.860   |
| SRC313 | 0.101   | 0.515   | 1.091   | -1.000  | 0.122   | -0.012  | 2.399   | -1.203  |
| SRC413 | 0.049   | 0.966   | 0.905   | -1.307  | -0.320  | -0.237  | 1.814   | -2.535  |
| HEA13  | -0.717  | -0.125  | 0.981   | 0.793   | -0.760  | -0.910  | 0.855   | -1.906  |
| FOR13  | 1.838   | -0.056  | -1.183  | 0.219   | 1.817   | -0.213  | -1.162  | 1.189   |
| MEA13  | -0.662  | 2.069   | -0.627  | 0.268   | -0.965  | 2.706   | -1.646  | 0.800   |
| FIE14  | -1.400  | -1.264  | -1.803  | 0.814   | -1.163  | -1.568  | -1.744  | -1.705  |
| FAL14  | -0.398  | 0.818   | -0.772  | 0.393   | -0.332  | 0.793   | 0.474   | -0.744  |
| GRO14  | 1.417   | -0.250  | 0.705   | -0.493  | 1.916   | -0.089  | -0.430  | -0.630  |
| SRC114 | 0.400   | -0.405  | 1.144   | -0.623  | 1.051   | -0.098  | 1.853   | -1.055  |
| SRC214 | -0.497  | -0.683  | 1.048   | -1.862  | -0.487  | 0.196   | 0.508   | -1.599  |
| SRC314 | 0.246   | -0.052  | 2.092   | -0.540  | 0.915   | -0.012  | 2.332   | -1.862  |
| SRC414 | 0.960   | 0.123   | 0.559   | -0.647  | 0.393   | 0.782   | 1.095   | -2.954  |
| HEA14  | -0.486  | 1.190   | -0.522  | 0.258   | -0.313  | 0.027   | 1.969   | -2.737  |
| FOR14  | 1.638   | 0.047   | -1.096  | -0.754  | 1.926   | -0.152  | -1.551  | -0.644  |
| MEA14  | -0.645  | 2.045   | -0.607  | 0.224   | -0.656  | 2.700   | -1.880  | 0.141   |
